# Supplementary material for: Descriptive study of possible link between cardioankle vascular index and homocysteine in vascular-related diseases
Source: PubMed Central journal article supplement — BMJ Open. 2013 Mar 25;3(3):e002483. doi: 10.1136/bmjopen-2012-002483 (PMC3612818; doi:10.1136/bmjopen-2012-002483), 2013-03-25
Supplement: bmjopen-2012-002483.draft_revisions.pdf [file bmjopen-2012-002483.draft_revisions.pdf]

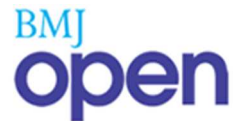

**Descriptive study of possible link between cardio-ankle vascular index and homocysteine in vascular-related diseases**

|                                 |                                                                                                                                                                                                                                                                                                                                                                                                                                                                                                                                                                        |
|---------------------------------|------------------------------------------------------------------------------------------------------------------------------------------------------------------------------------------------------------------------------------------------------------------------------------------------------------------------------------------------------------------------------------------------------------------------------------------------------------------------------------------------------------------------------------------------------------------------|
| Journal:                        | <i>BMJ Open</i>                                                                                                                                                                                                                                                                                                                                                                                                                                                                                                                                                        |
| Manuscript ID:                  | bmjopen-2012-002483                                                                                                                                                                                                                                                                                                                                                                                                                                                                                                                                                    |
| Article Type:                   | Research                                                                                                                                                                                                                                                                                                                                                                                                                                                                                                                                                               |
| Date Submitted by the Author:   | 11-Dec-2012                                                                                                                                                                                                                                                                                                                                                                                                                                                                                                                                                            |
| Complete List of Authors:       | Liu, Jinbo; Department of Endocrinology<br>Wang, Hongyu; Peking University Shougang Hospital, Department of Vascular Medicine<br>Wang, Qi; Peking University Shougang Hospital, Department of Vascular Medicine<br>Zhao, Hongwei; Peking University Shougang Hospital, Department of Vascular Medicine<br>Shi, Hongyan; Peking University Shougang Hospital, Department of Vascular Medicine<br>Yu, Xiaolan; Peking University Shougang Hospital, Department of Vascular Medicine<br>Fu, Xiaobao; Peking University Shougang Hospital, Department of Vascular Medicine |
| <b>Primary Subject Heading</b>: | Cardiovascular medicine                                                                                                                                                                                                                                                                                                                                                                                                                                                                                                                                                |
| Secondary Subject Heading:      | Cardiovascular medicine                                                                                                                                                                                                                                                                                                                                                                                                                                                                                                                                                |
| Keywords:                       | Coronary heart disease < CARDIOLOGY, VASCULAR MEDICINE, Hypertension < CARDIOLOGY                                                                                                                                                                                                                                                                                                                                                                                                                                                                                      |
|                                 |                                                                                                                                                                                                                                                                                                                                                                                                                                                                                                                                                                        |

SCHOLARONE™  
Manuscripts

1  
2  
3  
4 Descriptive study of possible link between cardio-ankle vascular index  
5  
6 and homocysteine in vascular-related diseases  
7  
8

9 Hongyu Wang<sup>\*,1,#</sup>, Jinbo Liu<sup>\*,1</sup>, Qi Wang<sup>1</sup>, Hongwei Zhao<sup>1</sup>, Hongyan Shi<sup>1</sup>,  
10  
11 Xiaolan Yu<sup>1</sup>, Xiaobao Fu<sup>1</sup>  
12  
13

14  
15 <sup>1</sup> Department of Vascular Medicine; Peking University Shougang Hospital, Beijing  
16  
17 100144, P. R. of China.  
18  
19

20  
21 \* Equal contributors  
22  
23

24  
25 #Corresponding Author: Hongyu Wang, Vascular Medicine; Peking University  
26  
27 Shougang Hospital; Beijing 100144, P. R. of China.  
28  
29

30  
31 Tel (Fax): +8610-57830226; +8610-57830226  
32

33  
34 Email: [hongyuwang@188.com](mailto:hongyuwang@188.com)  
35  
36

37  
38 *Running title:* CAVI and Homocysteine  
39  
40  
41  
42  
43  
44  
45  
46  
47  
48  
49  
50  
51  
52  
53  
54  
55  
56  
57  
58  
59  
60

## Abstract

**Objectives:** Cardio-ankle vascular index (CAVI) is a new index of arterial stiffness independent of immediate blood pressure. Homocysteine (Hcy) is an independent risk factor for vascular diseases. The aim of this study was to investigate the relationship between Hcy and CAVI in vascular-related diseases.

**Design:** Descriptive Research.

**Participants:** 88 patients (M/F 46/42) with or without hypertension, coronary artery disease or arteriosclerosis obliterans were enrolled into our study. They were divided into two groups according to the level of Hcy.

**Methods:** CAVI, carotid-femoral pulse wave velocity (CFPWV) and carotid-radial pulse wave velocity (CRPWV) were measured by VS-1000 and Complior apparatus.

**Results:** There was significant correlation between Hcy and CF-PWV, CR-PWV, and CAVI in the entire group ( $r=0.33$ ,  $p=0.002$ ;  $r=0.51$ ,  $p<0.001$ ;  $r=0.42$ ,  $p<0.001$ ; respectively). The level of Hcy was significantly higher in patients with one or more vascular diseases than in patients without vascular diseases. The levels of CF-PWV, CR-PWV, and CAVI were significantly higher in Hcy  $\geq 15\mu\text{mol/L}$  group than in Hcy  $<15\mu\text{mol/L}$  group ( $13.7\pm 3.0$  vs  $10.8\pm 2.5$ ,  $p<0.001$ ;  $10.6\pm 2.1$  vs  $9.2\pm 1.6$ ,  $p=0.001$ ;  $9.30\pm 2.1$  vs  $7.79\pm 2.1$ ,  $p=0.001$ ; respectively). Multiple linear regression showed that Hcy, body mass index (BMI), and age were independent associating factors of CAVI ( $\beta=0.421$ ,  $p=0.001$ ;  $\beta=-0.309$ ,  $p=0.006$ ;  $\beta=0.297$ ,  $p=0.012$ ; respectively).

**Conclusions:** CAVI was positively correlated with homocysteine in vascular-related diseases.

1  
2  
3  
4  
5  
6  
7  
8  
9  
10  
11  
12  
13  
14  
15  
16  
17  
18  
19  
20  
21  
22  
23  
24  
25  
26  
27  
28  
29  
30  
31  
32  
33  
34  
35  
36  
37  
38  
39  
40  
41  
42  
43  
44  
45  
46  
47  
48  
49  
50  
51  
52  
53  
54  
55  
56  
57  
58  
59  
60

*Keywords:* Cardio-ankle vascular index; Homocysteine; Vascular-related diseases

For peer review only

1  
2  
3 Article summary  
4

5 1. Article focus  
6

7 To investigate the relationship between homocysteine (Hcy) and Cardio-ankle  
8 vascular index (CAVI) in vascular-related diseases.  
9

10  
11 2. Key messages

12 Homocysteine was positively correlated with CAVI in vascular-related diseases.

13 3. Strengths and limitations of this study

14  
15 Strengths of this study: our present study firstly showed the relationship between  
16 Hcy and CAVI in vascular-related diseases.  
17  
18

19  
20 Limitations of this study: the small simple size, cases, and controls were not  
21 perfectly matched.  
22  
23  
24  
25  
26  
27  
28  
29  
30  
31  
32  
33  
34  
35  
36  
37  
38  
39  
40  
41  
42  
43  
44  
45  
46  
47  
48  
49  
50  
51  
52  
53  
54  
55  
56  
57  
58  
59  
60

## 1. Introduction

Arterial stiffness is a strong predictor of future cardiovascular events and all-cause mortality. And it is one of the earliest detectable manifestations of adverse structural and functional changes within the vessel wall [1]. Arterial stiffness can be measured by pulse wave velocity (PWV), which is considered as the gold standard method suggested by European Society of Hypertension/European Society of Cardiology guidelines [2]. And our previous studies also showed that PWV was positively correlated with pulse pressure and it was increased in hypertension patients with left ventricular hypertrophy [3, 4]. However, PWV itself is essentially dependent on blood pressure especially immediate blood pressure. Cardio-ankle vascular index (CAVI), a new index of arterial stiffness independent of blood pressure, is recently developed by measuring of PWV and blood pressure [5]. Recent studies have showed that CAVI was a reliable index of arterial stiffness in many vascular-related diseases [6,7].

Homocysteine has been considered as an independent risk factor for atherosclerosis [8]. The possible mechanism of this process includes endothelial cell damage, vascular endothelial dysfunction and enhanced oxidative stress. Recent studies showed that homocysteine caused endothelial dysfunction through inhibiting the reactions between endothelial nitric oxide synthase (eNOS) and tetrahydrobiopterin (BH4) [9,10]. Our previous study showed that chronic hyperhomocysteinemia contributed to coronary artery disease by inhibiting dysfunction of the coronary artery endothelium [11]. Increased arterial stiffness

1  
2  
3  
4 resulted from many factors such endothelial dysfunction, smooth muscle cells  
5  
6 proliferation, thickening of vascular wall. Kadota et al had showed positive  
7  
8 correlation between Hcy and CAVI in general population [12]. However, the  
9  
10 relationship between CAVI and Hcy in vascular-related diseases such as hypertension,  
11  
12 coronary artery disease (CAD), and arteriosclerosis obliterans (ASO) was still  
13  
14 unknown, especially in patients with one more kinds of vascular-related diseases. In  
15  
16 the present study, we investigated the possible link between CAVI and homocysteine  
17  
18 in vascular-related diseases such as hypertension, CAD and ASO.  
19  
20  
21  
22  
23  
24  
25

## 26 **2. Materials and methods**

### 27 *2.1 Subjects*

28  
29  
30  
31 88 patients (M/F: 46/42) with or without hypertension, CAD or ASO from  
32  
33 vascular medicine department of Peking University Shougang Hospital from February  
34  
35 2012 to April 2012 were enrolled into our study. There were 57 patients with  
36  
37 hypertension, 43 with CAD, and 25 patients with ASO in the whole study groups.  
38  
39

40  
41 Hypertension was defined as known cases of hypertension or blood pressure  
42  
43 measurement  $\geq 140/90$ mmHg in three occasions at rest. CAD or ASO was defined as  
44  
45 the narrowing or blockage of coronary artery or lower extremity artery diagnosed by  
46  
47 angiography. Hyperhomocysteinemia was defined as the level of plasma Hcy  $\geq$   
48  
49 15umol/L[11].  
50  
51  
52

53  
54 Enrolled patients were divided into four groups according to numbers of  
55  
56 suffering vascular-related diseases. Also they were divided into two groups according  
57  
58  
59  
60

1  
2  
3  
4 to level of Hcy (Hcy <15umol/L group, N=43, and Hcy  $\geq$ 15umol/L group, N=45).

5  
6 All participants gave their written informed consent. This study was approved by the  
7  
8 ethics committee of the Health Science Center, Peking University.  
9

## 10 11 12 13 14 *2.2 Pulse wave velocity measurement*

15  
16 Arterial stiffness was evaluated by measuring automatic PWV using the  
17  
18 Complior apparatus. The basic principle of PWV assessment is that pressure pulse  
19  
20 generated by ventricular ejection is propagated along the arterial system at a speed  
21  
22 determined by elasticity of the arterial wall. Knowing the distance and pulse transit  
23  
24 time, the velocity can be calculated. Patients were placed in recumbent position and,  
25  
26 after a 10-minute rest, underwent PWV measurement and carotid-femoral PWV  
27  
28 (CFPWV) and carotid-radial PWV (CRPWV) was obtained automatically.  
29  
30  
31  
32  
33  
34  
35  
36  
37  
38

## 39 40 41 42 43 44 45 46 47 48 *2.3 The assessment of CAVI*

49  
50 CAVI was recorded using a VaseraVS-1000 vascular screening system  
51  
52 (Fukuda Denshi, Tokyo, Japan) with the participant resting in a supine position. ECG  
53  
54 electrodes were placed on both wrists, a microphone for detecting heart sounds was  
55  
56 placed on the sternum, and cuffs were wrapped around both the arms and ankles.  
57  
58 After automatic measurements, obtained data were analyzed by software, and the  
59  
60 value of CAVI was obtained automatically [16].

## 61 62 63 64 65 66 67 68 69 70 *2.4 Laboratory measurements*



1  
2  
3  
4 Blood samples were drawn from an antecubital vein in the morning after  
5  
6 overnight fasting and collected into vacuum tubes containing EDTA for the  
7  
8 measurement of plasma lipid and lipoprotein levels. Total cholesterol, high-density  
9  
10 lipoprotein (HDL) cholesterol, and triglyceride levels were analyzed by colorimetric  
11  
12 enzymatic assays with the use of an autoanalyzer (HITACHI-7170, Hitachi, Tokyo,  
13  
14 Japan). Low-density lipoprotein cholesterol (LDL-C) levels were calculated. Fasting  
15  
16 plasma glucose, homocysteine, hs-C reactive protein were determined at the central  
17  
18 chemistry laboratory of the Peking University Shougang Hospital.  
19  
20  
21  
22  
23  
24  
25  
26

### 27 *2.5 Statistical analysis*

28  
29 The difference between groups were analyzed by Student' *t*-test and one-way  
30  
31 ANOVA. Correlation coefficient was done to find linear relation between different  
32  
33 variables using Spearman correlation coefficient. Multiple linear regressions were  
34  
35 used to estimate the coefficients of the linear equation, involving independent  
36  
37 variables that affected the value of the dependent variables. Values were shown as  
38  
39 mean  $\pm$  SD unless stand otherwise.  $p < 0.05$  (2-tailed) was considered statistically  
40  
41 significant.  
42  
43  
44  
45  
46  
47  
48

## 49 **3. Results**

### 50 *3.1 Clinical characteristics of the study participants*

51  
52 The clinical characteristics of study participants are shown in Table 1. Among  
53  
54 these subjects, 33 patients had only one of these three vascular-related diseases, 34  
55  
56  
57  
58  
59  
60

1  
2  
3 patients had two of these three vascular-related diseases, 9 patients had all of these  
4  
5 three diseases, and 12 subjects with none of vascular-related diseases. Our results  
6  
7 showed that with the increasing numbers of suffered vascular-related diseases, the  
8  
9 level of Hcy was increasing. Similar results were also found in the parameters of  
10  
11 CF-PWV and CAVI. However, we found there was significant difference about age  
12  
13 between these four groups.  
14  
15  
16  
17  
18

19 Next, we divided subjects into two groups according to the level of Hcy. As  
20  
21 shown in Table 2, the level of CAVI was significant higher in patients with  $Hcy \geq$   
22  
23 15umol/L than in group with  $Hcy < 15umol/L$ . The similar result was also found in  
24  
25 another evaluation index of arterial stiffness-PWV. However, there was significant  
26  
27 difference about age between these two groups.  
28  
29  
30  
31  
32

### 33 3.2 Pearson correlations between PWV, CAVI and Hcy in the entire study group

34  
35  
36 PWV is a golden evaluation of arterial stiffness of vascular diseases. There are  
37  
38 some kinds of PWV according to different arteries, such as carotid-femoral pulse  
39  
40 wave velocity (CF-PWV), and carotid-radial pulse wave velocity (CR-PWV). As  
41  
42 shown in Fig 1. CF-PWV was positively correlated with Hcy in entire group ( $r=0.33$ ,  
43  
44  $p=0.002$ , Fig 1A). There was also significant positive correlation between CR-PWV  
45  
46 and Hcy in all patients ( $r=0.51$ ,  $p<0.001$ , Fig 1B).  
47  
48  
49  
50

51 CAVI, a new index of arterial stiffness independent of blood pressure, is recently  
52  
53 developed by measuring of PWV and blood pressure. And CAVI was not affected by  
54  
55 immediately blood pressure. As shown in Fig2, there was significant positive  
56  
57  
58  
59  
60

1  
2  
3  
4 correlation between CAVI and Hcy in all patients ( $r=0.42$ ,  $p<0.0001$ ).  
5

6 As shown in Table 1 and Table 2, there was significant difference about age  
7  
8 between groups. So next, we investigated the possible relationship between CAVI,  
9  
10 PWV with Hcy after adjusting the variable of age. Our results showed that there was  
11  
12 still significant correlation between CAVI and Hcy after adjustment for age ( $r=0.293$ ,  
13  
14  $p=0.008$ ). Also a positive correlation between PWV and Hcy was found after age  
15  
16 adjusted (CFPWV vs Hcy,  $r=0.282$ ,  $p=0.010$ ; CRPWV vs Hcy,  $r=0.462$ ,  $p<0.001$ ;  
17  
18 respectively).  
19  
20  
21  
22  
23  
24  
25

### 26 *3.3 Multiple linear regression analysis*

27

28 Multiple linear regressions were used to estimate the coefficients of the linear  
29  
30 equation, involving independent variables that affected the value of CAVI. Our results  
31  
32 showed that Hcy, BMI, and age were independent influencing factors of CAVI  
33  
34 ( $\beta=0.421$ ,  $p=0.001$ ;  $\beta= -0.309$ ,  $p=0.006$ ;  $\beta=0.297$ ,  $p=0.012$ ; respectively).  
35  
36  
37  
38  
39  
40  
41  
42  
43  
44  
45  
46  
47  
48  
49  
50  
51  
52  
53  
54  
55  
56  
57  
58  
59  
60

#### 4. Discussion

In the present study, we found that there was positive correlation between Hcy and CAVI in vascular-related diseases. CAVI and PWV were higher in patients with Hcy  $\geq 15\mu\text{mol/L}$ , and Hcy was an independent influencing factor of CAVI in vascular-related diseases.

An increase in arterial stiffness is not only a pathological status of hypertension, diabetes and coronary artery disease but also a strong predictor for the cardiovascular morbidity and mortality caused by these diseases. With the increasing of arterial stiffness, the incidence of hypertension, coronary heart disease increases. And arterial stiffness can be measured by pulse wave velocity (PWV) suggested by European Society of Hypertension/European Society of Cardiology guidelines. A lot of studies have showed the effect of PWV in the evaluation of arterial stiffness of vascular diseases. Aortic PWV was increasing in patients with diabetes mellitus or end-stage renal disease, indicating a higher arterial stiffness compared with health persons [13]. A research of 710 hypertension patients revealed that aortic PWV is a useful marker and predictor of cardiovascular risk in these subjects [14]. Recently, in a prospective study of general Danish population, the investigator found that aortic PWV was a useful predictor for cardiovascular outcomes above and beyond traditional cardiovascular risk factors such as 24-hour mean blood pressure [15]. However, PWV itself is essentially dependent on blood pressure, especially immediate blood pressure. Cardio-ankle vascular index (CAVI), a new index of arterial stiffness, is derived from stiffness parameter  $\beta$ , which is detected by carotid ultrasonic measurement [16].

1  
2  
3  
4 CAVI is a new evaluation index of arterial stiffness independent of immediate  
5  
6 blood pressure. Recent studies have showed the role of CAVI in the prediction of  
7  
8 vascular events in vascular-related diseases such as metabolic syndrome (MS),  
9  
10 diabetes, CAD, and so on. In MS patients, there was significant positive correlation  
11  
12 between CAVI and waist circumference, and CAVI increased significantly with the  
13  
14 number of metabolic syndrome components [17]. In another MS study, they found  
15  
16 that CAVI was significantly decreased after 3-month period weight-reduction therapy  
17  
18 through diet and exercise, so the determination of arterial stiffness by CAVI may be  
19  
20 useful for evaluating and managing the CVD risks of MS patients [18]. In a  
21  
22 comparative study, researchers showed that the diagnostic accuracy of CAD was  
23  
24 significantly higher in the CAVI than in the brachial ankle PWV, which suggested that  
25  
26 CAVI had increased performance over brachial ankle PWV in predicting the coronary  
27  
28 artery disease [16, 17]. Namekata showed that the CAVI method was a useful tool to  
29  
30 screen persons with moderate to advanced levels of arteriosclerosis. CAD is one of  
31  
32 fatal and disabling diseases, some researchers found that CAVI was significantly  
33  
34 correlated with percentage plaque area in coronary arterial disease [21]. A lot of  
35  
36 studies have showed that CAVI was a reliable evaluation index of vascular-related  
37  
38 diseases. Our present study showed that with the increasing numbers of  
39  
40 vascular-related diseases suffering, the level of CAVI was increasing (Table 1). And  
41  
42 we also found significant correlation between PWV and CAVI in the entire group  
43  
44 (CAVI &CF-PWV:  $r=0.382$ ,  $p<0.001$ ; CAVI &CR-PWV:  $r=0.225$ ,  $p=0.039$ ).  
45  
46  
47  
48  
49  
50  
51  
52  
53  
54

55  
56 Homocysteine (Hcy) is an independent risk factor of cardiovascular diseases.  
57  
58  
59  
60

1  
2  
3  
4 Hyperhomocysteinemia (HHcy) has been found in more than one half of patients with  
5  
6 hypertension. The possible mechanism of this process includes endothelial cell  
7  
8 damage, vascular endothelial dysfunction and enhanced oxidative stress[9,10]. Our  
9  
10 previous study showed that chronic hyperhomocysteinemia contributed to coronary  
11  
12 artery disease by inhibiting dysfunction of the coronary artery endothelium [11]. So  
13  
14 Hcy might damage the endothelium through complex mechanisms resulting  
15  
16 endothelial dysfunction. Also Hcy could promote the proliferation of smooth muscle  
17  
18 cells through inflammation and so on. Endothelial dysfunction and proliferation of  
19  
20 smooth muscle cells of arterial medium could lead to the increasing of arterial  
21  
22 stiffness. Previous study had showed positive correlation between Hcy and CAVI in  
23  
24 general population [12]. However, there was little research about the relationship  
25  
26 between Hcy and CAVI in patients with one more kinds of vascular-related diseases.  
27  
28 In the present study, we found that CAVI was positively correlated with Hcy even  
29  
30 after adjustment of other parameters. The similar result was also found between PWV  
31  
32 and Hcy. Hcy increases not only in hypertension patients but also in other vascular  
33  
34 diseases. Hcy participates in the pathophysiological process of these diseases.  
35  
36 Hyperhomocysteinemia was defined as the level of Hcy  $\geq 15\mu\text{mol/L}$ . Last, we  
37  
38 compared the arterial stiffness between HHcy group and patients with Hcy  $< 15\mu\text{mol/L}$ .  
39  
40 As shown in Table 2, the levels of PWV and CAVI were significantly higher in group  
41  
42 with Hcy  $\geq 15\mu\text{mol/L}$  than that in group with Hcy  $< 15\mu\text{mol/L}$ . Finally, our research  
43  
44 showed that Hcy was an independent influencing factor of CAVI. Our study suggested  
45  
46 that CAVI was higher in HHcy patients, so treatment should be made to lower  
47  
48  
49  
50  
51  
52  
53  
54  
55  
56  
57  
58  
59  
60

1  
2  
3  
4 homocysteine in HHcy patients in order to reduce arterial stiffness.  
5

6  
7       However, there were some limitations in the study: the small sample size, cases,  
8  
9 and controls were not perfectly matched. Also some patients with hypertension and  
10  
11 (or) CAD had oral medication such as amlodipine before coming to the hospital, this  
12  
13 might affect our results to a certain extent. So thorough research should be  
14  
15 investigated in future. However, our study suggested that CAVI was a useful  
16  
17 evaluation index for arterial stiffness, and there was positive correlation between  
18  
19 CAVI and Hcy.  
20  
21  
22  
23

24       In conclusion, our study showed that CAVI and Hcy are closely associated  
25  
26 among vascular-related diseases. More studies should be made to investigate the role  
27  
28 of Hcy in the development of arterial stiffness.  
29  
30  
31  
32  
33  
34  
35  
36  
37  
38  
39  
40  
41  
42  
43  
44  
45  
46  
47  
48  
49  
50  
51  
52  
53  
54  
55  
56  
57  
58  
59  
60

### Acknowledgments

This work was supported by grants from the capital health development special study to HY Wang (No. 2011-4026-02), and the hospital fund of Peking University Shougang Hospital to Hongyu Wang (No. 2010-Y002) and Jinbo Liu (No. 2012Y04).

### Disclosures

No conflicts of interest, financial or otherwise, are declared by the authors.

**Ethics approval:** From the ethics committee of the Health Science Center, Peking University, China.

### Contributorship

Dr. Jinbo Liu, Qi Wang, Dr. Hongwei Zhao, Dr. Hongyan Shi, Dr. Xiaolan Yu, Dr. Xiaobao Fu had contribution to the collection of information of patients. Pro. Wang designed the present study, and Pro. Wang and Dr. Liu were Equal contributors to the this paper.

### Funding

Funded by The capital health development special study

### Data Sharing

No additional data available.

### Competing Interests

None



## References

- [1] Cavalcante JL, Lima JAC, Redheuil A, Al-Mallah MH. Aortic stiffness. *J Am Coll Cardiol* 2011; 57:1511-22.
- [2] Mancia G, De Backer G, Dominiczak A, et al. 2007 guidelines for the management of arterial hypertension: the Task Force for the Management of Arterial Hypertension of the European Society of Hypertension (ESH) and of the European Society of Cardiology (ESC). *J Hypertens* 2007;25:1105– 87.
- [3] Ni Y, Wang H, Hu D, Zhang W. The Relationship between Pulse Wave Velocity and Pulse Pressure in Chinese Patients with Essential Hypertension. *Hypertens Res* 2003;26:871-874.
- [4] Wang H, Zhang W, Gong L, Hu D, et al. Study of Relationship between Large Artery Distensibility and Left Ventricular Hypertrophy in Patients with Essential Hypertension. *Chin J Cardiol*, 2000;28:177-180.
- [5] Shirai K, Utino J, Otsuka K, Takata M. A novel blood pressure-independent arterial wall stiffness parameter: cardio-ankle vascular index (CAVI). *J Atheroscler Thromb* 2006, 13:101-107.

- 1  
2  
3  
4 [6] Kim KJ, Lee BW, Kim HM, Shin JY, Kang ES, Cha BS, et al. Associations  
5  
6 between cardio-ankle vascular index and microvascular complications in type 2  
7  
8 diabetes mellitus patients. *J Atheroscler Thromb* 2011;27;18(4):328-36.  
9  
10  
11 [7] Takaki A, Ogawa H, Wakeyama T, Iwami T, Kimura M, Hadano Y, et al.  
12  
13 Cardio-ankle vascular index is a new noninvasive parameter of arterial  
14  
15 stiffness. *Circ J* 2007;71(11):1710-4.  
16  
17  
18 [8] Antoniadou C, Antonopoulos AS, Tousoulis D, Marinou K, Stefanadis C.  
19  
20 Homocysteine and coronary atherosclerosis: from folate fortification to the recent  
21  
22 clinical trials. *European Heart Journal* (2009) 30, 6–15  
23  
24  
25 [9] Topal G, Brunet A, Millanvoye E, Boucher JL, Rendu F, Devynck MA, et al.  
26  
27 Homocysteine induces oxidative stress by uncoupling of NO synthase activity  
28  
29 through reduction of tetrahydrobiopterin. *Free Radic Biol Med*, 2004; 36: 1532-41.  
30  
31  
32 [10] Mezei C, Schumann J, Wagner A, and Gross P. Effects of homocysteine on the  
33  
34 levels of caveolin-1 and eNOS in caveolae of human coronary artery endothelial  
35  
36 cells. *Atherosclerosis*, 2007; 190: 256-63.  
37  
38  
39 [11] He L, Zeng H, Li F, Feng J, Liu S, Liu J, et al. Homocysteine impairs coronary  
40  
41 artery endothelial function by inhibiting tetrahydrobiopterin in patients with  
42  
43 hyperhomocysteinemia. *Am J Physiol Endocrinol Metab* 2010; 299: E1061–E1065.  
44  
45  
46 [12] Kadota K, Takamura N, Aoyagi K, Yamasaki H, Usa T, Nakazato M, et al.  
47  
48 Availability of cardio-ankle vascular index (CAVI) as a screening tool for  
49  
50 atherosclerosis. *Cir J* 2008; 72: 304-308.  
51  
52  
53 [13] Aoun S, Blacher J, Safar ME, Mourad JJ. Diabetes mellitus and renal  
54  
55  
56  
57  
58  
59  
60

- 1  
2  
3 failure:effects on large artery stiffness. *Journal of Human Hypertension* 2001;  
4  
5  
6 15:693-700.  
7  
8  
9 [14] Blacher J, Asmar R, Djane S, London GM, Safar ME. Aortic pulse wave velocity  
10  
11 as a marker of cardiovascular risk in hypertensive patients. *Hypertension* 1999; 33:  
12  
13 1111-1117.  
14  
15  
16 [15] Hansen TW, Staessen JA, Torp-Pedersen C , Rasmussen S, Thijs L, Ibsen H, et al.  
17  
18 Prognostic value of aortic pulse wave velocity as index of arterial stiffness in the  
19  
20 general population. *Circulation*. 2006;113:664-670.  
21  
22  
23 [16] Takaki A, Ogawa H, Wakeyama T, Iwami T, Kimura M, Hadano Y, et al.  
24  
25 Cardio-Ankle Vascular Index is a New Noninvasive Parameter of Arterial  
26  
27 Stiffness. *Circ J* 2007;71:1710-1714.  
28  
29  
30 [17]Liu H, Zhang X, Feng X, Li J, Hu M, Yambe T. Effects of metabolic syndrome  
31  
32 on cardio-ankle vascular index in middle-aged and elderly Chinese. *Metab Syndr*  
33  
34 *Relat Disord* 2011 Apr;9(2):105-10. Epub 2010 Nov 22.  
35  
36  
37 [18] Satoh N, Shimatsu A, Kato Y, Araki R, Koyama K, Okajima T, et al. Evaluation  
38  
39 of the cardio-ankle vascular index, a new indicator of arterial stiffness independent  
40  
41 of blood pressure, in obesity and metabolic syndrome. *Hypertens Res*  
42  
43 2008;31(10):1921-30.  
44  
45  
46 [19]Horinaka S, Yabe A, Yagi H, Ishimura K, Hara H, Iemua T, Matsuoka H.  
47  
48 Comparison of atherosclerotic indicators between cardio ankle vascular index and  
49  
50 brachial ankle pulse wave velocity. *Angiology* 2009 Aug-Sep;60(4):468-76. Epub  
51  
52 2008 Nov 17.  
53  
54  
55  
56  
57  
58  
59  
60

1  
2  
3  
4 [20]Takaki A, Ogawa H, Wakeyama T, Iwami T, Kimura M, Hasano Y, et al.

5  
6 Cardio-ankle vascular index is superior to brachial-ankle pulse wave velocity as an  
7  
8 index of arterial stiffness. *Hypertens Res* 2008 Jul;31(7):1347-55.

9  
10  
11 [21]Horinaka S, Yabe A, Yagi H, Ishimura K, Hara H, Iemura T, et al. Cardio-ankle

12  
13 vascular index could reflect plaque burden in the coronary artery. *Angiology* 2011  
14  
15 Jul;62(5):401-8. Epub 2011 Mar 18.

16  
17  
18  
19 **Figure legends**

20  
21 Figure 1 Relationship between CF-PWV and Hcy (Fig 1A) , CR-PWV and Hcy (Fig  
22  
23 1B) in the entire study group. Hcy: homocysteine. CF-PWV: carotid-femoral pulse  
24  
25 wave velocity. CR-PWV: carotid-radial pulse wave velocity.

26  
27  
28  
29  
30  
31 Figure 2 Relationship between CAVI and Hcy in the entire study group. Hcy:  
32  
33 homocysteine. CAVI: cardio-ankle vascular index.

Table 1 Clinical characteristics in different groups according to the numbers of vascular-related diseases.

| Characteristics        | Group 0<br>N=12 | Group 1<br>N=33 | Group 2<br>N=34 | Group 3<br>N=9 | <i>p</i> values |
|------------------------|-----------------|-----------------|-----------------|----------------|-----------------|
| Age, y                 | 54.4±9.5        | 63.5±13.1       | 73.2±10.0       | 76.1±10.3      | <0.01           |
| BMI, kg/m <sup>2</sup> | 22.4±3.3        | 23.9±3.9        | 23.3±4.4        | 25.7±2.6       | 0.32            |
| LDL, mmol/L            | 1.82±0.4        | 1.83±0.6        | 1.71±0.4        | 1.84±0.2       | 0.759           |
| HDL, mmol/L            | 1.90±2.9        | 0.95±0.2        | 1.01±0.3        | 1.00±0.25      | 0.078           |
| Hs-CRP, mg/L           | 4.73±10.8       | 8.14±15.3       | 10.79±15.3      | 17.2±35.8      | 0.496           |
| HbA1c %                | 5.78±0.3        | 5.92±0.5        | 5.86±0.3        | 5.98±1.7       | 0.917           |
| Hcy (umol/L)           | 11.0±2.8        | 19.0±9.1        | 16.7±6.4        | 21.1±8.5       | 0.006           |
| Urinary Microalbumin   | 3.66±4.4        | 16.69±39.0      | 7.50±10.9       | 13.90±22.4     | 0.522           |
| Heartrate              | 75.5±9.6        | 72.4±13.3       | 74.7±13.4       | 69.4±8.5       | 0.621           |
| ABI                    | 1.10±0.13       | 1.10±0.09       | 1.06±0.14       | 1.02±0.21      | 0.284           |
| SBP, mmHg              | 126.0±13.8      | 138.6±19.8      | 145.3±23.1      | 154.3±23.4     | 0.012           |
| DBP, mmHg              | 79.5±7.2        | 81.7±9.5        | 82.7±9.7        | 86.1±9.9       | 0.479           |
| CF-PWV                 | 9.17±2.6        | 12.33±3.0       | 13.03±2.8       | 13.85±1.86     | <0.001          |
| CR-PWV                 | 9.34±0.92       | 10.12±1.98      | 9.8±2.21        | 10.29±2.96     | 0.648           |
| CAVI                   | 7.51±0.9        | 8.23±2.4        | 9.09±2.3        | 9.34±2.0       | 0.08            |

CAD: coronary artery disease. ASO: arteriosclerosis obliterans. Group 0: without diseases of hypertension, CAD, ASO; group 1: with one of diseases of hypertension, CAD, ASO; group 2: with two of diseases of hypertension, CAD, ASO; group 3: with all diseases of hypertension, CAD, ASO; BMI: body mass index. LDL: low-density lipoprotein. HDL: high-density cholesterol. CRP: C-reactive protein. Hcy: homocysteine. ABI: ankle-brachial index. SBP: systolic blood pressure; DBP: diastolic blood pressure. CF-PWV: carotid-femoral pulse wave velocity. CR-PWV: carotid-radial pulse wave velocity. CAVI: cardio-ankle vascular index. The differences between groups were analyzed by one-way ANOVA.

Table 2 Clinical characteristics in patients with Hcy<15umol/ and Hcy≥15umol/.

| Characteristics        | Hcy<15umol/L<br>(n=43) | Hcy≥15umol/L<br>(n=45) | <i>p</i> values |
|------------------------|------------------------|------------------------|-----------------|
| Age, y                 | 61.9±13.0              | 71.9±11.5              | <0.01           |
| BMI, kg/m <sup>2</sup> | 23.9±4.2               | 23.3±3.8               | 0.48            |
| Hypertension, No(%)    | 26(60.5)               | 31(68.9)               | 0.41            |
| CAD, No(%)             | 18(41.2)               | 25(55.6)               | 0.2             |
| ASO, No(%)             | 8(18.6)                | 17(37.8)               | 0.03            |
| LDL, mmol/L            | 1.72±0.4               | 1.84±0.6               | 0.31            |
| HDL, mmol/L            | 1.19±1.5               | 1.04±0.3               | 0.53            |
| Hs-CRP, mg/L           | 7.70±0.17              | 11.34±19.5             | 0.36            |
| HbA1c %                | 5.80±0.3               | 5.96±0.8               | 0.34            |
| Hcy umol/L             | 11.89±2.0              | 22.19±8.0              | <0.001          |
| Urinary Microalbumin   | 4.35±4.3               | 17.58±35.0             | 0.057           |
| Heartrate              | 72.0±9.7               | 74.9±14.5              | 0.28            |
| ABI                    | 1.09±0.12              | 1.06±0.13              | 0.23            |
| SBP, mmHg              | 134.1±18.2             | 147.0±23.2             | 0.005           |
| DBP, mmHg              | 81.2±8.4               | 83.1±10.0              | 0.36            |
| CF-PWV                 | 10.8±2.5               | 13.7±3.0               | <0.001          |

|        |          |          |       |
|--------|----------|----------|-------|
| CR-PWV | 9.2±1.6  | 10.6±2.1 | 0.001 |
| CAVI   | 7.79±2.1 | 9.30±2.1 | 0.001 |

Results were shown as mean  $\pm$ SD unless stand otherwise. CAD: coronary artery disease. ASO: arteriosclerosis obliterans. BMI: body mass index. LDL: low-density lipoprotein. HDL: high-density cholesterol. CRP: C-reactive protein. Hcy: homocysteine. ABI: ankle-brachial index. SBP: systolic blood pressure; DBP: diastolic blood pressure. CF-PWV: carotid-femoral pulse wave velocity. CR-PWV: carotid-radial pulse wave velocity. CAVI: cardio-ankle vascular index. The difference between groups were analyzed by Student' *t*-test.

Fig 1

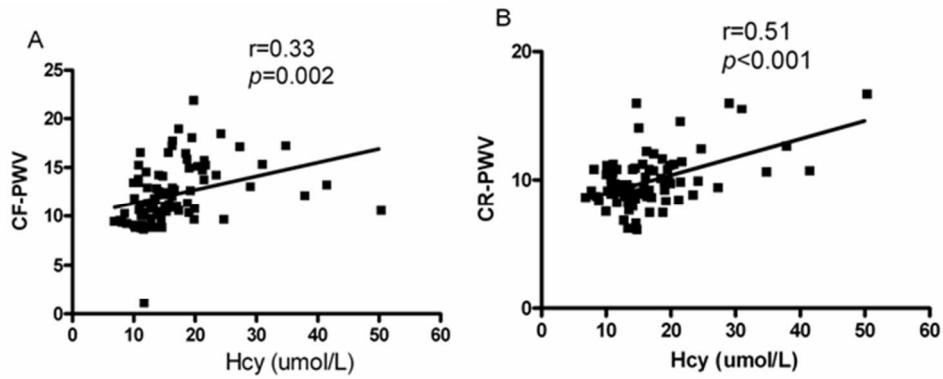

Figure 1 Relationship between CF-PWV and Hcy (Fig 1A) , CR-PWV and Hcy (Fig 1B) in the entire study group. Hcy: homocysteine. CF-PWV: carotid-femoral pulse wave velocity. CR-PWV: carotid-radial pulse wave velocity.

58x27mm (300 x 300 DPI)



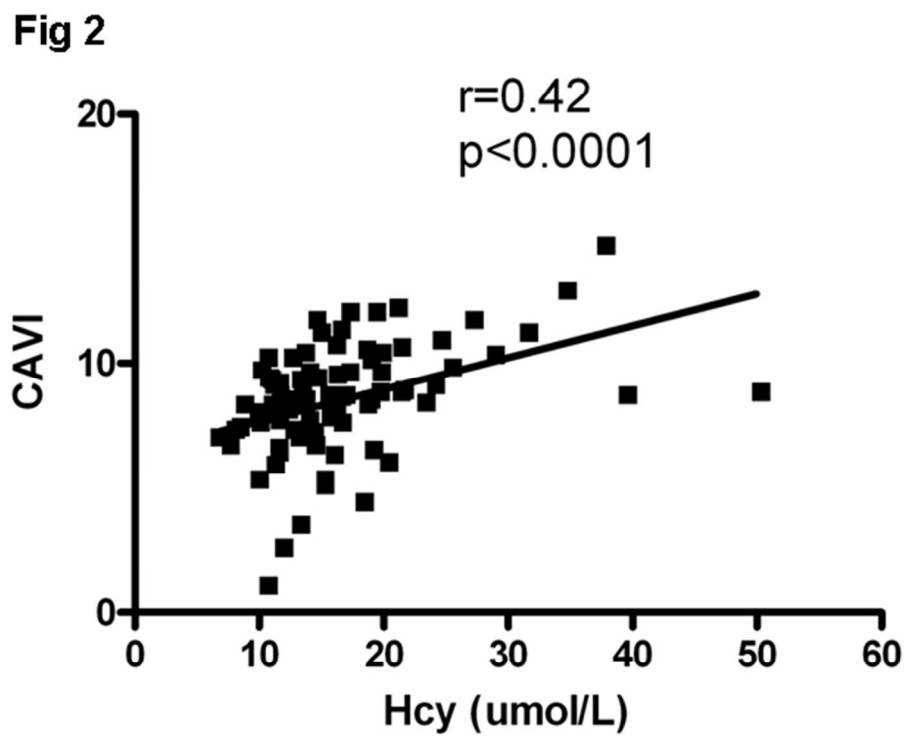

32  
33  
34  
35  
36  
37  
38  
39  
40  
41  
42  
43  
44  
45  
46  
47  
48  
49  
50  
51  
52  
53  
54  
55  
56  
57  
58  
59  
60

Figure 2 Relationship between CAVI and Hcy in the entire study group. Hcy: homocysteine. CAVI: cardio-ankle vascular index.  
57x43mm (300 x 300 DPI)



**Descriptive study of possible link between cardio-ankle vascular index and homocysteine in vascular-related diseases**

|                                 |                                                                                                                                                                                                                                                                                                                                                                                                                                                                                                                                                                        |
|---------------------------------|------------------------------------------------------------------------------------------------------------------------------------------------------------------------------------------------------------------------------------------------------------------------------------------------------------------------------------------------------------------------------------------------------------------------------------------------------------------------------------------------------------------------------------------------------------------------|
| Journal:                        | <i>BMJ Open</i>                                                                                                                                                                                                                                                                                                                                                                                                                                                                                                                                                        |
| Manuscript ID:                  | bmjopen-2012-002483.R1                                                                                                                                                                                                                                                                                                                                                                                                                                                                                                                                                 |
| Article Type:                   | Research                                                                                                                                                                                                                                                                                                                                                                                                                                                                                                                                                               |
| Date Submitted by the Author:   | 21-Jan-2013                                                                                                                                                                                                                                                                                                                                                                                                                                                                                                                                                            |
| Complete List of Authors:       | Liu, Jinbo; Department of Endocrinology<br>Wang, Hongyu; Peking University Shougang Hospital, Department of Vascular Medicine<br>Wang, Qi; Peking University Shougang Hospital, Department of Vascular Medicine<br>Zhao, Hongwei; Peking University Shougang Hospital, Department of Vascular Medicine<br>Shi, Hongyan; Peking University Shougang Hospital, Department of Vascular Medicine<br>Yu, Xiaolan; Peking University Shougang Hospital, Department of Vascular Medicine<br>Fu, Xiaobao; Peking University Shougang Hospital, Department of Vascular Medicine |
| <b>Primary Subject Heading</b>: | Cardiovascular medicine                                                                                                                                                                                                                                                                                                                                                                                                                                                                                                                                                |
| Secondary Subject Heading:      | Cardiovascular medicine                                                                                                                                                                                                                                                                                                                                                                                                                                                                                                                                                |
| Keywords:                       | Coronary heart disease < CARDIOLOGY, VASCULAR MEDICINE, Hypertension < CARDIOLOGY                                                                                                                                                                                                                                                                                                                                                                                                                                                                                      |
|                                 |                                                                                                                                                                                                                                                                                                                                                                                                                                                                                                                                                                        |

SCHOLARONE™  
Manuscripts

1  
2  
3  
4 Descriptive study of possible link between cardio-ankle vascular index  
5  
6 and homocysteine in vascular-related diseases  
7  
8

9 Hongyu Wang<sup>\*,1,#</sup>, Jinbo Liu<sup>\*,1</sup>, Qi Wang<sup>1</sup>, Hongwei Zhao<sup>1</sup>, Hongyan Shi<sup>1</sup>,  
10  
11 Xiaolan Yu<sup>1</sup>, Xiaobao Fu<sup>1</sup>  
12  
13

14  
15 <sup>1</sup> Department of Vascular Medicine; Peking University Shougang Hospital, Beijing  
16  
17 100144, P. R. of China.  
18  
19

20  
21 \* Equal contributors  
22  
23

24  
25 #Corresponding Author: Hongyu Wang, Vascular Medicine; Peking University  
26  
27 Shougang Hospital; Beijing 100144, P. R. of China.  
28  
29

30  
31 Tel (Fax): +8610-57830226; +8610-57830226  
32

33  
34 Email: [hongyuwang@188.com](mailto:hongyuwang@188.com)  
35  
36

37  
38 *Running title:* CAVI and Homocysteine  
39  
40  
41  
42  
43  
44  
45  
46  
47  
48  
49  
50  
51  
52  
53  
54  
55  
56  
57  
58  
59  
60

## Abstract

**Objectives:** Cardio-ankle vascular index (CAVI) is a new index of arterial stiffness independent of immediate blood pressure. Homocysteine (Hcy) is an independent risk factor for vascular diseases. The aim of this study was to investigate the relationship between Hcy and CAVI in vascular-related diseases.

**Design:** Descriptive Research.

**Participants:** 88 patients (M/F 46/42) with or without hypertension, coronary artery disease or arteriosclerosis obliterans were enrolled into our study. They were divided into two groups according to the level of Hcy.

**Methods:** CAVI, carotid-femoral pulse wave velocity (CFPWV) and carotid-radial pulse wave velocity (CRPWV) were measured by VS-1000 and Complior apparatus.

**Results:** There was significant correlation between Hcy and CF-PWV, CR-PWV, CAVI in the entire group ( $r=0.33$ ,  $p=0.002$ ;  $r=0.51$ ,  $p<0.001$ ;  $r=0.42$ ,  $p<0.001$ ; respectively). And there was significant correlation between Hcy and CF-PWV, CR-PWV, CAVI in the vascular-related disease group ( $r=0.23$ ,  $p=0.048$ ;  $r=0.51$ ,  $p<0.001$ ;  $r=0.392$ ,  $p=0.001$ ; respectively). The level of Hcy was significantly higher in patients with one or more vascular diseases than in patients without vascular diseases. The levels of CF-PWV, CR-PWV, and CAVI were significantly higher in Hcy  $\geq 15\mu\text{mol/L}$  group than in Hcy  $<15\mu\text{mol/L}$  group ( $13.7\pm 3.0$  vs  $10.8\pm 2.5$ ,  $p<0.001$ ;  $10.6\pm 2.1$  vs  $9.2\pm 1.6$ ,  $p=0.001$ ;  $9.30\pm 2.1$  vs  $7.79\pm 2.1$ ,  $p=0.001$ ; respectively). Multiple linear regression showed that Hcy, body mass index (BMI), and age were independent associating factors of CAVI in the entire study group ( $\beta=0.421$ ,  $p=0.001$ ;

1  
2  
3  
4  $\beta = -0.309, p=0.006; \beta=0.297, p=0.012;$  respectively). And Hcy, BMI, and age were  
5  
6 independent influencing factors of CAVI in vascular-related disease group ( $\beta=0.434,$   
7  
8  $p=0.001; \beta = -0.331, p=0.009; \beta=0.288, p=0.022;$  respectively).

10  
11 **Conclusions:** CAVI was positively correlated with homocysteine in vascular-related  
12  
13 diseases.

14  
15  
16 *Keywords:* Cardio-ankle vascular index; Homocysteine; Vascular-related diseases  
17  
18  
19  
20  
21  
22  
23  
24  
25  
26  
27  
28  
29  
30  
31  
32  
33  
34  
35  
36  
37  
38  
39  
40  
41  
42  
43  
44  
45  
46  
47  
48  
49  
50  
51  
52  
53  
54  
55  
56  
57  
58  
59  
60

1  
2  
3 Article summary  
4

5 1. Article focus  
6

7 To investigate the relationship between homocysteine (Hcy) and Cardio-ankle  
8 vascular index (CAVI) in vascular-related diseases.  
9

10  
11 2. Key messages

12 Homocysteine was positively correlated with CAVI in vascular-related diseases.

13 3. Strengths and limitations of this study

14  
15 Strengths of this study: our present study firstly showed the relationship between  
16 Hcy and CAVI in vascular-related diseases.  
17  
18

19  
20 Limitations of this study: the small sample size, cases, and controls were not  
21 perfectly matched.  
22  
23  
24  
25  
26  
27  
28  
29  
30  
31  
32  
33  
34  
35  
36  
37  
38  
39  
40  
41  
42  
43  
44  
45  
46  
47  
48  
49  
50  
51  
52  
53  
54  
55  
56  
57  
58  
59  
60

## 1. Introduction

Arterial stiffness is a strong predictor of future cardiovascular events and all-cause mortality. And it is one of the earliest detectable manifestations of adverse structural and functional changes within the vessel wall [1]. Arterial stiffness can be measured by pulse wave velocity (PWV), which is considered as the gold standard method suggested by European Society of Hypertension/European Society of Cardiology guidelines [2]. And our previous studies also showed that PWV was positively correlated with pulse pressure and it was increased in hypertension patients with left ventricular hypertrophy [3, 4]. However, PWV itself is essentially dependent on blood pressure especially immediate blood pressure. Cardio-ankle vascular index (CAVI), a new index of arterial stiffness independent of blood pressure, is recently developed by measuring of PWV and blood pressure [5]. Recent studies have showed that CAVI was a reliable index of arterial stiffness in many vascular-related diseases [6,7].

Homocysteine has been considered as an independent risk factor for atherosclerosis [8]. The possible mechanism of this process includes endothelial cell damage, vascular endothelial dysfunction and enhanced oxidative stress. Recent studies showed that homocysteine caused endothelial dysfunction through inhibiting the reactions between endothelial nitric oxide synthase (eNOS) and tetrahydrobiopterin (BH4) [9,10]. Our previous study showed that chronic hyperhomocysteinemia contributed to coronary artery disease by inhibiting dysfunction of the coronary artery endothelium [11]. Increased arterial stiffness

1  
2  
3  
4 resulted from many factors such as endothelial dysfunction, smooth muscle cells  
5  
6 proliferation, thickening of vascular wall. Kadota et al had showed positive  
7  
8 correlation between Hcy and CAVI in general population [12]. However, the  
9  
10 relationship between CAVI and Hcy in vascular-related diseases such as hypertension,  
11  
12 coronary artery disease (CAD), and arteriosclerosis obliterans (ASO) was still  
13  
14 unknown, especially in patients with one more kinds of vascular-related diseases. In  
15  
16 the present study, we investigated the possible link between CAVI and homocysteine  
17  
18 in vascular-related diseases such as hypertension, CAD and ASO.  
19  
20  
21  
22  
23  
24  
25  
26

## 27 **2. Materials and methods**

### 28 *2.1 Subjects*

29  
30  
31 88 patients (M/F: 46/42) with or without hypertension, CAD or ASO from  
32  
33 vascular medicine department of Peking University Shougang Hospital from February  
34  
35 2012 to April 2012 were enrolled into our study. There were 57 patients with  
36  
37 hypertension, 43 with CAD, and 25 patients with ASO in the whole study group. And  
38  
39 there were 12 patients without hypertension, CAD and ASO but suffering one of these  
40  
41 two diseases, acute upper respiratory tract infection or acute gastritis.  
42  
43  
44  
45

46  
47 Hypertension was defined as known cases of hypertension or blood pressure  
48  
49 measurement  $\geq 140/90$ mmHg in three occasions at rest. CAD or ASO was defined as  
50  
51 the narrowing or blockage of coronary artery or lower extremity artery diagnosed by  
52  
53 angiography. Hyperhomocysteinemia was defined as the level of plasma Hcy  $\geq$   
54  
55 15umol/L[11].  
56  
57  
58  
59  
60



1  
2  
3  
4  
5  
6  
7  
8  
9  
10  
11  
12  
13  
14  
15  
16  
17  
18  
19  
20  
21  
22  
23  
24  
25  
26  
27  
28  
29  
30  
31  
32  
33  
34  
35  
36  
37  
38  
39  
40  
41  
42  
43  
44  
45  
46  
47  
48  
49  
50  
51  
52  
53  
54  
55  
56  
57  
58  
59  
60

Enrolled patients were divided into four groups according to numbers of suffering vascular-related diseases. Also they were divided into two groups according to level of Hcy (Hcy <15umol/L group, N=43, and Hcy ≥15umol/L group, N=45). All participants gave their written informed consent. This study was approved by the ethics committee of the Health Science Center, Peking University.

### 2.2 *Pulse wave velocity measurement*

Arterial stiffness was evaluated by measuring automatic PWV using the Complior apparatus. The basic principle of PWV assessment is that pressure pulse generated by ventricular ejection is propagated along the arterial system at a speed determined by elasticity of the arterial wall. Knowing the distance and pulse transit time, the velocity can be calculated. Patients were placed in recumbent position and, after a 10-minute rest, underwent PWV measurement and carotid-femoral PWV (CFPWV) and carotid-radial PWV (CRPWV) was obtained automatically. CFPWV and CRPWV are both reliable index for arterial stiffness of vascular diseases [2,26]. And we chose the right PWV for analysis.

### 2.3 *The assessment of CAVI*

CAVI was recorded using a VaseraVS-1000 vascular screening system (Fukuda Denshi, Tokyo, Japan) with the participant resting in a supine position. ECG electrodes were placed on both wrists, a microphone for detecting heart sounds was placed on the sternum, and cuffs were wrapped around both the arms and ankles.

1  
2  
3  
4 After automatic measurements, obtained data were analyzed by software, and the  
5  
6 value of CAVI was obtained automatically [16]. And we chose the right CAVI for  
7  
8 analysis.  
9

#### 10 11 12 13 14 *2.4 Laboratory measurements*

15  
16 Blood samples were drawn from an antecubital vein in the morning after  
17  
18 overnight fasting and collected into vacuum tubes containing EDTA for the  
19  
20 measurement of plasma lipid and lipoprotein levels. Total cholesterol, high-density  
21  
22 lipoprotein (HDL) cholesterol, and triglyceride levels were analyzed by colorimetric  
23  
24 enzymatic assays with the use of an autoanalyzer (HITACHI-7170, Hitachi, Tokyo,  
25  
26 Japan). Low-density lipoprotein cholesterol (LDL-C) levels were calculated. Fasting  
27  
28 plasma glucose, homocysteine, hs-C reactive protein were also determined by  
29  
30 colorimetric methods of related metabolic products using the same autoanalyzer at the  
31  
32 central chemistry laboratory of the Peking University Shougang Hospital.  
33  
34  
35  
36  
37  
38  
39  
40

#### 41 42 *2.5 Statistical analysis*

43  
44 SPSS 13.0 was used as statistical software in the present study. The differences  
45  
46 between groups were analyzed by Student' *t*-test and one-way ANOVA. Proportions  
47  
48 were analyzed by  $\chi^2$ -test. Correlation coefficient was done to find linear relation  
49  
50 between different variables using Spearman correlation coefficient. Multiple linear  
51  
52 regressions were used to estimate the coefficients of the linear equation, involving  
53  
54 independent variables that affected the value of the dependent variables. Values were  
55  
56  
57  
58  
59  
60

1  
2  
3  
4 shown as mean  $\pm$  SD unless stand otherwise.  $p < 0.05$  (2-tailed) was considered  
5  
6 statistically significant.  
7  
8  
9

### 10 11 **3. Results**

#### 12 13 *3.1 Clinical characteristics of the study participants*

14  
15  
16 The clinical characteristics of study participants are shown in Table 1. Among  
17  
18 these subjects, 33 patients had only one of these three vascular-related diseases, 34  
19  
20 patients had two of these three vascular-related diseases, 9 patients had all of these  
21  
22 three diseases, and 12 subjects with none of vascular-related diseases. Our results  
23  
24 showed that with the increasing numbers of suffered vascular-related diseases, the  
25  
26 level of Hcy was increasing. Similar results were also found in the parameters of  
27  
28 CF-PWV and CAVI. However, we found there was significant difference about age  
29  
30 between these four groups.  
31  
32  
33  
34  
35

36  
37 Next, we divided subjects into two groups according to the level of Hcy. As  
38  
39 shown in Table 2, the level of CAVI was significant higher in patients with Hcy  $\geq$   
40  
41 15umol/L than in group with Hcy < 15umol/L. The similar result was also found in  
42  
43 another evaluation index of arterial stiffness-PWV. However, there was significant  
44  
45 difference about age and sex between these two groups.  
46  
47  
48  
49  
50

#### 51 52 *3.2 Pearson correlations between PWV, CAVI and Hcy in the entire study group*

53  
54 PWV is a golden evaluation of arterial stiffness of vascular diseases. There are  
55  
56 some kinds of PWV according to different arteries, such as carotid-femoral pulse  
57  
58  
59  
60

1  
2  
3  
4 wave velocity (CF-PWV), and carotid-radial pulse wave velocity (CR-PWV). CFPWV  
5  
6 and CRPWV are both reliable index for arterial stiffness of vascular diseases [2,26].  
7  
8  
9 As shown in Fig 1. CF-PWV was positively correlated with Hcy in entire group  
10  
11 ( $r=0.33$ ,  $p=0.002$ , Fig 1A). There was also significant positive correlation between  
12  
13 CR-PWV and Hcy in all patients ( $r=0.51$ ,  $p<0.001$ , Fig 1B). In addition, our results  
14  
15 showed that there was significant correlation between Hcy and CF-PWV, CR-PWV in  
16  
17 the vascular-related disease group ( $r=0.23$ ,  $p=0.048$ ;  $r=0.51$ ,  $p<0.001$ , respectively).  
18  
19

20  
21 CAVI, a new index of arterial stiffness independent of blood pressure, is recently  
22  
23 developed by measuring of PWV and blood pressure. And CAVI was not affected by  
24  
25 immediate blood pressure. As shown in Fig2, there was significant positive correlation  
26  
27 between CAVI and Hcy in all patients ( $r=0.42$ ,  $p<0.0001$ ). Also we found there was  
28  
29 significant correlation between Hcy and CAVI in the vascular-related disease group  
30  
31 ( $r=0.392$ ,  $p=0.001$ ). However, there was no significant correlation between Hcy and  
32  
33 CF-PWV, CR-PWV, CAVI in patients without vascular-related diseases in the present  
34  
35 study ( $r=0.14$ ,  $p=0.661$ ;  $r=0.152$ ,  $p=0.620$ ;  $r=0.056$ ,  $p=0.855$ ; respectively).  
36  
37  
38  
39

40  
41 As shown in Table 1 and Table 2, there was significant difference about age or  
42  
43 sex between groups. So next, we investigated the possible relationship between CAVI,  
44  
45 PWV and Hcy after adjusting the variable of age or sex. Our results showed that there  
46  
47 was still significant correlation between CAVI and Hcy after adjustment for age in the  
48  
49 entire study group ( $r=0.293$ ,  $p=0.008$ ). Also a positive correlation between PWV and  
50  
51 Hcy was found after age adjusted in the entire study group (CFPWV vs Hcy,  $r=0.282$ ,  
52  
53  $p=0.010$ ; CRPWV vs Hcy,  $r=0.462$ ,  $p<0.001$ ; respectively). In addition, there was  
54  
55  
56  
57  
58  
59  
60

1  
2  
3  
4 significant correlation between Hcy and CF-PWV, CR-PWV, CAVI after age and sex  
5  
6 adjusted in the entire study group ( $r=0.26$ ,  $p=0.022$ ;  $r=0.38$ ,  $p=0.001$ ;  $r=0.27$ ,  $p=0.014$ ;  
7  
8 respectively).

9  
10  
11 There were 12 patients without vascular-related diseases in the entire study group,  
12  
13 so in next step, we analyzed relationship between PWV, CAVI and Hcy in patients  
14  
15 with vascular-related diseases. Our results showed that there was significant  
16  
17 correlation between Hcy and CR-PWV, CAVI after adjustment for age in the  
18  
19 vascular-related disease group ( $r=0.48$ ,  $p<0.001$ ;  $r=0.321$ ,  $p=0.007$ ; respectively),  
20  
21 without significant correlation between Hcy and CFPWV ( $r=0.21$ ,  $p=0.079$ ). After  
22  
23 adjustment for age and sex, significant correlation between Hcy and CR-PWV, CAVI  
24  
25 was found in the vascular-related disease group ( $r=0.40$ ,  $p=0.001$ ;  $r=0.298$ ,  $p=0.013$ ;  
26  
27 respectively). However, there was no significant correlation between Hcy and  
28  
29 CFPWV after age and sex adjusted ( $r=0.193$ ,  $p=0.115$ ).  
30  
31  
32  
33  
34  
35  
36  
37  
38

### 39 *3.3 Multiple linear regression analysis*

40  
41 Multiple linear regressions were used to estimate the coefficients of the linear  
42  
43 equation, involving independent variables that affected the value of CAVI. Our results  
44  
45 showed that Hcy, BMI, and age were independent influencing factors of CAVI in the  
46  
47 entire study group ( $\beta=0.421$ ,  $p=0.001$ ;  $\beta= -0.309$ ,  $p=0.006$ ;  $\beta=0.297$ ,  $p=0.012$ ;  
48  
49 respectively). And Hcy, BMI, and age were independent influencing factors of CAVI  
50  
51 in vascular-related disease group ( $\beta=0.434$ ,  $p=0.001$ ;  $\beta= -0.331$ ,  $p=0.009$ ;  $\beta=0.288$ ,  
52  
53  $p=0.022$ ; respectively).  
54  
55  
56  
57  
58  
59  
60

#### 4. Discussion

In the present study, we found that there was positive correlation between Hcy and CAVI in vascular-related diseases. CAVI and PWV were higher in patients with Hcy  $\geq 15\mu\text{mol/L}$ , and Hcy was an independent influencing factor of CAVI in vascular-related diseases.

An increase in arterial stiffness is not only a pathological status of hypertension, diabetes and coronary artery disease but also a strong predictor for the cardiovascular morbidity and mortality caused by these diseases. With the increasing of arterial stiffness, the incidence of hypertension, coronary heart disease increases. And arterial stiffness can be measured by pulse wave velocity (PWV) suggested by European Society of Hypertension/European Society of Cardiology guidelines. A lot of studies have showed the effect of PWV in the evaluation of arterial stiffness of vascular diseases. Aortic PWV was increasing in patients with diabetes mellitus or end-stage renal disease, indicating a higher arterial stiffness compared with health persons [13]. A research of 710 hypertension patients revealed that aortic PWV is a useful marker and predictor of cardiovascular risk in these subjects [14]. Recently, in a prospective study of general Danish population, the investigator found that aortic PWV was a useful predictor for cardiovascular outcomes above and beyond traditional cardiovascular risk factors such as 24-hour mean blood pressure [15]. Recent study showed that CRPWV was a discriminator of intrinsic wall alterations during evaluation of endothelial function by flow-mediated dilatation and CRPWV may predict the severity of the CAD [25,26]. Our present study showed that CFPWV and

1  
2  
3  
4 CRPWV were higher in patients with vascular-related diseases than in subjects  
5  
6 without vascular-related diseases ( $12.80 \pm 2.9$  vs  $9.17 \pm 2.6$ ,  $p < 0.001$ ;  $10.00 \pm 2.2$  vs  
7  
8  $9.35 \pm 0.9$ ,  $p = 0.08$ ). However, PWV itself is essentially dependent on blood pressure,  
9  
10 especially immediate blood pressure. Cardio-ankle vascular index (CAVI), a new  
11  
12 index of arterial stiffness, is derived from stiffness parameter  $\beta$ , which is detected by  
13  
14 carotid ultrasonic measurement [16].  
15  
16

17  
18  
19 CAVI is a new evaluation index of arterial stiffness independent of immediate  
20  
21 blood pressure. Recent studies have showed the role of CAVI in the prediction of  
22  
23 vascular events in vascular-related diseases such as metabolic syndrome (MS),  
24  
25 diabetes, CAD, and so on. In MS patients, there was significant positive correlation  
26  
27 between CAVI and waist circumference, and CAVI increased significantly with the  
28  
29 number of metabolic syndrome components [17]. In another MS study, they found  
30  
31 that CAVI was significantly decreased after 3-month period weight-reduction therapy  
32  
33 through diet and exercise, so the determination of arterial stiffness by CAVI may be  
34  
35 useful for evaluating and managing the cardiovascular diseases risks of MS patients  
36  
37 [18]. In a comparative study, researchers showed that the diagnostic accuracy of CAD  
38  
39 was significantly higher in the CAVI than in the brachial ankle PWV, which suggested  
40  
41 that CAVI had increased performance over brachial ankle PWV in predicting the  
42  
43 coronary artery disease [16, 17]. Namekata showed that the CAVI method was a  
44  
45 useful tool to screen persons with moderate to advanced levels of arteriosclerosis.  
46  
47 CAD is one of fatal and disabling diseases, some researchers found that CAVI was  
48  
49 significantly correlated with percentage plaque area in coronary arterial disease [21].  
50  
51  
52  
53  
54  
55  
56  
57  
58  
59  
60

1  
2  
3  
4 A lot of studies have showed that CAVI was a reliable evaluation index of  
5  
6 vascular-related diseases. Our present study showed that with the increasing numbers  
7  
8 of vascular-related diseases suffering, the level of CAVI was increasing (Table 1).  
9  
10 CAVI was significantly higher in patients with vascular-related diseases than in  
11  
12 control subjects ( $8.73 \pm 2.3$  vs  $7.51 \pm 0.9$ ,  $p=0.002$ ). And we also found significant  
13  
14 correlation between PWV and CAVI in the entire group (CAVI & CF-PWV:  $r=0.382$ ,  
15  
16  $p<0.001$ ; CAVI & CR-PWV:  $r=0.225$ ,  $p=0.039$ , respectively).  
17  
18  
19  
20

21 Homocysteine (Hcy) is an independent risk factor of cardiovascular diseases.  
22  
23 Hyperhomocysteinemia (HHcy) has been found in more than one half of patients with  
24  
25 hypertension. The possible mechanism of this process includes endothelial cell  
26  
27 damage, vascular endothelial dysfunction and enhanced oxidative stress [9,10]. Our  
28  
29 previous study showed that chronic hyperhomocysteinemia contributed to coronary  
30  
31 artery disease by inhibiting dysfunction of the coronary artery endothelium [11]. So  
32  
33 Hcy might damage the endothelium through complex mechanisms resulting  
34  
35 endothelial dysfunction. Also Hcy could promote the proliferation of smooth muscle  
36  
37 cells through inflammation and so on. Endothelial dysfunction and proliferation of  
38  
39 smooth muscle cells of arterial medium could lead to the increasing of arterial  
40  
41 stiffness. Previous study had showed positive correlation between Hcy and CAVI in  
42  
43 general population [12]. However, there was little research about the relationship  
44  
45 between Hcy and CAVI in patients with one more kinds of vascular-related diseases.  
46  
47 In the present study, we found that CAVI was positively correlated with Hcy even  
48  
49 after adjustment of other parameters, such as age and sex. The similar result was also  
50  
51  
52  
53  
54  
55  
56  
57  
58  
59  
60



1  
2  
3  
4 found between PWV and Hcy. Hcy increases not only in hypertension patients but  
5  
6 also in other vascular diseases. Hcy participates in the pathophysiological process of  
7  
8 these diseases. Hyperhomocysteinemia was defined as the level of Hcy  $\geq 15\mu\text{mol/L}$ .  
9  
10 Next, we compared the arterial stiffness between HHcy group and patients with Hcy  
11  
12  $< 15\mu\text{mol/L}$ . As shown in Table 2, the levels of PWV and CAVI were significantly  
13  
14 higher in group with Hcy  $\geq 15\mu\text{mol/L}$  than in group with Hcy  $< 15\mu\text{mol/L}$ . Finally,  
15  
16 our research showed that Hcy was an independent influencing factor of CAVI in  
17  
18 vascular-related diseases. Folate administration has been consistently shown to reduce  
19  
20 plasma Hcy even in healthy individuals without elevated Hcy levels [22]. Lange et al  
21  
22 found that folic acid treatment could reduce frequency of restenosis after angioplasty  
23  
24 in patients with markedly elevated homocysteine levels [23]. Another study showed  
25  
26 that low-dose folic acid treatment improves vascular function in CAD patients [24].  
27  
28 Our study suggested that CAVI was higher in HHcy patients, so treatment should be  
29  
30 made to lower homocysteine in HHcy patients in order to reduce arterial stiffness.  
31  
32 And thorough clinical research should be investigated in future.  
33  
34  
35  
36  
37  
38  
39  
40

41  
42 However, there were some limitations in the study: the small sample size, cases,  
43  
44 and controls were not perfectly matched. Also some patients with hypertension and  
45  
46 (or) CAD had oral medication such as amlodipine before coming to the hospital, this  
47  
48 might affect our results to a certain extent. So thorough research should be  
49  
50 investigated in future. However, our study suggested that CAVI was a useful  
51  
52 evaluation index for arterial stiffness, and there was positively correlation between  
53  
54 CAVI and Hcy.  
55  
56  
57  
58  
59  
60

1  
2  
3  
4 In conclusion, our study showed that CAVI and Hcy are closely associated  
5  
6 among vascular-related diseases. More studies should be made to investigate the role  
7  
8 of Hcy in the development of arterial stiffness.  
9  
10  
11  
12  
13  
14  
15  
16  
17  
18  
19  
20  
21  
22  
23  
24  
25  
26  
27  
28  
29  
30  
31  
32  
33  
34  
35  
36  
37  
38  
39  
40  
41  
42  
43  
44  
45  
46  
47  
48  
49  
50  
51  
52  
53  
54  
55  
56  
57  
58  
59  
60

For peer review only

### Acknowledgments

This work was supported by grants from The Capital Health Research and Development of Special to HY Wang (No. 2011-4026-02), and the hospital fund of Peking University Shougang Hospital to Hongyu Wang (No. 2010-Y002) and Jinbo Liu (No. 2012Y04).

### Disclosures

No conflicts of interest, financial or otherwise, are declared by the authors.

**Ethics approval:** From the ethics committee of the Health Science Center, Peking University, China.

## References

- [1] Cavalcante JL, Lima JAC, Redheuil A, Al-Mallah MH. Aortic stiffness. *J Am Coll Cardiol* 2011; 57:1511-22.
- [2] Mancia G, De Backer G, Dominiczak A, et al. 2007 guidelines for the management of arterial hypertension: the Task Force for the Management of Arterial Hypertension of the European Society of Hypertension (ESH) and of the European Society of Cardiology (ESC). *J Hypertens* 2007;25:1105– 87.
- [3] Ni Y, Wang H, Hu D, Zhang W. The Relationship between Pulse Wave Velocity and Pulse Pressure in Chinese Patients with Essential Hypertension. *Hypertens Res* 2003;26:871-874.
- [4] Wang H, Zhang W, Gong L, Hu D, et al. Study of Relationship between Large Artery Distensibility and Left Ventricular Hypertrophy in Patients with Essential Hypertension. *Chin J Cardiol*, 2000;28:177-180.
- [5] Shirai K, Utino J, Otsuka K, Takata M. A novel blood pressure-independent arterial wall stiffness parameter: cardio-ankle vascular index (CAVI). *J Atheroscler Thromb* 2006, 13:101-107.
- [6] Kim KJ, Lee BW, Kim HM, Shin JY, Kang ES, Cha BS, et al. Associations between cardio-ankle vascular index and microvascular complications in type 2 diabetes mellitus patients. *J Atheroscler Thromb* 2011;27;18(4):328-36.
- [7] Takaki A, Ogawa H, Wakeyama T, Iwami T, Kimura M, Hadano Y, et al. Cardio-ankle vascular index is a new noninvasive parameter of arterial stiffness. *Circ J* 2007;71(11):1710-4.

- 1  
2  
3  
4 [8] Antoniadou C, Antonopoulos AS, Tousoulis D, Marinou K, Stefanadis C.  
5  
6 Homocysteine and coronary atherosclerosis: from folate fortification to the recent  
7  
8 clinical trials. *European Heart Journal* (2009) 30, 6–15  
9  
10  
11 [9] Topal G, Brunet A, Millanvoye E, Boucher JL, Rendu F, Devynck MA, et al.  
12  
13 Homocysteine induces oxidative stress by uncoupling of NO synthase activity  
14  
15 through reduction of tetrahydrobiopterin. *Free Radic Biol Med*, 2004; 36: 1532-41.  
16  
17  
18 [10] Meze C, Schumann J, Wagner A, and Gross P. Effects of homocysteine on the  
19  
20 levels of caveolin-1 and eNOS in caveolae of human coronary artery endothelial  
21  
22 cells. *Atherosclerosis*, 2007; 190: 256-63.  
23  
24  
25  
26 [11] He L, Zeng H, Li F, Feng J, Liu S, Liu J, et al. Homocysteine impairs coronary  
27  
28 artery endothelial function by inhibiting tetrahydrobiopterin in patients with  
29  
30 hyperhomocysteinemia. *Am J Physiol Endocrinol Metab* 2010; 299: E1061–E1065.  
31  
32  
33  
34 [12] Kadota K, Takamura N, Aoyagi K, Yamasaki H, Usa T, Nakazato M, et al.  
35  
36 Availability of cardio-ankle vascular index (CAVI) as a screening tool for  
37  
38 atherosclerosis. *Cir J* 2008; 72: 304-308.  
39  
40  
41 [13] Aoun S, Blacher J, Safar ME, Mourad JJ. Diabetes mellitus and renal  
42  
43 failure: effects on large artery stiffness. *Journal of Human Hypertension* 2001;  
44  
45 15:693-700.  
46  
47  
48  
49 [14] Blacher J, Asmar R, Djane S, London GM, Safar ME. Aortic pulse wave velocity  
50  
51 as a marker of cardiovascular risk in hypertensive patients. *Hypertension* 1999; 33:  
52  
53 1111-1117.  
54  
55  
56 [15] Hansen TW, Staessen JA, Torp-Pedersen C, Rasmussen S, Thijs L, Ibsen H, et al.  
57  
58  
59  
60

- 1  
2  
3  
4 Prognostic value of aortic pulse wave velocity as index of arterial stiffness in the  
5  
6 general population. *Circulation*. 2006;113:664-670.  
7
- 8  
9 [16] Takaki A, Ogawa H, Wakeyama T, Iwami T, Kimura M, Hadano Y, et al.  
10  
11 Cardio-Ankle Vascular Index is a New Noninvasive Parameter of Arterial  
12  
13 Stiffness. *Circ J* 2007;71:1710–1714.  
14
- 15  
16 [17]Liu H, Zhang X, Feng X, Li J, Hu M, Yambe T. Effects of metabolic syndrome  
17  
18 on cardio-ankle vascular index in middle-aged and elderly Chinese. *Metab Syndr*  
19  
20 *Relat Disord* 2011 Apr;9(2):105-10. Epub 2010 Nov 22.  
21  
22
- 23  
24 [18] Satoh N, Shimatsu A, Kato Y, Araki R, Koyama K, Okajima T, et al. Evaluation  
25  
26 of the cardio-ankle vascular index, a new indicator of arterial stiffness independent  
27  
28 of blood pressure, in obesity and metabolic syndrome. *Hypertens Res*  
29  
30 2008;31(10):1921-30.  
31  
32
- 33  
34 [19]Horinaka S, Yabe A, Yagi H, Ishimura K, Hara H, Iemua T, Matsuoka H.  
35  
36 Comparison of atherosclerotic indicators between cardio ankle vascular index and  
37  
38 brachial ankle pulse wave velocity. *Angiology* 2009 Aug-Sep;60(4):468-76. Epub  
39  
40 2008 Nov 17.  
41  
42
- 43  
44 [20]Takaki A, Ogawa H, Wakeyama T, Iwami T, Kimura M, Hasano Y, et al.  
45  
46 Cardio-ankle vascular index is superior to brachial-ankle pulse wave velocity as an  
47  
48 index of arterial stiffness. *Hypertens Res* 2008 Jul;31(7):1347-55.  
49  
50
- 51  
52 [21]Horinaka S, Yabe A, Yagi H, Ishimura K, Hara H, Iemura T, et al. Cardio-ankle  
53  
54 vascular index could reflect plaque burden in the coronary artery. *Angiology* 2011  
55  
56 Jul;62(5):401-8. Epub 2011 Mar 18.  
57  
58  
59  
60

- 1  
2  
3  
4 [22] Ward M, McNulty H, McPartlin J, Strain JJ, Weir DG, Scott JM. Plasma  
5  
6 homocysteine, a risk factor for cardiovascular disease, is lowered by physiological  
7  
8 doses of folic acid. *QJM* 1997;90:519–524.  
9  
10  
11 [23] Lange H, Suryapranata H, De Luca G, Borner C, Dille J, Kallmayer K, et al.  
12  
13 Folate therapy and in-stent restenosis after coronary stenting. *N Engl J Med*  
14  
15 2004;350:2673–2681.  
16  
17  
18 [24] Shirodaria C, Antoniadou C, Lee J, Jackson CE, Robson MD, Francis JM, et al.  
19  
20 Global improvement of vascular function and redox state with low-dose folic acid:  
21  
22 implications for folate therapy in patients with coronary artery disease.  
23  
24 *Circulation*. 2007; May 1;115(17):2262-70.  
25  
26  
27  
28 [25] Torrado J, Bia D, Zócalo Y, Farro I, Farro F, Valero M, et al. Carotid-radial pulse  
29  
30 wave velocity as a discriminator of intrinsic wall alterations during evaluation of  
31  
32 endothelial function by flow-mediated dilatation. *Conf Proc IEEE Eng Med Biol*  
33  
34 *Soc*. 2011;2011:6458-61.  
35  
36  
37  
38 [26] Lee YS, Kim KS, Nam CW, Han SW, Hur SH, Kim YN, et al. Clinical  
39  
40 implication of carotid-radial pulse wave velocity for patients with coronary artery  
41  
42 disease. *Korean Circulation J* 2006;36:565-572.  
43  
44  
45  
46  
47  
48  
49  
50  
51  
52  
53  
54  
55  
56  
57  
58  
59  
60

**Figure legends**

Figure 1 Relationship between CF-PWV and Hcy (Fig 1A) , CR-PWV and Hcy (Fig 1B) in the entire study group. Hcy: homocysteine. CF-PWV: carotid-femoral pulse wave velocity. CR-PWV: carotid-radial pulse wave velocity.

Figure 2 Relationship between CAVI and Hcy in the entire study group. Hcy: homocysteine. CAVI: cardio-ankle vascular index.



Table 1 Clinical characteristics in different groups according to the numbers of vascular-related diseases.

| Characteristics        | Group 0<br>N=12 | Group 1<br>N=33 | Group 2<br>N=34 | Group 3<br>N=9 | <i>p</i> values |
|------------------------|-----------------|-----------------|-----------------|----------------|-----------------|
| Age, y                 | 54.4±9.5        | 63.5±13.1       | 73.2±10.0       | 76.1±10.3      | <0.01           |
| Sex(Male/Female)       | 4/8             | 20/13           | 16/18           | 6/3            | 0.283           |
| BMI, kg/m <sup>2</sup> | 22.4±3.3        | 23.9±3.9        | 23.3±4.4        | 25.7±2.6       | 0.32            |
| LDL, mmol/L            | 1.82±0.4        | 1.83±0.6        | 1.71±0.4        | 1.84±0.2       | 0.759           |
| HDL, mmol/L            | 1.90±2.9        | 0.95±0.2        | 1.01±0.3        | 1.00±0.25      | 0.078           |
| Hs-CRP, mg/L           | 4.73±10.8       | 8.14±15.3       | 10.79±15.3      | 17.2±35.8      | 0.496           |
| HbA1c %                | 5.78±0.3        | 5.92±0.5        | 5.86±0.3        | 5.98±1.7       | 0.917           |
| Hcy (umol/L)           | 11.0±2.8        | 19.0±9.1        | 16.7±6.4        | 21.1±8.5       | 0.006           |
| Urinary Microalbumin   | 3.66±4.4        | 16.69±39.0      | 7.50±10.9       | 13.90±22.4     | 0.522           |
| Heart rate             | 75.5±9.6        | 72.4±13.3       | 74.7±13.4       | 69.4±8.5       | 0.621           |
| ABI                    | 1.10±0.13       | 1.10±0.09       | 1.06±0.14       | 1.02±0.21      | 0.284           |
| SBP, mmHg              | 126.0±13.8      | 138.6±19.8      | 145.3±23.1      | 154.3±23.4     | 0.012           |
| DBP, mmHg              | 79.5±7.2        | 81.7±9.5        | 82.7±9.7        | 86.1±9.9       | 0.479           |
| CF-PWV                 | 9.17±2.6        | 12.33±3.0       | 13.03±2.8       | 13.85±1.86     | <0.001          |
| CR-PWV                 | 9.34±0.92       | 10.12±1.98      | 9.8±2.21        | 10.29±2.96     | 0.648           |
| CAVI                   | 7.51±0.9        | 8.23±2.4        | 9.09±2.3        | 9.34±2.0       | 0.08            |

CAD: coronary artery disease. ASO: arteriosclerosis obliterans. Group 0: without diseases of hypertension, CAD, ASO; group 1: with one of diseases of hypertension, CAD, ASO; group 2: with two of diseases of hypertension, CAD, ASO; group 3: with all diseases of hypertension, CAD, ASO; BMI: body mass index. LDL: low-density lipoprotein. HDL: high-density lipoprotein. CRP: C-reactive protein. Hcy: homocysteine. ABI: ankle-brachial index. SBP: systolic blood pressure; DBP: diastolic blood pressure. CF-PWV: carotid-femoral pulse wave velocity. CR-PWV: carotid-radial pulse wave velocity. CAVI: cardio-ankle vascular index. The differences between groups were analyzed by one-way ANOVA. Proportions were analyzed by  $\chi^2$ -test.

Table 2 Clinical characteristics in patients with Hcy&lt;15umol/ and Hcy≥15umol/.

| Characteristics        | Hcy<15umol/L<br>(n=43) | Hcy≥15umol/L<br>(n=45) | <i>p</i> values |
|------------------------|------------------------|------------------------|-----------------|
| Age, y                 | 61.9±13.0              | 71.9±11.5              | <0.01           |
| Sex(Male/Female)       | 14/29                  | 32/13                  | <0.001          |
| BMI, kg/m <sup>2</sup> | 23.9±4.2               | 23.3±3.8               | 0.48            |
| Hypertension, No(%)    | 26(60.5)               | 31(68.9)               | 0.41            |
| CAD, No(%)             | 18(41.2)               | 25(55.6)               | 0.2             |
| ASO, No(%)             | 8(18.6)                | 17(37.8)               | 0.03            |
| LDL, mmol/L            | 1.72±0.4               | 1.84±0.6               | 0.31            |
| HDL, mmol/L            | 1.19±1.5               | 1.04±0.3               | 0.53            |
| Hs-CRP, mg/L           | 7.70±0.17              | 11.34±19.5             | 0.36            |
| HbA1c %                | 5.80±0.3               | 5.96±0.8               | 0.34            |
| Hcy umol/L             | 11.89±2.0              | 22.19±8.0              | <0.001          |
| Urinary Microalbumin   | 4.35±4.3               | 17.58±35.0             | 0.057           |
| Heartrate              | 72.0±9.7               | 74.9±14.5              | 0.28            |
| ABI                    | 1.09±0.12              | 1.06±0.13              | 0.23            |
| SBP, mmHg              | 134.1±18.2             | 147.0±23.2             | 0.005           |
| DBP, mmHg              | 81.2±8.4               | 83.1±10.0              | 0.36            |
| CF-PWV                 | 10.8±2.5               | 13.7±3.0               | <0.001          |
| CR-PWV                 | 9.2±1.6                | 10.6±2.1               | 0.001           |
| CAVI                   | 7.79±2.1               | 9.30±2.1               | 0.001           |

Results were shown as mean ±SD unless stand otherwise. CAD: coronary artery disease. ASO: arteriosclerosis obliterans. BMI: body mass index. LDL: low-density lipoprotein. HDL: high-density lipoprotein. CRP: C-reactive protein. Hcy: homocysteine. ABI: ankle-brachial index. SBP: systolic blood pressure; DBP: diastolic blood pressure. CF-PWV: carotid-femoral pulse wave velocity. CR-PWV: carotid-radial pulse wave velocity. CAVI: cardio-ankle vascular index. The difference between groups were analyzed by Student' *t*-test. Proportions were analyzed by  $\chi^2$ -test.

1  
2  
3  
4 Descriptive study of possible link between cardio-ankle vascular index  
5  
6 and homocysteine in vascular-related diseases  
7  
8

9 Hongyu Wang<sup>\*,1,#</sup>, Jinbo Liu<sup>\*,1</sup>, Qi Wang<sup>1</sup>, Hongwei Zhao<sup>1</sup>, Hongyan Shi<sup>1</sup>,  
10  
11 Xiaolan Yu<sup>1</sup>, Xiaobao Fu<sup>1</sup>  
12

13  
14  
15 <sup>1</sup> Department of Vascular Medicine; Peking University Shougang Hospital, Beijing  
16  
17 100144, P. R. of China.  
18

19  
20  
21 \* Equal contributors  
22

23  
24 #Corresponding Author: Hongyu Wang, Vascular Medicine; Peking University  
25  
26 Shougang Hospital; Beijing 100144, P. R. of China.  
27

28  
29  
30 Tel (Fax): +8610-57830226; +8610-57830226  
31

32  
33 Email: [hongyuwang@188.com](mailto:hongyuwang@188.com)  
34

35  
36  
37 *Running title:* CAVI and Homocysteine  
38  
39  
40  
41  
42  
43  
44  
45  
46  
47  
48  
49  
50  
51  
52  
53  
54  
55  
56  
57  
58  
59  
60

## Abstract

**Objectives:** Cardio-ankle vascular index (CAVI) is a new index of arterial stiffness independent of immediate blood pressure. Homocysteine (Hcy) is an independent risk factor for vascular diseases. The aim of this study was to investigate the relationship between Hcy and CAVI in vascular-related diseases.

**Design:** Descriptive Research.

**Participants:** 88 patients (M/F 46/42) with or without hypertension, coronary artery disease or arteriosclerosis obliterans were enrolled into our study. They were divided into two groups according to the level of Hcy.

**Methods:** CAVI, carotid-femoral pulse wave velocity (CFPWV) and carotid-radial pulse wave velocity (CRPWV) were measured by VS-1000 and Complior apparatus.

**Results:** There was significant correlation between Hcy and CF-PWV, CR-PWV, CAVI in the entire group ( $r=0.33$ ,  $p=0.002$ ;  $r=0.51$ ,  $p<0.001$ ;  $r=0.42$ ,  $p<0.001$ ; respectively). And there was significant correlation between Hcy and CF-PWV, CR-PWV, CAVI in the vascular-related disease group ( $r=0.23$ ,  $p=0.048$ ;  $r=0.51$ ,  $p<0.001$ ;  $r=0.392$ ,  $p=0.001$ ; respectively). The level of Hcy was significantly higher in patients with one or more vascular diseases than in patients without vascular diseases. The levels of CF-PWV, CR-PWV, and CAVI were significantly higher in Hcy  $\geq 15\mu\text{mol/L}$  group than in Hcy  $<15\mu\text{mol/L}$  group ( $13.7\pm 3.0$  vs  $10.8\pm 2.5$ ,  $p<0.001$ ;  $10.6\pm 2.1$  vs  $9.2\pm 1.6$ ,  $p=0.001$ ;  $9.30\pm 2.1$  vs  $7.79\pm 2.1$ ,  $p=0.001$ ; respectively). Multiple linear regression showed that Hcy, body mass index (BMI), and age were independent associating factors of CAVI in the entire study group ( $\beta=0.421$ ,  $p=0.001$ ;

1  
2  
3  
4  $\beta = -0.309, p=0.006; \beta=0.297, p=0.012;$  respectively). And Hcy, BMI, and age were  
5  
6 independent influencing factors of CAVI in vascular-related disease group ( $\beta=0.434,$   
7  
8  $p=0.001; \beta = -0.331, p=0.009; \beta=0.288, p=0.022;$  respectively).

9  
10  
11 **Conclusions:** CAVI was positively correlated with homocysteine in vascular-related  
12  
13 diseases.

14  
15  
16 **Keywords:** Cardio-ankle vascular index; Homocysteine; Vascular-related diseases  
17  
18  
19  
20  
21  
22  
23  
24  
25  
26  
27  
28  
29  
30  
31  
32  
33  
34  
35  
36  
37  
38  
39  
40  
41  
42  
43  
44  
45  
46  
47  
48  
49  
50  
51  
52  
53  
54  
55  
56  
57  
58  
59  
60

1  
2  
3 Article summary  
4

5 1. Article focus  
6

7 To investigate the relationship between homocysteine (Hcy) and Cardio-ankle  
8 vascular index (CAVI) in vascular-related diseases.  
9

10  
11 2. Key messages

12 Homocysteine was positively correlated with CAVI in vascular-related diseases.

13 3. Strengths and limitations of this study

14  
15 Strengths of this study: our present study firstly showed the relationship between  
16 Hcy and CAVI in vascular-related diseases.  
17  
18

19 Limitations of this study: the small **sample** size, cases, and controls were not  
20 perfectly matched.  
21  
22  
23  
24  
25  
26  
27  
28  
29  
30  
31  
32  
33  
34  
35  
36  
37  
38  
39  
40  
41  
42  
43  
44  
45  
46  
47  
48  
49  
50  
51  
52  
53  
54  
55  
56  
57  
58  
59  
60

## 1. Introduction

Arterial stiffness is a strong predictor of future cardiovascular events and all-cause mortality. And it is one of the earliest detectable manifestations of adverse structural and functional changes within the vessel wall [1]. Arterial stiffness can be measured by pulse wave velocity (PWV), which is considered as the gold standard method suggested by European Society of Hypertension/European Society of Cardiology guidelines [2]. And our previous studies also showed that PWV was positively correlated with pulse pressure and it was increased in hypertension patients with left ventricular hypertrophy [3, 4]. However, PWV itself is essentially dependent on blood pressure especially immediate blood pressure. Cardio-ankle vascular index (CAVI), a new index of arterial stiffness independent of blood pressure, is recently developed by measuring of PWV and blood pressure [5]. Recent studies have showed that CAVI was a reliable index of arterial stiffness in many vascular-related diseases [6,7].

Homocysteine has been considered as an independent risk factor for atherosclerosis [8]. The possible mechanism of this process includes endothelial cell damage, vascular endothelial dysfunction and enhanced oxidative stress. Recent studies showed that homocysteine caused endothelial dysfunction through inhibiting the reactions between endothelial nitric oxide synthase (eNOS) and tetrahydrobiopterin (BH4) [9,10]. Our previous study showed that chronic hyperhomocysteinemia contributed to coronary artery disease by inhibiting dysfunction of the coronary artery endothelium [11]. Increased arterial stiffness

1  
2  
3  
4 resulted from many factors such as endothelial dysfunction, smooth muscle cells  
5  
6 proliferation, thickening of vascular wall. Kadota et al had showed positive  
7  
8 correlation between Hcy and CAVI in general population [12]. However, the  
9  
10 relationship between CAVI and Hcy in vascular-related diseases such as hypertension,  
11  
12 coronary artery disease (CAD), and arteriosclerosis obliterans (ASO) was still  
13  
14 unknown, especially in patients with one more kinds of vascular-related diseases. In  
15  
16 the present study, we investigated the possible link between CAVI and homocysteine  
17  
18 in vascular-related diseases such as hypertension, CAD and ASO.  
19  
20  
21  
22  
23  
24  
25

## 26 **2. Materials and methods**

### 27 *2.1 Subjects*

28  
29  
30  
31 88 patients (M/F: 46/42) with or without hypertension, CAD or ASO from  
32  
33 vascular medicine department of Peking University Shougang Hospital from February  
34  
35 2012 to April 2012 were enrolled into our study. There were 57 patients with  
36  
37 hypertension, 43 with CAD, and 25 patients with ASO in the whole study group. And  
38  
39 there were 12 patients without hypertension, CAD and ASO but suffering one of these  
40  
41 two diseases, acute upper respiratory tract infection or acute gastritis.  
42  
43  
44  
45

46  
47 Hypertension was defined as known cases of hypertension or blood pressure  
48  
49 measurement  $\geq 140/90$ mmHg in three occasions at rest. CAD or ASO was defined as  
50  
51 the narrowing or blockage of coronary artery or lower extremity artery diagnosed by  
52  
53 angiography. Hyperhomocysteinemia was defined as the level of plasma Hcy  $\geq$   
54  
55 15umol/L[11].  
56  
57  
58  
59  
60



1  
2  
3  
4           Enrolled patients were divided into four groups according to numbers of  
5  
6 suffering vascular-related diseases. Also they were divided into two groups according  
7  
8 to level of Hcy (Hcy <15umol/L group, N=43, and Hcy  $\geq$ 15umol/L group, N=45).  
9  
10 All participants gave their written informed consent. This study was approved by the  
11  
12 ethics committee of the Health Science Center, Peking University.  
13  
14

### 15 16 17 18 19 *2.2 Pulse wave velocity measurement*

20  
21           Arterial stiffness was evaluated by measuring automatic PWV using the  
22  
23 Complior apparatus. The basic principle of PWV assessment is that pressure pulse  
24  
25 generated by ventricular ejection is propagated along the arterial system at a speed  
26  
27 determined by elasticity of the arterial wall. Knowing the distance and pulse transit  
28  
29 time, the velocity can be calculated. Patients were placed in recumbent position and,  
30  
31 after a 10-minute rest, underwent PWV measurement and carotid-femoral PWV  
32  
33 (CFPWV) and carotid-radial PWV (CRPWV) was obtained automatically. CFPWV  
34  
35 and CRPWV are both reliable index for arterial stiffness of vascular diseases  
36  
37 [2,26]. And we chose the right PWV for analysis.  
38  
39  
40  
41  
42  
43  
44  
45

### 46 47 *2.3 The assessment of CAVI*

48  
49           CAVI was recorded using a VaseraVS-1000 vascular screening system (Fukuda  
50  
51 Denshi, Tokyo, Japan) with the participant resting in a supine position. ECG  
52  
53 electrodes were placed on both wrists, a microphone for detecting heart sounds was  
54  
55 placed on the sternum, and cuffs were wrapped around both the arms and ankles.  
56  
57  
58  
59  
60

1  
2  
3  
4 After automatic measurements, obtained data were analyzed by software, and the  
5  
6 value of CAVI was obtained automatically [16]. And we chose the right CAVI for  
7  
8 analysis.  
9

#### 10 11 12 13 14 *2.4 Laboratory measurements*

15  
16 Blood samples were drawn from an antecubital vein in the morning after  
17  
18 overnight fasting and collected into vacuum tubes containing EDTA for the  
19  
20 measurement of plasma lipid and lipoprotein levels. Total cholesterol, high-density  
21  
22 lipoprotein (HDL) cholesterol, and triglyceride levels were analyzed by colorimetric  
23  
24 enzymatic assays with the use of an autoanalyzer (HITACHI-7170, Hitachi, Tokyo,  
25  
26 Japan). Low-density lipoprotein cholesterol (LDL-C) levels were calculated. Fasting  
27  
28 plasma glucose, homocysteine, hs-C reactive protein were also determined by  
29  
30 colorimetric methods of related metabolic products using the same autoanalyzer at the  
31  
32 central chemistry laboratory of the Peking University Shougang Hospital.  
33  
34  
35  
36  
37  
38  
39  
40  
41  
42

#### 43 44 45 46 47 48 49 50 51 52 53 54 55 56 57 58 59 60 *2.5 Statistical analysis*

SPSS 13.0 was used as statistical software in the present study. The differences  
between groups were analyzed by Student' *t*-test and one-way ANOVA. Proportions  
were analyzed by  $\chi^2$ -test. Correlation coefficient was done to find linear relation  
between different variables using Spearman correlation coefficient. Multiple linear  
regressions were used to estimate the coefficients of the linear equation, involving  
independent variables that affected the value of the dependent variables. Values were

1  
2  
3  
4 shown as mean  $\pm$  SD unless stand otherwise.  $p < 0.05$  (2-tailed) was considered  
5  
6 statistically significant.  
7  
8  
9

### 10 11 **3. Results**

#### 12 13 *3.1 Clinical characteristics of the study participants*

14  
15 The clinical characteristics of study participants are shown in Table 1. Among  
16  
17 these subjects, 33 patients had only one of these three vascular-related diseases, 34  
18  
19 patients had two of these three vascular-related diseases, 9 patients had all of these  
20  
21 three diseases, and 12 subjects with none of vascular-related diseases. Our results  
22  
23 showed that with the increasing numbers of suffered vascular-related diseases, the  
24  
25 level of Hcy was increasing. Similar results were also found in the parameters of  
26  
27 CF-PWV and CAVI. However, we found there was significant difference about age  
28  
29 between these four groups.  
30  
31  
32  
33  
34  
35

36  
37 Next, we divided subjects into two groups according to the level of Hcy. As  
38  
39 shown in Table 2, the level of CAVI was significant higher in patients with Hcy  $\geq$   
40  
41 15umol/L than in group with Hcy < 15umol/L. The similar result was also found in  
42  
43 another evaluation index of arterial stiffness-PWV. However, there was significant  
44  
45 difference about age and sex between these two groups.  
46  
47  
48  
49  
50

#### 51 52 *3.2 Pearson correlations between PWV, CAVI and Hcy in the entire study group*

53  
54 PWV is a golden evaluation of arterial stiffness of vascular diseases. There are  
55  
56 some kinds of PWV according to different arteries, such as carotid-femoral pulse  
57  
58  
59  
60

1  
2  
3  
4 wave velocity (CF-PWV), and carotid-radial pulse wave velocity (CR-PWV). CFPWV  
5  
6 and CRPWV are both reliable index for arterial stiffness of vascular diseases [2,26].  
7  
8  
9 As shown in Fig 1. CF-PWV was positively correlated with Hcy in entire group  
10  
11 (r=0.33, p=0.002, Fig 1A). There was also significant positive correlation between  
12  
13 CR-PWV and Hcy in all patients (r=0.51, p<0.001, Fig 1B). In addition, our results  
14  
15 showed that there was significant correlation between Hcy and CF-PWV, CR-PWV in  
16  
17 the vascular-related disease group (r=0.23, p=0.048; r=0.51, p<0.001, respectively).  
18  
19

20  
21 CAVI, a new index of arterial stiffness independent of blood pressure, is recently  
22  
23 developed by measuring of PWV and blood pressure. And CAVI was not affected by  
24  
25 immediate blood pressure. As shown in Fig2, there was significant positive correlation  
26  
27 between CAVI and Hcy in all patients (r=0.42, p<0.0001). Also we found there was  
28  
29 significant correlation between Hcy and CAVI in the vascular-related disease group  
30  
31 (r=0.392, p=0.001). However, there was no significant correlation between Hcy and  
32  
33 CF-PWV, CR-PWV, CAVI in patients without vascular-related diseases in the present  
34  
35 study (r=0.14, p=0.661; r=0.152, p=0.620; r=0.056, p=0.855; respectively).  
36  
37  
38  
39

40  
41 As shown in Table 1 and Table 2, there was significant difference about age or  
42  
43 sex between groups. So next, we investigated the possible relationship between CAVI,  
44  
45 PWV and Hcy after adjusting the variable of age or sex. Our results showed that there  
46  
47 was still significant correlation between CAVI and Hcy after adjustment for age in the  
48  
49 entire study group (r=0.293, p=0.008). Also a positive correlation between PWV and  
50  
51 Hcy was found after age adjusted in the entire study group (CFPWV vs Hcy, r=0.282,  
52  
53 p=0.010; CRPWV vs Hcy, r=0.462, p<0.001; respectively). In addition, there was  
54  
55  
56  
57  
58  
59  
60

1  
2  
3  
4 significant correlation between Hcy and CF-PWV, CR-PWV, CAVI after age and sex  
5  
6 adjusted in the entire study group ( $r=0.26$ ,  $p=0.022$ ;  $r=0.38$ ,  $p=0.001$ ;  $r=0.27$ ,  $p=0.014$ ;  
7  
8 respectively).

9  
10  
11 There were 12 patients without vascular-related diseases in the entire study group,  
12  
13 so in next step, we analyzed relationship between PWV, CAVI and Hcy in patients  
14  
15 with vascular-related diseases. Our results showed that there was significant  
16  
17 correlation between Hcy and CR-PWV, CAVI after adjustment for age in the  
18  
19 vascular-related disease group ( $r=0.48$ ,  $p<0.001$ ;  $r=0.321$ ,  $p=0.007$ ; respectively),  
20  
21 without significant correlation between Hcy and CFPWV ( $r=0.21$ ,  $p=0.079$ ). After  
22  
23 adjustment for age and sex, significant correlation between Hcy and CR-PWV, CAVI  
24  
25 was found in the vascular-related disease group ( $r=0.40$ ,  $p=0.001$ ;  $r=0.298$ ,  $p=0.013$ ;  
26  
27 respectively). However, there was no significant correlation between Hcy and  
28  
29 CFPWV after age and sex adjusted ( $r=0.193$ ,  $p=0.115$ ).

### 30 31 32 33 34 35 36 37 38 39 3.3 Multiple linear regression analysis

40  
41 Multiple linear regressions were used to estimate the coefficients of the linear  
42  
43 equation, involving independent variables that affected the value of CAVI. Our results  
44  
45 showed that Hcy, BMI, and age were independent influencing factors of CAVI in the  
46  
47 entire study group ( $\beta=0.421$ ,  $p=0.001$ ;  $\beta= -0.309$ ,  $p=0.006$ ;  $\beta=0.297$ ,  $p=0.012$ ;  
48  
49 respectively). And Hcy, BMI, and age were independent influencing factors of CAVI  
50  
51 in vascular-related disease group ( $\beta=0.434$ ,  $p=0.001$ ;  $\beta= -0.331$ ,  $p=0.009$ ;  $\beta=0.288$ ,  
52  
53  $p=0.022$ ; respectively).

#### 4. Discussion

In the present study, we found that there was positive correlation between Hcy and CAVI in vascular-related diseases. CAVI and PWV were higher in patients with Hcy  $\geq 15\mu\text{mol/L}$ , and Hcy was an independent influencing factor of CAVI in vascular-related diseases.

An increase in arterial stiffness is not only a pathological status of hypertension, diabetes and coronary artery disease but also a strong predictor for the cardiovascular morbidity and mortality caused by these diseases. With the increasing of arterial stiffness, the incidence of hypertension, coronary heart disease increases. And arterial stiffness can be measured by pulse wave velocity (PWV) suggested by European Society of Hypertension/European Society of Cardiology guidelines. A lot of studies have showed the effect of PWV in the evaluation of arterial stiffness of vascular diseases. Aortic PWV was increasing in patients with diabetes mellitus or end-stage renal disease, indicating a higher arterial stiffness compared with health persons [13]. A research of 710 hypertension patients revealed that aortic PWV is a useful marker and predictor of cardiovascular risk in these subjects [14]. Recently, in a prospective study of general Danish population, the investigator found that aortic PWV was a useful predictor for cardiovascular outcomes above and beyond traditional cardiovascular risk factors such as 24-hour mean blood pressure [15]. Recent study showed that CRPWV was a discriminator of intrinsic wall alterations during evaluation of endothelial function by flow-mediated dilatation and CRPWV may predict the severity of the CAD [25,26]. Our present study showed that CFPWV and

1  
2  
3  
4 CRPWV were higher in patients with vascular-related diseases than in subjects  
5  
6 without vascular-related diseases ( $12.80 \pm 2.9$  vs  $9.17 \pm 2.6$ ,  $p < 0.001$ ;  $10.00 \pm 2.2$  vs  
7  
8  $9.35 \pm 0.9$ ,  $p = 0.08$ ). However, PWV itself is essentially dependent on blood pressure,  
9  
10 especially immediate blood pressure. Cardio-ankle vascular index (CAVI), a new  
11  
12 index of arterial stiffness, is derived from stiffness parameter  $\beta$ , which is detected by  
13  
14 carotid ultrasonic measurement [16].  
15  
16

17  
18  
19 CAVI is a new evaluation index of arterial stiffness independent of immediate  
20  
21 blood pressure. Recent studies have showed the role of CAVI in the prediction of  
22  
23 vascular events in vascular-related diseases such as metabolic syndrome (MS),  
24  
25 diabetes, CAD, and so on. In MS patients, there was significant positive correlation  
26  
27 between CAVI and waist circumference, and CAVI increased significantly with the  
28  
29 number of metabolic syndrome components [17]. In another MS study, they found  
30  
31 that CAVI was significantly decreased after 3-month period weight-reduction therapy  
32  
33 through diet and exercise, so the determination of arterial stiffness by CAVI may be  
34  
35 useful for evaluating and managing the cardiovascular diseases risks of MS patients  
36  
37 [18]. In a comparative study, researchers showed that the diagnostic accuracy of CAD  
38  
39 was significantly higher in the CAVI than in the brachial ankle PWV, which suggested  
40  
41 that CAVI had increased performance over brachial ankle PWV in predicting the  
42  
43 coronary artery disease [16, 17]. Namekata showed that the CAVI method was a  
44  
45 useful tool to screen persons with moderate to advanced levels of arteriosclerosis.  
46  
47 CAD is one of fatal and disabling diseases, some researchers found that CAVI was  
48  
49 significantly correlated with percentage plaque area in coronary arterial disease [21].  
50  
51  
52  
53  
54  
55  
56  
57  
58  
59  
60

1  
2  
3  
4 A lot of studies have showed that CAVI was a reliable evaluation index of  
5  
6 vascular-related diseases. Our present study showed that with the increasing numbers  
7  
8 of vascular-related diseases suffering, the level of CAVI was increasing (Table 1).  
9  
10  
11 CAVI was significantly higher in patients with vascular-related diseases than in  
12  
13 control subjects ( $8.73 \pm 2.3$  vs  $7.51 \pm 0.9$ ,  $p=0.002$ ). And we also found significant  
14  
15 correlation between PWV and CAVI in the entire group (CAVI & CF-PWV:  $r=0.382$ ,  
16  
17  $p<0.001$ ; CAVI & CR-PWV:  $r=0.225$ ,  $p=0.039$ , respectively).  
18  
19  
20

21 Homocysteine (Hcy) is an independent risk factor of cardiovascular diseases.  
22  
23 Hyperhomocysteinemia (HHcy) has been found in more than one half of patients with  
24  
25 hypertension. The possible mechanism of this process includes endothelial cell  
26  
27 damage, vascular endothelial dysfunction and enhanced oxidative stress [9,10]. Our  
28  
29 previous study showed that chronic hyperhomocysteinemia contributed to coronary  
30  
31 artery disease by inhibiting dysfunction of the coronary artery endothelium [11]. So  
32  
33 Hcy might damage the endothelium through complex mechanisms resulting  
34  
35 endothelial dysfunction. Also Hcy could promote the proliferation of smooth muscle  
36  
37 cells through inflammation and so on. Endothelial dysfunction and proliferation of  
38  
39 smooth muscle cells of arterial medium could lead to the increasing of arterial  
40  
41 stiffness. Previous study had showed positive correlation between Hcy and CAVI in  
42  
43 general population [12]. However, there was little research about the relationship  
44  
45 between Hcy and CAVI in patients with one more kinds of vascular-related diseases.  
46  
47 In the present study, we found that CAVI was positively correlated with Hcy even  
48  
49 after adjustment of other parameters, such as age and sex. The similar result was also  
50  
51  
52  
53  
54  
55  
56  
57  
58  
59  
60



1  
2  
3  
4 found between PWV and Hcy. Hcy increases not only in hypertension patients but  
5  
6 also in other vascular diseases. Hcy participates in the pathophysiological process of  
7  
8 these diseases. Hyperhomocysteinemia was defined as the level of Hcy  $\geq 15\mu\text{mol/L}$ .

9  
10  
11 **Next**, we compared the arterial stiffness between HHcy group and patients with Hcy  
12  
13  $< 15\mu\text{mol/L}$ . As shown in Table 2, the levels of PWV and CAVI were significantly  
14  
15 higher in group with Hcy  $\geq 15\mu\text{mol/L}$  than in group with Hcy  $< 15\mu\text{mol/L}$ . Finally,  
16  
17 our research showed that Hcy was an independent influencing factor of CAVI in  
18  
19 vascular-related diseases. Folate administration has been consistently shown to reduce  
20  
21 plasma Hcy even in healthy individuals without elevated Hcy levels [22]. Lange et al  
22  
23 found that folic acid treatment could reduce frequency of restenosis after angioplasty  
24  
25 in patients with markedly elevated homocysteine levels [23]. Another study showed  
26  
27 that low-dose folic acid treatment improves vascular function in CAD patients [24].  
28  
29 Our study suggested that CAVI was higher in HHcy patients, so treatment should be  
30  
31 made to lower homocysteine in HHcy patients in order to reduce arterial stiffness.  
32  
33 **And thorough clinical research should be investigated in future.**

34  
35  
36 However, there were some limitations in the study: the small sample size, cases,  
37  
38 and controls were not perfectly matched. Also some patients with hypertension and  
39  
40 (or) CAD had oral medication such as amlodipine before coming to the hospital, this  
41  
42 might affect our results to a certain extent. So thorough research should be  
43  
44 investigated in future. However, our study suggested that CAVI was a useful  
45  
46 evaluation index for arterial stiffness, and there was positively correlation between  
47  
48 CAVI and Hcy.  
49  
50  
51  
52  
53  
54  
55  
56  
57  
58  
59  
60

1  
2  
3  
4 In conclusion, our study showed that CAVI and Hcy are closely associated  
5  
6 among vascular-related diseases. More studies should be made to investigate the role  
7  
8 of Hcy in the development of arterial stiffness.  
9  
10  
11  
12  
13  
14  
15  
16  
17  
18  
19  
20  
21  
22  
23  
24  
25  
26  
27  
28  
29  
30  
31  
32  
33  
34  
35  
36  
37  
38  
39  
40  
41  
42  
43  
44  
45  
46  
47  
48  
49  
50  
51  
52  
53  
54  
55  
56  
57  
58  
59  
60

For peer review only

### Acknowledgments

This work was supported by grants from [The Capital Health Research and Development of Special](#) to HY Wang (No. 2011-4026-02), and the hospital fund of Peking University Shougang Hospital to Hongyu Wang (No. 2010-Y002) and Jinbo Liu (No. 2012Y04).

### Disclosures

No conflicts of interest, financial or otherwise, are declared by the authors.

**Ethics approval:** From the ethics committee of the Health Science Center, Peking University, China.

## References

- [1] Cavalcante JL, Lima JAC, Redheuil A, Al-Mallah MH. Aortic stiffness. *J Am Coll Cardiol* 2011; 57:1511-22.
- [2] Mancia G, De Backer G, Dominiczak A, et al. 2007 guidelines for the management of arterial hypertension: the Task Force for the Management of Arterial Hypertension of the European Society of Hypertension (ESH) and of the European Society of Cardiology (ESC). *J Hypertens* 2007;25:1105– 87.
- [3] Ni Y, Wang H, Hu D, Zhang W. The Relationship between Pulse Wave Velocity and Pulse Pressure in Chinese Patients with Essential Hypertension. *Hypertens Res* 2003;26:871-874.
- [4] Wang H, Zhang W, Gong L, Hu D, et al. Study of Relationship between Large Artery Distensibility and Left Ventricular Hypertrophy in Patients with Essential Hypertension. *Chin J Cardiol*, 2000;28:177-180.
- [5] Shirai K, Utino J, Otsuka K, Takata M. A novel blood pressure-independent arterial wall stiffness parameter: cardio-ankle vascular index (CAVI). *J Atheroscler Thromb* 2006, 13:101-107.
- [6] Kim KJ, Lee BW, Kim HM, Shin JY, Kang ES, Cha BS, et al. Associations between cardio-ankle vascular index and microvascular complications in type 2 diabetes mellitus patients. *J Atheroscler Thromb* 2011;27;18(4):328-36.
- [7] Takaki A, Ogawa H, Wakeyama T, Iwami T, Kimura M, Hadano Y, et al. Cardio-ankle vascular index is a new noninvasive parameter of arterial stiffness. *Circ J* 2007;71(11):1710-4.

- 1  
2  
3  
4 [8] Antoniadou C, Antonopoulos AS, Tousoulis D, Marinou K, Stefanadis C.  
5  
6 Homocysteine and coronary atherosclerosis: from folate fortification to the recent  
7  
8 clinical trials. *European Heart Journal* (2009) 30, 6–15  
9  
10  
11 [9] Topal G, Brunet A, Millanvoye E, Boucher JL, Rendu F, Devynck MA, et al.  
12  
13 Homocysteine induces oxidative stress by uncoupling of NO synthase activity  
14  
15 through reduction of tetrahydrobiopterin. *Free Radic Biol Med*, 2004; 36: 1532-41.  
16  
17  
18 [10] Meze C, Schumann J, Wagner A, and Gross P. Effects of homocysteine on the  
19  
20 levels of caveolin-1 and eNOS in caveolae of human coronary artery endothelial  
21  
22 cells. *Atherosclerosis*, 2007; 190: 256-63.  
23  
24  
25  
26 [11] He L, Zeng H, Li F, Feng J, Liu S, Liu J, et al. Homocysteine impairs coronary  
27  
28 artery endothelial function by inhibiting tetrahydrobiopterin in patients with  
29  
30 hyperhomocysteinemia. *Am J Physiol Endocrinol Metab* 2010; 299: E1061–E1065.  
31  
32  
33  
34 [12] Kadota K, Takamura N, Aoyagi K, Yamasaki H, Usa T, Nakazato M, et al.  
35  
36 Availability of cardio-ankle vascular index (CAVI) as a screening tool for  
37  
38 atherosclerosis. *Cir J* 2008; 72: 304-308.  
39  
40  
41 [13] Aoun S, Blacher J, Safar ME, Mourad JJ. Diabetes mellitus and renal  
42  
43 failure: effects on large artery stiffness. *Journal of Human Hypertension* 2001;  
44  
45 15:693-700.  
46  
47  
48  
49 [14] Blacher J, Asmar R, Djane S, London GM, Safar ME. Aortic pulse wave velocity  
50  
51 as a marker of cardiovascular risk in hypertensive patients. *Hypertension* 1999; 33:  
52  
53 1111-1117.  
54  
55  
56 [15] Hansen TW, Staessen JA, Torp-Pedersen C, Rasmussen S, Thijs L, Ibsen H, et al.  
57  
58  
59  
60

- 1  
2  
3  
4 Prognostic value of aortic pulse wave velocity as index of arterial stiffness in the  
5  
6 general population. *Circulation*. 2006;113:664-670.  
7
- 8  
9 [16] Takaki A, Ogawa H, Wakeyama T, Iwami T, Kimura M, Hadano Y, et al.  
10  
11 Cardio-Ankle Vascular Index is a New Noninvasive Parameter of Arterial  
12  
13 Stiffness. *Circ J* 2007;71:1710–1714.  
14
- 15  
16 [17]Liu H, Zhang X, Feng X, Li J, Hu M, Yambe T. Effects of metabolic syndrome  
17  
18 on cardio-ankle vascular index in middle-aged and elderly Chinese. *Metab Syndr*  
19  
20 *Relat Disord* 2011 Apr;9(2):105-10. Epub 2010 Nov 22.  
21  
22
- 23  
24 [18] Satoh N, Shimatsu A, Kato Y, Araki R, Koyama K, Okajima T, et al. Evaluation  
25  
26 of the cardio-ankle vascular index, a new indicator of arterial stiffness independent  
27  
28 of blood pressure, in obesity and metabolic syndrome. *Hypertens Res*  
29  
30 2008;31(10):1921-30.  
31  
32
- 33  
34 [19]Horinaka S, Yabe A, Yagi H, Ishimura K, Hara H, Iemua T, Matsuoka H.  
35  
36 Comparison of atherosclerotic indicators between cardio ankle vascular index and  
37  
38 brachial ankle pulse wave velocity. *Angiology* 2009 Aug-Sep;60(4):468-76. Epub  
39  
40 2008 Nov 17.  
41  
42
- 43  
44 [20]Takaki A, Ogawa H, Wakeyama T, Iwami T, Kimura M, Hasano Y, et al.  
45  
46 Cardio-ankle vascular index is superior to brachial-ankle pulse wave velocity as an  
47  
48 index of arterial stiffness. *Hypertens Res* 2008 Jul;31(7):1347-55.  
49  
50
- 51  
52 [21]Horinaka S, Yabe A, Yagi H, Ishimura K, Hara H, Iemura T, et al. Cardio-ankle  
53  
54 vascular index could reflect plaque burden in the coronary artery. *Angiology* 2011  
55  
56 Jul;62(5):401-8. Epub 2011 Mar 18.  
57  
58  
59  
60

- 1  
2  
3  
4 [22] Ward M, McNulty H, McPartlin J, Strain JJ, Weir DG, Scott JM. Plasma  
5  
6 homocysteine, a risk factor for cardiovascular disease, is lowered by physiological  
7  
8 doses of folic acid. *QJM* 1997;90:519–524.  
9  
10  
11 [23] Lange H, Suryapranata H, De Luca G, Borner C, Dille J, Kallmayer K, et al.  
12  
13 Folate therapy and in-stent restenosis after coronary stenting. *N Engl J Med*  
14  
15 2004;350:2673–2681.  
16  
17  
18 [24] Shirodaria C, Antoniadou C, Lee J, Jackson CE, Robson MD, Francis JM, et al.  
19  
20 Global improvement of vascular function and redox state with low-dose folic acid:  
21  
22 implications for folate therapy in patients with coronary artery disease.  
23  
24 *Circulation*. 2007; May 1;115(17):2262-70.  
25  
26  
27  
28 [25] Torrado J, Bia D, Zócalo Y, Farro I, Farro F, Valero M, et al. Carotid-radial pulse  
29  
30 wave velocity as a discriminator of intrinsic wall alterations during evaluation of  
31  
32 endothelial function by flow-mediated dilatation. *Conf Proc IEEE Eng Med Biol*  
33  
34 *Soc*. 2011;2011:6458-61.  
35  
36  
37  
38 [26] Lee YS, Kim KS, Nam CW, Han SW, Hur SH, Kim YN, et al. Clinical  
39  
40 implication of carotid-radial pulse wave velocity for patients with coronary artery  
41  
42 disease. *Korean Circulation J* 2006;36:565-572.  
43  
44  
45  
46  
47  
48  
49  
50  
51  
52  
53  
54  
55  
56  
57  
58  
59  
60

**Figure legends**

Figure 1 Relationship between CF-PWV and Hcy (Fig 1A) , CR-PWV and Hcy (Fig 1B) in the entire study group. Hcy: homocysteine. CF-PWV: carotid-femoral pulse wave velocity. CR-PWV: carotid-radial pulse wave velocity.

Figure 2 Relationship between CAVI and Hcy in the entire study group. Hcy: homocysteine. CAVI: cardio-ankle vascular index.



Table 1 Clinical characteristics in different groups according to the numbers of vascular-related diseases.

| Characteristics        | Group 0<br>N=12 | Group 1<br>N=33 | Group 2<br>N=34 | Group 3<br>N=9 | p values |
|------------------------|-----------------|-----------------|-----------------|----------------|----------|
| Age, y                 | 54.4±9.5        | 63.5±13.1       | 73.2±10.0       | 76.1±10.3      | <0.01    |
| Sex(Male/Female)       | 4/8             | 20/13           | 16/18           | 6/3            | 0.283    |
| BMI, kg/m <sup>2</sup> | 22.4±3.3        | 23.9±3.9        | 23.3±4.4        | 25.7±2.6       | 0.32     |
| LDL, mmol/L            | 1.82±0.4        | 1.83±0.6        | 1.71±0.4        | 1.84±0.2       | 0.759    |
| HDL, mmol/L            | 1.90±2.9        | 0.95±0.2        | 1.01±0.3        | 1.00±0.25      | 0.078    |
| Hs-CRP, mg/L           | 4.73±10.8       | 8.14±15.3       | 10.79±15.3      | 17.2±35.8      | 0.496    |
| HbA1c %                | 5.78±0.3        | 5.92±0.5        | 5.86±0.3        | 5.98±1.7       | 0.917    |
| Hcy (umol/L)           | 11.0±2.8        | 19.0±9.1        | 16.7±6.4        | 21.1±8.5       | 0.006    |
| Urinary Microalbumin   | 3.66±4.4        | 16.69±39.0      | 7.50±10.9       | 13.90±22.4     | 0.522    |
| Heart rate             | 75.5±9.6        | 72.4±13.3       | 74.7±13.4       | 69.4±8.5       | 0.621    |
| ABI                    | 1.10±0.13       | 1.10±0.09       | 1.06±0.14       | 1.02±0.21      | 0.284    |
| SBP, mmHg              | 126.0±13.8      | 138.6±19.8      | 145.3±23.1      | 154.3±23.4     | 0.012    |
| DBP, mmHg              | 79.5±7.2        | 81.7±9.5        | 82.7±9.7        | 86.1±9.9       | 0.479    |
| CF-PWV                 | 9.17±2.6        | 12.33±3.0       | 13.03±2.8       | 13.85±1.86     | <0.001   |
| CR-PWV                 | 9.34±0.92       | 10.12±1.98      | 9.8±2.21        | 10.29±2.96     | 0.648    |
| CAVI                   | 7.51±0.9        | 8.23±2.4        | 9.09±2.3        | 9.34±2.0       | 0.08     |

CAD: coronary artery disease. ASO: arteriosclerosis obliterans. Group 0: without diseases of hypertension, CAD, ASO; group 1: with one of diseases of hypertension, CAD, ASO; group 2: with two of diseases of hypertension, CAD, ASO; group 3: with all diseases of hypertension, CAD, ASO; BMI: body mass index. LDL: low-density lipoprotein. HDL: high-density lipoprotein. CRP: C-reactive protein. Hcy: homocysteine. ABI: ankle-brachial index. SBP: systolic blood pressure; DBP: diastolic blood pressure. CF-PWV: carotid-femoral pulse wave velocity. CR-PWV: carotid-radial pulse wave velocity. CAVI: cardio-ankle vascular index. The differences between groups were analyzed by one-way ANOVA. Proportions were analyzed by  $\chi^2$ -test.

Table 2 Clinical characteristics in patients with Hcy&lt;15umol/ and Hcy≥15umol/.

| Characteristics        | Hcy<15umol/L<br>(n=43) | Hcy≥15umol/L<br>(n=45) | p values |
|------------------------|------------------------|------------------------|----------|
| Age, y                 | 61.9±13.0              | 71.9±11.5              | <0.01    |
| Sex(Male/Female)       | 14/29                  | 32/13                  | <0.001   |
| BMI, kg/m <sup>2</sup> | 23.9±4.2               | 23.3±3.8               | 0.48     |
| Hypertension, No(%)    | 26(60.5)               | 31(68.9)               | 0.41     |
| CAD, No(%)             | 18(41.2)               | 25(55.6)               | 0.2      |
| ASO, No(%)             | 8(18.6)                | 17(37.8)               | 0.03     |
| LDL , mmol/L           | 1.72±0.4               | 1.84±0.6               | 0.31     |
| HDL , mmol/L           | 1.19±1.5               | 1.04±0.3               | 0.53     |
| Hs-CRP, mg/L           | 7.70±0.17              | 11.34±19.5             | 0.36     |
| HbA1c %                | 5.80±0.3               | 5.96±0.8               | 0.34     |
| Hcy umol/L             | 11.89±2.0              | 22.19±8.0              | <0.001   |
| Urinary Microalbumin   | 4.35±4.3               | 17.58±35.0             | 0.057    |
| Heartrate              | 72.0±9.7               | 74.9±14.5              | 0.28     |
| ABI                    | 1.09±0.12              | 1.06±0.13              | 0.23     |
| SBP, mmHg              | 134.1±18.2             | 147.0±23.2             | 0.005    |
| DBP, mmHg              | 81.2±8.4               | 83.1±10.0              | 0.36     |
| CF-PWV                 | 10.8±2.5               | 13.7±3.0               | <0.001   |
| CR-PWV                 | 9.2±1.6                | 10.6±2.1               | 0.001    |
| CAVI                   | 7.79±2.1               | 9.30±2.1               | 0.001    |

Results were shown as mean ±SD unless stand otherwise. CAD: coronary artery disease. ASO: arteriosclerosis obliterans. BMI: body mass index. LDL: low-density lipoprotein. HDL: high-density lipoprotein. CRP: C-reactive protein. Hcy: homocysteine. ABI: ankle-brachial index. SBP: systolic blood pressure; DBP: diastolic blood pressure. CF-PWV: carotid-femoral pulse wave velocity. CR-PWV: carotid-radial pulse wave velocity. CAVI: cardio-ankle vascular index. The difference between groups were analyzed by Student' *t*-test. Proportions were analyzed by  $\chi^2$ -test.

Fig 1

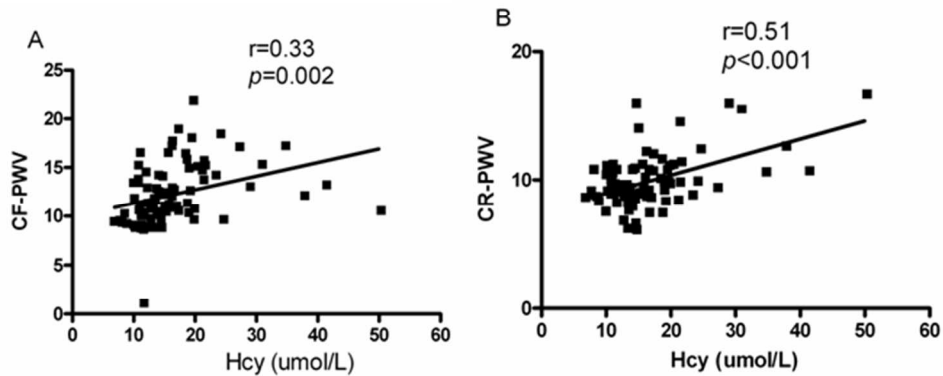

Figure 1 Relationship between CF-PWV and Hcy (Fig 1A) , CR-PWV and Hcy (Fig 1B) in the entire study group. Hcy: homocysteine. CF-PWV: carotid-femoral pulse wave velocity. CR-PWV: carotid-radial pulse wave velocity.

58x27mm (300 x 300 DPI)

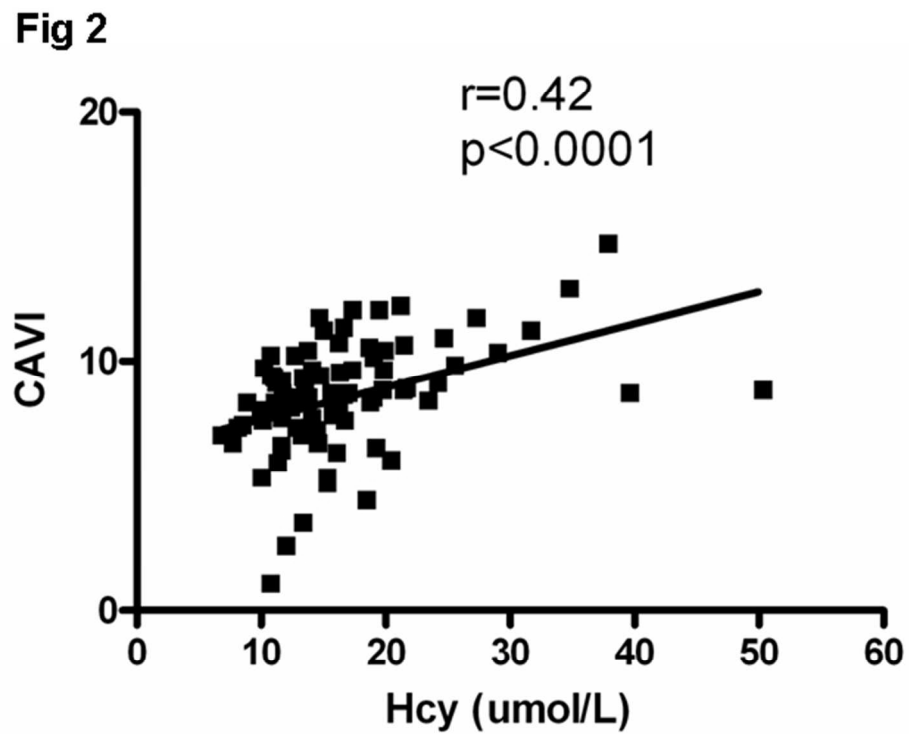

32 Figure 2 Relationship between CAVI and Hcy in the entire study group. Hcy: homocysteine. CAVI: cardio-  
33 ankle vascular index.  
34 57x43mm (300 x 300 DPI)

35  
36  
37  
38  
39  
40  
41  
42  
43  
44  
45  
46  
47  
48  
49  
50  
51  
52  
53  
54  
55  
56  
57  
58  
59  
60



**Descriptive study of possible link between cardio-ankle vascular index and homocysteine in vascular-related diseases**

|                                 |                                                                                                                                                                                                                                                                                                                                                                                                                                                                                                                                                                            |
|---------------------------------|----------------------------------------------------------------------------------------------------------------------------------------------------------------------------------------------------------------------------------------------------------------------------------------------------------------------------------------------------------------------------------------------------------------------------------------------------------------------------------------------------------------------------------------------------------------------------|
| Journal:                        | <i>BMJ Open</i>                                                                                                                                                                                                                                                                                                                                                                                                                                                                                                                                                            |
| Manuscript ID:                  | bmjopen-2012-002483.R2                                                                                                                                                                                                                                                                                                                                                                                                                                                                                                                                                     |
| Article Type:                   | Research                                                                                                                                                                                                                                                                                                                                                                                                                                                                                                                                                                   |
| Date Submitted by the Author:   | 16-Feb-2013                                                                                                                                                                                                                                                                                                                                                                                                                                                                                                                                                                |
| Complete List of Authors:       | Liu, Jinbo; Department of Vascular Medicine<br>Wang, Hongyu; Peking University Shougang Hospital, Department of Vascular Medicine<br>Wang, Qi; Peking University Shougang Hospital, Department of Vascular Medicine<br>Zhao, Hongwei; Peking University Shougang Hospital, Department of Vascular Medicine<br>Shi, Hongyan; Peking University Shougang Hospital, Department of Vascular Medicine<br>Yu, Xiaolan; Peking University Shougang Hospital, Department of Vascular Medicine<br>Fu, Xiaobao; Peking University Shougang Hospital, Department of Vascular Medicine |
| <b>Primary Subject Heading</b>: | Cardiovascular medicine                                                                                                                                                                                                                                                                                                                                                                                                                                                                                                                                                    |
| Secondary Subject Heading:      | Cardiovascular medicine                                                                                                                                                                                                                                                                                                                                                                                                                                                                                                                                                    |
| Keywords:                       | Coronary heart disease < CARDIOLOGY, VASCULAR MEDICINE, Hypertension < CARDIOLOGY                                                                                                                                                                                                                                                                                                                                                                                                                                                                                          |
|                                 |                                                                                                                                                                                                                                                                                                                                                                                                                                                                                                                                                                            |

SCHOLARONE™  
Manuscripts

1  
2  
3  
4 Descriptive study of possible link between cardio-ankle vascular index  
5  
6 and homocysteine in vascular-related diseases  
7  
8

9 Hongyu Wang<sup>\*,1,#</sup>, Jinbo Liu<sup>\*,1</sup>, Qi Wang<sup>1</sup>, Hongwei Zhao<sup>1</sup>, Hongyan Shi<sup>1</sup>,  
10  
11 Xiaolan Yu<sup>1</sup>, Xiaobao Fu<sup>1</sup>  
12  
13

14  
15 <sup>1</sup> Department of Vascular Medicine; Peking University Shougang Hospital, Beijing  
16  
17 100144, P. R. of China.  
18  
19

20  
21 \* Equal contributors  
22  
23

24  
25 #Corresponding Author: Hongyu Wang, Vascular Medicine; Peking University  
26  
27 Shougang Hospital; Beijing 100144, P. R. of China.  
28  
29

30  
31 Tel (Fax): +8610-57830226; +8610-57830226  
32

33  
34 Email: [hongyuwang@188.com](mailto:hongyuwang@188.com)  
35  
36

37  
38 *Running title:* CAVI and Homocysteine  
39  
40  
41  
42  
43  
44  
45  
46  
47  
48  
49  
50  
51  
52  
53  
54  
55  
56  
57  
58  
59  
60

## Abstract

**Objectives:** Cardio-ankle vascular index (CAVI) is a new index of arterial stiffness independent of immediate blood pressure. Homocysteine (Hcy) is an independent risk factor for vascular diseases. The aim of this study was to investigate the relationship between Hcy and CAVI in vascular-related diseases.

**Design:** Descriptive Research.

**Participants:** 88 patients (M/F 46/42) with or without hypertension, coronary artery disease or arteriosclerosis obliterans were enrolled into our study. They were divided into two groups according to the level of Hcy.

**Methods:** CAVI, carotid-femoral pulse wave velocity (CF-PWV) and carotid-radial pulse wave velocity (CR-PWV) were measured by VS-1000 and Complior apparatus.

**Results:** There was significant correlation between Hcy and CF-PWV, CR-PWV, CAVI in the entire group ( $r=0.33$ ,  $p=0.002$ ;  $r=0.51$ ,  $p<0.001$ ;  $r=0.42$ ,  $p<0.001$ ; respectively). And there was significant correlation between Hcy and CF-PWV, CR-PWV, CAVI in the vascular-related disease group ( $r=0.23$ ,  $p=0.048$ ;  $r=0.51$ ,  $p<0.001$ ;  $r=0.392$ ,  $p=0.001$ ; respectively). The level of Hcy was significantly higher in patients with one or more vascular diseases than in patients without vascular diseases. The levels of CF-PWV, CR-PWV, and CAVI were significantly higher in Hcy  $\geq 15\mu\text{mol/L}$  group than in Hcy  $<15\mu\text{mol/L}$  group ( $13.7\pm 3.0$  vs  $10.8\pm 2.5$ ,  $p<0.001$ ;  $10.6\pm 2.1$  vs  $9.2\pm 1.6$ ,  $p=0.001$ ;  $9.30\pm 2.1$  vs  $7.79\pm 2.1$ ,  $p=0.001$ ; respectively). Multiple linear regression showed that Hcy, body mass index (BMI), and age were independent associating factors of CAVI in the entire study group ( $\beta=0.421$ ,  $p=0.001$ ;

1  
2  
3  
4  $\beta = -0.309, p=0.006; \beta=0.297, p=0.012;$  respectively). And Hcy, BMI, and age were  
5  
6 independent influencing factors of CAVI in vascular-related disease group ( $\beta=0.434,$   
7  
8  $p=0.001; \beta = -0.331, p=0.009; \beta=0.288, p=0.022;$  respectively).  
9  
10

11 **Conclusions:** CAVI was positively correlated with homocysteine in vascular-related  
12  
13 diseases.  
14

15  
16 **Keywords:** Cardio-ankle vascular index; Homocysteine; Vascular-related diseases  
17  
18  
19  
20  
21  
22  
23  
24  
25  
26  
27  
28  
29  
30  
31  
32  
33  
34  
35  
36  
37  
38  
39  
40  
41  
42  
43  
44  
45  
46  
47  
48  
49  
50  
51  
52  
53  
54  
55  
56  
57  
58  
59  
60



1  
2  
3 Article summary  
4

5 1. Article focus  
6

7 To investigate the relationship between homocysteine (Hcy) and Cardio-ankle  
8 vascular index (CAVI) in vascular-related diseases.  
9

10  
11 2. Key messages

12 Homocysteine was positively correlated with CAVI in vascular-related diseases.

13 3. Strengths and limitations of this study

14  
15 Strengths of this study: our present study firstly showed the relationship between  
16 Hcy and CAVI in vascular-related diseases.  
17  
18

19  
20 Limitations of this study: the small **sample** size, cases, and controls were not  
21 perfectly matched.  
22  
23  
24  
25  
26  
27  
28  
29  
30  
31  
32  
33  
34  
35  
36  
37  
38  
39  
40  
41  
42  
43  
44  
45  
46  
47  
48  
49  
50  
51  
52  
53  
54  
55  
56  
57  
58  
59  
60

## 1. Introduction

Arterial stiffness is a strong predictor of future cardiovascular events and all-cause mortality. And it is one of the earliest detectable manifestations of adverse structural and functional changes within the vessel wall [1]. Arterial stiffness can be measured by pulse wave velocity (PWV), which is considered as the gold standard method suggested by European Society of Hypertension/European Society of Cardiology guidelines [2]. And our previous studies also showed that PWV was positively correlated with pulse pressure and it was increased in hypertension patients with left ventricular hypertrophy [3, 4]. However, PWV itself is essentially dependent on blood pressure especially immediate blood pressure. Cardio-ankle vascular index (CAVI), a new index of arterial stiffness independent of blood pressure, is recently developed by measuring of PWV and blood pressure [5]. Recent studies have showed that CAVI was a reliable index of arterial stiffness in many vascular-related diseases [6,7].

Homocysteine has been considered as an independent risk factor for atherosclerosis [8]. The possible mechanism of this process includes endothelial cell damage, vascular endothelial dysfunction and enhanced oxidative stress. Recent studies showed that homocysteine caused endothelial dysfunction through inhibiting the reactions between endothelial nitric oxide synthase (eNOS) and tetrahydrobiopterin (BH4) [9,10]. Our previous study showed that chronic hyperhomocysteinemia contributed to coronary artery disease by inhibiting dysfunction of the coronary artery endothelium [11]. Increased arterial stiffness

1  
2  
3  
4 resulted from many factors such as endothelial dysfunction, smooth muscle cells  
5  
6 proliferation, thickening of vascular wall. Kadota et al had showed positive  
7  
8 correlation between Hcy and CAVI in general population [12]. However, the  
9  
10 relationship between CAVI and Hcy in vascular-related diseases such as hypertension,  
11  
12 coronary artery disease (CAD), and arteriosclerosis obliterans (ASO) was still  
13  
14 unknown, especially in patients with one more kinds of vascular-related diseases. In  
15  
16 the present study, we investigated the possible link between CAVI and homocysteine  
17  
18 in vascular-related diseases such as hypertension, CAD and ASO.  
19  
20  
21  
22  
23  
24  
25

## 26 **2. Materials and methods**

### 27 *2.1 Subjects*

28  
29  
30  
31 88 patients (M/F: 46/42) with or without hypertension, CAD or ASO from  
32  
33 vascular medicine department of Peking University Shougang Hospital from February  
34  
35 2012 to April 2012 were enrolled into our study. There were 57 patients with  
36  
37 hypertension, 43 with CAD, and 25 patients with ASO in the whole study group. And  
38  
39 there were 12 patients without hypertension, CAD and ASO but suffering one of these  
40  
41 two diseases, acute upper respiratory tract infection or acute gastritis.  
42  
43  
44  
45

46  
47 Hypertension was defined as blood pressure measurement  $\geq 140/90$ mmHg in  
48  
49 three occasions at rest or subjects with known cases of diagnosed hypertension before  
50  
51 and taking antihypertensive drugs at present. CAD or ASO was defined as the  
52  
53 narrowing or blockage of coronary artery or lower extremity artery diagnosed by  
54  
55 angiography. Hyperhomocysteinemia was defined as the level of plasma Hcy  $\geq$   
56  
57  
58  
59  
60

1  
2  
3  
4 15umol/L[11].  
5

6 Enrolled patients were divided into four groups according to numbers of  
7  
8 suffering vascular-related diseases. Also they were divided into two groups according  
9  
10 to level of Hcy (Hcy <15umol/L group, N=43, and Hcy  $\geq$ 15umol/L group, N=45).  
11  
12 All participants gave their written informed consent. This study was approved by the  
13  
14 ethics committee of the Health Science Center, Peking University.  
15  
16  
17  
18  
19  
20

### 21 *2.2 Pulse wave velocity measurement*

22

23 Arterial stiffness was evaluated by measuring automatic PWV using the  
24  
25 Complior apparatus. The basic principle of PWV assessment is that pressure pulse  
26  
27 generated by ventricular ejection is propagated along the arterial system at a speed  
28  
29 determined by elasticity of the arterial wall. Knowing the distance and pulse transit  
30  
31 time, the velocity can be calculated. Patients were placed in recumbent position and,  
32  
33 after a 10-minute rest, underwent PWV measurement and carotid-femoral PWV  
34  
35 (CF-PWV) and carotid-radial PWV (CR-PWV) was obtained automatically. CF-PWV  
36  
37 and CR-PWV are both reliable index for arterial stiffness of vascular diseases  
38  
39 [2,26].And we chose the right PWV for analysis.  
40  
41  
42  
43  
44  
45  
46  
47  
48

### 49 *2.3 The assessment of CAVI*

50

51 CAVI was recorded using a VaseraVS-1000 vascular screening system (Fukuda  
52  
53 Denshi, Tokyo, Japan) with the participant resting in a supine position. ECG  
54  
55 electrodes were placed on both wrists, a microphone for detecting heart sounds was  
56  
57  
58  
59  
60

1  
2  
3  
4 placed on the sternum, and cuffs were wrapped around both the arms and ankles.  
5  
6 After automatic measurements, obtained data were analyzed by software, and the  
7  
8 value of CAVI was obtained automatically [16]. And we chose the right CAVI for  
9  
10 analysis.  
11  
12

#### 13 14 15 16 2.4 Laboratory measurements 17

18  
19 Blood samples were drawn from an antecubital vein in the morning after  
20  
21 overnight fasting and collected into vacuum tubes containing EDTA for the  
22  
23 measurement of plasma lipid and lipoprotein levels. Total cholesterol, high-density  
24  
25 lipoprotein (HDL) cholesterol, and triglyceride levels were analyzed by colorimetric  
26  
27 enzymatic assays with the use of an autoanalyzer (HITACHI-7170, Hitachi, Tokyo,  
28  
29 Japan). Low-density lipoprotein cholesterol (LDL-C) levels were calculated. Fasting  
30  
31 plasma glucose, homocysteine, hs-C reactive protein were also determined by  
32  
33 colorimetric methods of related metabolic products using the same autoanalyzer at the  
34  
35 central chemistry laboratory of the Peking University Shougang Hospital.  
36  
37  
38  
39  
40  
41  
42  
43

#### 44 2.5 Statistical analysis 45

46  
47 SPSS 13.0 was used as statistical software in the present study. The differences  
48  
49 between groups were analyzed by Student' *t*-test and one-way ANOVA. Proportions  
50  
51 were analyzed by  $\chi^2$ -test. Correlation coefficient was done to find linear relation  
52  
53 between different variables using Spearman correlation coefficient. Multiple linear  
54  
55 regressions were used to estimate the coefficients of the linear equation, involving  
56  
57  
58  
59  
60

1  
2  
3 independent variables that affected the value of the dependent variables. Values were  
4 shown as mean  $\pm$  SD unless stand otherwise.  $p < 0.05$  (2-tailed) was considered  
5 statistically significant.  
6  
7  
8  
9

### 10 11 12 13 **3. Results**

#### 14 15 *3.1 Clinical characteristics of the study participants*

16  
17 The clinical characteristics of study participants are shown in Table 1. Among  
18 these subjects, 33 patients had only one of these three vascular-related diseases, 34  
19 patients had two of these three vascular-related diseases, 9 patients had all of these  
20 three diseases, and 12 subjects with none of vascular-related diseases. Our results  
21 showed that with the increasing numbers of suffered vascular-related diseases, the  
22 level of Hcy was increasing. Similar results were also found in the parameters of  
23 CF-PWV and CAVI. However, we found there was significant difference about age  
24 between these four groups.  
25  
26  
27  
28  
29  
30  
31  
32  
33  
34  
35  
36  
37  
38

39 Next, we divided subjects into two groups according to the level of Hcy. As  
40 shown in Table 2, the level of CAVI was significant higher in patients with Hcy  $\geq$   
41 15umol/L than in group with Hcy < 15umol/L. The similar result was also found in  
42 another evaluation index of arterial stiffness-PWV. However, there was significant  
43 difference about age and sex between these two groups.  
44  
45  
46  
47  
48  
49  
50  
51  
52  
53

#### 54 *3.2 Pearson correlations between PWV, CAVI and Hcy*

55  
56 PWV is a golden evaluation of arterial stiffness of vascular diseases. There are  
57  
58  
59  
60

1  
2  
3  
4 some kinds of PWV according to different arteries, such as carotid-femoral pulse  
5  
6 wave velocity (CF-PWV), and carotid-radial pulse wave velocity (CR-PWV).  
7  
8 CF-PWV and CR-PWV are both reliable index for arterial stiffness of vascular  
9  
10 diseases [2,26]. In the present study, patients with ASO had bilateral vascular lesions.  
11  
12 And there was no significant difference between right side ankle-brachial index (ABI)  
13  
14 and left side ABI in the entire study group ( $1.08 \pm 0.13$  vs  $1.07 \pm 0.15$ ,  $p=0.612$ ). In  
15  
16 addition, there was no significant difference between right side ABI and left side ABI  
17  
18 in subjects with ASO ( $1.01 \pm 0.18$  vs  $1.05 \pm 0.14$ ,  $p=0.376$ ). And we chose the right  
19  
20 PWV and CAVI for analysis.  
21  
22  
23  
24  
25

26 As shown in Fig 1. CF-PWV was positively correlated with Hcy in entire group  
27  
28 ( $r=0.33$ ,  $p=0.002$ , Fig 1A). There was also significant positive correlation between  
29  
30 CR-PWV and Hcy in all patients ( $r=0.51$ ,  $p<0.001$ , Fig 1B). In addition, our results  
31  
32 showed that there was significant correlation between Hcy and CF-PWV, CR-PWV in  
33  
34 the vascular-related disease group ( $r=0.23$ ,  $p=0.048$ ;  $r=0.51$ ,  $p<0.001$ , respectively).  
35  
36  
37  
38

39 CAVI, a new index of arterial stiffness independent of blood pressure, is recently  
40  
41 developed by measuring of PWV and blood pressure. And CAVI was not affected by  
42  
43 immediate blood pressure. As shown in Fig2, there was significant positive correlation  
44  
45 between CAVI and Hcy in all patients ( $r=0.42$ ,  $p<0.0001$ ). Also we found there was  
46  
47 significant correlation between Hcy and CAVI in the vascular-related disease group  
48  
49 ( $r=0.392$ ,  $p=0.001$ ). However, there was no significant correlation between Hcy and  
50  
51 CF-PWV, CR-PWV, CAVI in patients without vascular-related diseases in the present  
52  
53 study ( $r=0.14$ ,  $p=0.661$ ;  $r=0.152$ ,  $p=0.620$ ;  $r=0.056$ ,  $p=0.855$ ; respectively).  
54  
55  
56  
57  
58  
59  
60

1  
2  
3  
4 As shown in Table 1 and Table 2, there was significant difference about age or  
5  
6 sex between groups. So next, we investigated the possible relationship between CAVI,  
7  
8 PWV and Hcy after adjusting the variable of age or sex. Our results showed that there  
9  
10 was still significant correlation between CAVI and Hcy after adjustment for age in the  
11  
12 entire study group ( $r=0.293$ ,  $p=0.008$ ). Also a positive correlation between PWV and  
13  
14 Hcy was found after age adjusted in the entire study group (CF-PWV vs Hcy,  $r=0.282$ ,  
15  
16  $p=0.010$ ; CR-PWV vs Hcy,  $r=0.462$ ,  $p<0.001$ ; respectively). In addition, there was  
17  
18 significant correlation between Hcy and CF-PWV, CR-PWV, CAVI after age and sex  
19  
20 adjusted in the entire study group ( $r=0.26$ ,  $p=0.022$ ;  $r=0.38$ ,  $p=0.001$ ;  $r=0.27$ ,  $p=0.014$ ;  
21  
22 respectively).

23  
24  
25  
26  
27  
28  
29 There were 12 patients without vascular-related diseases in the entire study group,  
30  
31 so in next step, we analyzed relationship between PWV, CAVI and Hcy in patients  
32  
33 with vascular-related diseases. Our results showed that there was significant  
34  
35 correlation between Hcy and CR-PWV, CAVI after adjustment for age in the  
36  
37 vascular-related disease group ( $r=0.48$ ,  $p<0.001$ ;  $r=0.321$ ,  $p=0.007$ ; respectively),  
38  
39 without significant correlation between Hcy and CF-PWV ( $r=0.21$ ,  $p=0.079$ ). After  
40  
41 adjustment for age and sex, significant correlation between Hcy and CR-PWV, CAVI  
42  
43 was found in the vascular-related disease group ( $r=0.40$ ,  $p=0.001$ ;  $r=0.298$ ,  $p=0.013$ ;  
44  
45 respectively). However, there was no significant correlation between Hcy and  
46  
47 CF-PWV after age and sex adjusted ( $r=0.193$ ,  $p=0.115$ ).

### 56 3.3 Multiple linear regression analysis

57  
58  
59  
60



1  
2  
3  
4 Multiple linear regressions were used to estimate the coefficients of the linear  
5  
6 equation, involving independent variables that affected the value of CAVI. Our results  
7  
8 showed that Hcy, BMI, and age were independent influencing factors of CAVI in the  
9  
10 entire study group ( $\beta=0.421$ ,  $p=0.001$ ;  $\beta= -0.309$ ,  $p=0.006$ ;  $\beta=0.297$ ,  $p=0.012$ ;  
11  
12 respectively). And Hcy, BMI, and age were independent influencing factors of CAVI  
13  
14 in vascular-related disease group ( $\beta=0.434$ ,  $p=0.001$ ;  $\beta= -0.331$ ,  $p=0.009$ ;  $\beta=0.288$ ,  
15  
16  $p=0.022$ ; respectively).  
17  
18  
19  
20  
21  
22  
23  
24  
25  
26  
27  
28  
29  
30  
31  
32  
33  
34  
35  
36  
37  
38  
39  
40  
41  
42  
43  
44  
45  
46  
47  
48  
49  
50  
51  
52  
53  
54  
55  
56  
57  
58  
59  
60

#### 4. Discussion

In the present study, we found that there was positive correlation between Hcy and CAVI in vascular-related diseases. CAVI and PWV were higher in patients with Hcy  $\geq 15\mu\text{mol/L}$ , and Hcy was an independent influencing factor of CAVI in vascular-related diseases.

An increase in arterial stiffness is not only a pathological status of hypertension, diabetes and coronary artery disease but also a strong predictor for the cardiovascular morbidity and mortality caused by these diseases. With the increasing of arterial stiffness, the incidence of hypertension, coronary heart disease increases. And arterial stiffness can be measured by pulse wave velocity (PWV) suggested by European Society of Hypertension/European Society of Cardiology guidelines. A lot of studies have showed the effect of PWV in the evaluation of arterial stiffness of vascular diseases. Aortic PWV was increasing in patients with diabetes mellitus or end-stage renal disease, indicating a higher arterial stiffness compared with health persons [13]. A research of 710 hypertension patients revealed that aortic PWV is a useful marker and predictor of cardiovascular risk in these subjects [14]. Recently, in a prospective study of general Danish population, the investigator found that aortic PWV was a useful predictor for cardiovascular outcomes above and beyond traditional cardiovascular risk factors such as 24-hour mean blood pressure [15]. Recent study showed that CR-PWV was a discriminator of intrinsic wall alterations during evaluation of endothelial function by flow-mediated dilatation and CR-PWV may predict the severity of the CAD [25,26]. Our present study showed that CF-PWV and

1  
2  
3  
4 CR-PWV were higher in patients with vascular-related diseases than in subjects  
5  
6 without vascular-related diseases ( $12.80 \pm 2.9$  vs  $9.17 \pm 2.6$ ,  $p < 0.001$ ;  $10.00 \pm 2.2$  vs  
7  
8  $9.34 \pm 0.92$ ,  $p = 0.08$ , respectively). However, PWV itself is essentially dependent on  
9  
10 blood pressure, especially immediate blood pressure. Cardio-ankle vascular index  
11  
12 (CAVI), a new index of arterial stiffness, is derived from stiffness parameter  $\beta$ , which  
13  
14 is detected by carotid ultrasonic measurement [16].  
15  
16  
17

18  
19 CAVI is a new evaluation index of arterial stiffness independent of immediate  
20  
21 blood pressure. Recent studies have showed the role of CAVI in the prediction of  
22  
23 vascular events in vascular-related diseases such as metabolic syndrome (MS),  
24  
25 diabetes, CAD, and so on. In MS patients, there was significant positive correlation  
26  
27 between CAVI and waist circumference, and CAVI increased significantly with the  
28  
29 number of metabolic syndrome components [17]. In another MS study, they found  
30  
31 that CAVI was significantly decreased after 3-month period weight-reduction therapy  
32  
33 through diet and exercise, so the determination of arterial stiffness by CAVI may be  
34  
35 useful for evaluating and managing the cardiovascular diseases risks of MS patients  
36  
37 [18]. In a comparative study, researchers showed that the diagnostic accuracy of CAD  
38  
39 was significantly higher in the CAVI than in the brachial ankle PWV, which suggested  
40  
41 that CAVI had increased performance over brachial ankle PWV in predicting the  
42  
43 coronary artery disease [16, 17]. Namekata showed that the CAVI method was a  
44  
45 useful tool to screen persons with moderate to advanced levels of arteriosclerosis.  
46  
47 CAD is one of fatal and disabling diseases, some researchers found that CAVI was  
48  
49 significantly correlated with percentage plaque area in coronary arterial disease [21].  
50  
51  
52  
53  
54  
55  
56  
57  
58  
59  
60

1  
2  
3  
4 A lot of studies have showed that CAVI was a reliable evaluation index of  
5  
6 vascular-related diseases. Our present study showed that with the increasing numbers  
7  
8 of vascular-related diseases suffering, the level of CAVI was increasing (Table 1).  
9  
10 CAVI was significantly higher in patients with vascular-related diseases than in  
11  
12 control subjects ( $8.73 \pm 2.3$  vs  $7.51 \pm 0.9$ ,  $p=0.002$ ). And we also found significant  
13  
14 correlation between PWV and CAVI in the entire group (CAVI & CF-PWV:  $r=0.382$ ,  
15  
16  $p<0.001$ ; CAVI & CR-PWV:  $r=0.225$ ,  $p=0.039$ , respectively).  
17  
18  
19  
20

21 Homocysteine (Hcy) is an independent risk factor of cardiovascular diseases.  
22  
23 Hyperhomocysteinemia (HHcy) has been found in more than one half of patients with  
24  
25 hypertension. The possible mechanism of this process includes endothelial cell  
26  
27 damage, vascular endothelial dysfunction and enhanced oxidative stress [9,10]. Our  
28  
29 previous study showed that chronic hyperhomocysteinemia contributed to coronary  
30  
31 artery disease by inhibiting dysfunction of the coronary artery endothelium [11]. So  
32  
33 Hcy might damage the endothelium through complex mechanisms resulting  
34  
35 endothelial dysfunction. Also Hcy could promote the proliferation of smooth muscle  
36  
37 cells through inflammation and so on. Endothelial dysfunction and proliferation of  
38  
39 smooth muscle cells of arterial medium could lead to the increasing of arterial  
40  
41 stiffness. Previous study had showed positive correlation between Hcy and CAVI in  
42  
43 general population [12]. However, there was little research about the relationship  
44  
45 between Hcy and CAVI in patients with one more kinds of vascular-related diseases.  
46  
47 In the present study, we found that CAVI was positively correlated with Hcy even  
48  
49 after adjustment of other parameters, such as age and sex. The similar result was also  
50  
51  
52  
53  
54  
55  
56  
57  
58  
59  
60

1  
2  
3  
4 found between PWV and Hcy. Hcy increases not only in hypertension patients but  
5  
6 also in other vascular diseases. Hcy participates in the pathophysiological process of  
7  
8 these diseases. Hyperhomocysteinemia was defined as the level of Hcy  $\geq 15\mu\text{mol/L}$ .

9  
10  
11 Next, we compared the arterial stiffness between HHcy group and patients with Hcy  
12  
13  $< 15\mu\text{mol/L}$ . As shown in Table 2, the levels of PWV and CAVI were significantly  
14  
15 higher in group with Hcy  $\geq 15\mu\text{mol/L}$  than in group with Hcy  $< 15\mu\text{mol/L}$ . Finally,  
16  
17 our research showed that Hcy was an independent influencing factor of CAVI in  
18  
19 vascular-related diseases. Folate administration has been consistently shown to reduce  
20  
21 plasma Hcy even in healthy individuals without elevated Hcy levels [22]. Lange et al  
22  
23 found that folic acid treatment could reduce frequency of restenosis after angioplasty  
24  
25 in patients with markedly elevated homocysteine levels [23]. Another study showed  
26  
27 that low-dose folic acid treatment improves vascular function in CAD patients [24].  
28  
29 Our study suggested that CAVI was higher in HHcy patients, so treatment should be  
30  
31 made to lower homocysteine in HHcy patients in order to reduce arterial stiffness.  
32  
33 And thorough clinical research should be investigated in future.

34  
35  
36 However, there were some limitations in the study: the small sample size, cases,  
37  
38 and controls were not perfectly matched. Also some patients with hypertension and  
39  
40 (or) CAD had oral medication such as amlodipine before coming to the hospital, this  
41  
42 might affect our results to a certain extent. So thorough research should be  
43  
44 investigated in future. However, our study suggested that CAVI was a useful  
45  
46 evaluation index for arterial stiffness, and there was positively correlation between  
47  
48 CAVI and Hcy.  
49  
50  
51  
52  
53  
54  
55  
56  
57  
58  
59  
60

1  
2  
3  
4  
5  
6  
7  
8  
9  
10  
11  
12  
13  
14  
15  
16  
17  
18  
19  
20  
21  
22  
23  
24  
25  
26  
27  
28  
29  
30  
31  
32  
33  
34  
35  
36  
37  
38  
39  
40  
41  
42  
43  
44  
45  
46  
47  
48  
49  
50  
51  
52  
53  
54  
55  
56  
57  
58  
59  
60

In conclusion, our study showed that CAVI and Hcy are closely associated among vascular-related diseases. More studies should be made to investigate the role of Hcy in the development of arterial stiffness.

For peer review only

## Acknowledgments

This work was supported by grants from [The Capital Health Research and Development of Special](#) to HY Wang (No. 2011-4026-02), and the hospital fund of Peking University Shougang Hospital to Hongyu Wang (No. 2010-Y002) and Jinbo Liu (No. 2012Y04).

## Disclosures

No conflicts of interest, financial or otherwise, are declared by the authors.

**Ethics approval:** From the ethics committee of the Health Science Center, Peking University, China.

## References

- [1] Cavalcante JL, Lima JAC, Redheuil A, Al-Mallah MH. Aortic stiffness. *J Am Coll Cardiol* 2011; 57:1511-22.
- [2] Mancia G, De Backer G, Dominiczak A, et al. 2007 guidelines for the management of arterial hypertension: the Task Force for the Management of Arterial Hypertension of the European Society of Hypertension (ESH) and of the European Society of Cardiology (ESC). *J Hypertens* 2007;25:1105– 87.
- [3] Ni Y, Wang H, Hu D, Zhang W. The Relationship between Pulse Wave Velocity and Pulse Pressure in Chinese Patients with Essential Hypertension. *Hypertens Res* 2003;26:871-874.
- [4] Wang H, Zhang W, Gong L, Hu D, et al. Study of Relationship between Large Artery Distensibility and Left Ventricular Hypertrophy in Patients with Essential Hypertension. *Chin J Cardiol*, 2000;28:177-180.
- [5] Shirai K, Utino J, Otsuka K, Takata M. A novel blood pressure-independent arterial wall stiffness parameter: cardio-ankle vascular index (CAVI). *J Atheroscler Thromb* 2006, 13:101-107.
- [6] Kim KJ, Lee BW, Kim HM, Shin JY, Kang ES, Cha BS, et al. Associations between cardio-ankle vascular index and microvascular complications in type 2 diabetes mellitus patients. *J Atheroscler Thromb* 2011;27;18(4):328-36.
- [7] Takaki A, Ogawa H, Wakeyama T, Iwami T, Kimura M, Hadano Y, et al. Cardio-ankle vascular index is a new noninvasive parameter of arterial stiffness. *Circ J* 2007;71(11):1710-4.



- 1  
2  
3  
4 [8] Antoniadou C, Antonopoulos AS, Tousoulis D, Marinou K, Stefanadis C.  
5  
6 Homocysteine and coronary atherosclerosis: from folate fortification to the recent  
7  
8 clinical trials. *European Heart Journal* (2009) 30, 6–15  
9  
10  
11 [9] Topal G, Brunet A, Millanvoye E, Boucher JL, Rendu F, Devynck MA, et al.  
12  
13 Homocysteine induces oxidative stress by uncoupling of NO synthase activity  
14  
15 through reduction of tetrahydrobiopterin. *Free Radic Biol Med*, 2004; 36: 1532-41.  
16  
17  
18 [10] Mezei C, Schumann J, Wagner A, and Gross P. Effects of homocysteine on the  
19  
20 levels of caveolin-1 and eNOS in caveolae of human coronary artery endothelial  
21  
22 cells. *Atherosclerosis*, 2007; 190: 256-63.  
23  
24  
25  
26 [11] He L, Zeng H, Li F, Feng J, Liu S, Liu J, et al. Homocysteine impairs coronary  
27  
28 artery endothelial function by inhibiting tetrahydrobiopterin in patients with  
29  
30 hyperhomocysteinemia. *Am J Physiol Endocrinol Metab* 2010; 299: E1061–E1065.  
31  
32  
33  
34 [12] Kadota K, Takamura N, Aoyagi K, Yamasaki H, Usa T, Nakazato M, et al.  
35  
36 Availability of cardio-ankle vascular index (CAVI) as a screening tool for  
37  
38 atherosclerosis. *Cir J* 2008; 72: 304-308.  
39  
40  
41 [13] Aoun S, Blacher J, Safar ME, Mourad JJ. Diabetes mellitus and renal  
42  
43 failure: effects on large artery stiffness. *Journal of Human Hypertension* 2001;  
44  
45 15:693-700.  
46  
47  
48  
49 [14] Blacher J, Asmar R, Djane S, London GM, Safar ME. Aortic pulse wave velocity  
50  
51 as a marker of cardiovascular risk in hypertensive patients. *Hypertension* 1999; 33:  
52  
53 1111-1117.  
54  
55  
56 [15] Hansen TW, Staessen JA, Torp-Pedersen C, Rasmussen S, Thijs L, Ibsen H, et al.  
57  
58  
59  
60

- 1  
2  
3  
4 Prognostic value of aortic pulse wave velocity as index of arterial stiffness in the  
5  
6 general population. *Circulation*. 2006;113:664-670.  
7  
8  
9 [16] Takaki A, Ogawa H, Wakeyama T, Iwami T, Kimura M, Hadano Y, et al.  
10  
11 Cardio-Ankle Vascular Index is a New Noninvasive Parameter of Arterial  
12  
13 Stiffness. *Circ J* 2007;71:1710–1714.  
14  
15  
16 [17] Liu H, Zhang X, Feng X, Li J, Hu M, Yambe T. Effects of metabolic syndrome  
17  
18 on cardio-ankle vascular index in middle-aged and elderly Chinese. *Metab Syndr*  
19  
20 *Relat Disord* 2011 Apr;9(2):105-10. Epub 2010 Nov 22.  
21  
22  
23 [18] Satoh N, Shimatsu A, Kato Y, Araki R, Koyama K, Okajima T, et al. Evaluation  
24  
25 of the cardio-ankle vascular index, a new indicator of arterial stiffness independent  
26  
27 of blood pressure, in obesity and metabolic syndrome. *Hypertens Res*  
28  
29 2008;31(10):1921-30.  
30  
31  
32 [19] Horinaka S, Yabe A, Yagi H, Ishimura K, Hara H, Iemura T, Matsuoka H.  
33  
34 Comparison of atherosclerotic indicators between cardio ankle vascular index and  
35  
36 brachial ankle pulse wave velocity. *Angiology* 2009 Aug-Sep;60(4):468-76. Epub  
37  
38 2008 Nov 17.  
39  
40  
41 [20] Takaki A, Ogawa H, Wakeyama T, Iwami T, Kimura M, Hasano Y, et al.  
42  
43 Cardio-ankle vascular index is superior to brachial-ankle pulse wave velocity as an  
44  
45 index of arterial stiffness. *Hypertens Res* 2008 Jul;31(7):1347-55.  
46  
47  
48 [21] Horinaka S, Yabe A, Yagi H, Ishimura K, Hara H, Iemura T, et al. Cardio-ankle  
49  
50 vascular index could reflect plaque burden in the coronary artery. *Angiology* 2011  
51  
52 Jul;62(5):401-8. Epub 2011 Mar 18.  
53  
54  
55  
56  
57  
58  
59  
60

1  
2  
3  
4 [22] Ward M, McNulty H, McPartlin J, Strain JJ, Weir DG, Scott JM. Plasma  
5  
6 homocysteine, a risk factor for cardiovascular disease, is lowered by physiological  
7  
8 doses of folic acid. *QJM* 1997;90:519–524.  
9

10  
11 [23] Lange H, Suryapranata H, De Luca G, Borner C, Dille J, Kallmayer K, et al.  
12  
13 Folate therapy and in-stent restenosis after coronary stenting. *N Engl J Med*  
14  
15 2004;350:2673–2681.  
16

17  
18 [24] Shirodaria C, Antoniades C, Lee J, Jackson CE, Robson MD, Francis JM, et al.  
19  
20 Global improvement of vascular function and redox state with low-dose folic acid:  
21  
22 implications for folate therapy in patients with coronary artery disease.  
23  
24 *Circulation*. 2007; May 1:115(17):2262-70.  
25  
26

27  
28 [25] Torrado J, Bia D, Zócalo Y, Farro I, Farro F, Valero M, et al. Carotid-radial pulse  
29  
30 wave velocity as a discriminator of intrinsic wall alterations during evaluation of  
31  
32 endothelial function by flow-mediated dilatation. *Conf Proc IEEE Eng Med Biol*  
33  
34 *Soc*. 2011;2011:6458-61.  
35  
36

37  
38 [26] Lee YS, Kim KS, Nam CW, Han SW, Hur SH, Kim YN, et al. Clinical  
39  
40 implication of carotid-radial pulse wave velocity for patients with coronary artery  
41  
42 disease. *Korean Circulation J* 2006;36:565-572.  
43  
44  
45  
46  
47  
48  
49  
50  
51  
52  
53  
54  
55  
56  
57  
58  
59  
60

**Figure legends**

Figure 1 Relationship between CF-PWV and Hcy (Fig 1A) , CR-PWV and Hcy (Fig 1B) in the entire study group. Hcy: homocysteine. CF-PWV: carotid-femoral pulse wave velocity. CR-PWV: carotid-radial pulse wave velocity.

Figure 2 Relationship between CAVI and Hcy in the entire study group. Hcy: homocysteine. CAVI: cardio-ankle vascular index.

Table 1 Clinical characteristics in different groups according to the numbers of vascular-related diseases.

| Characteristics        | Group 0<br>N=12 | Group 1<br>N=33 | Group 2<br>N=34 | Group 3<br>N=9 | p values |
|------------------------|-----------------|-----------------|-----------------|----------------|----------|
| Age, y                 | 54.4±9.5        | 63.5±13.1       | 73.2±10.0       | 76.1±10.3      | <0.01    |
| Sex(Male/Female)       | 4/8             | 20/13           | 16/18           | 6/3            | 0.283    |
| BMI, kg/m <sup>2</sup> | 22.4±3.3        | 23.9±3.9        | 23.3±4.4        | 25.7±2.6       | 0.32     |
| LDL, mmol/L            | 1.82±0.4        | 1.83±0.6        | 1.71±0.4        | 1.84±0.2       | 0.759    |
| HDL, mmol/L            | 1.90±2.9        | 0.95±0.2        | 1.01±0.3        | 1.00±0.25      | 0.078    |
| Hs-CRP, mg/L           | 4.73±10.8       | 8.14±15.3       | 10.79±15.3      | 17.2±35.8      | 0.496    |
| HbA1c %                | 5.78±0.3        | 5.92±0.5        | 5.86±0.3        | 5.98±1.7       | 0.917    |
| Hcy (umol/L)           | 11.0±2.8        | 19.0±9.1        | 16.7±6.4        | 21.1±8.5       | 0.006    |
| Urinary Microalbumin   | 3.66±4.4        | 16.69±39.0      | 7.50±10.9       | 13.90±22.4     | 0.522    |
| Heart rate             | 75.5±9.6        | 72.4±13.3       | 74.7±13.4       | 69.4±8.5       | 0.621    |
| ABI                    | 1.10±0.13       | 1.10±0.09       | 1.06±0.14       | 1.02±0.21      | 0.284    |
| SBP, mmHg              | 126.0±13.8      | 138.6±19.8      | 145.3±23.1      | 154.3±23.4     | 0.012    |
| DBP, mmHg              | 79.5±7.2        | 81.7±9.5        | 82.7±9.7        | 86.1±9.9       | 0.479    |
| CF-PWV                 | 9.17±2.6        | 12.33±3.0       | 13.03±2.8       | 13.85±1.86     | <0.001   |
| CR-PWV                 | 9.34±0.92       | 10.12±1.98      | 9.8±2.21        | 10.29±2.96     | 0.648    |
| CAVI                   | 7.51±0.9        | 8.23±2.4        | 9.09±2.3        | 9.34±2.0       | 0.08     |

CAD: coronary artery disease. ASO: arteriosclerosis obliterans. Group 0: without diseases of hypertension, CAD, ASO; group 1: with one of diseases of hypertension, CAD, ASO; group 2: with two of diseases of hypertension, CAD, ASO; group 3: with all diseases of hypertension, CAD, ASO; BMI: body mass index. LDL: low-density lipoprotein. HDL: high-density lipoprotein. CRP: C-reactive protein. Hcy: homocysteine. ABI: ankle-brachial index. SBP: systolic blood pressure; DBP: diastolic blood pressure. CF-PWV: carotid-femoral pulse wave velocity. CR-PWV: carotid-radial pulse wave velocity. CAVI: cardio-ankle vascular index. The differences between groups were analyzed by one-way ANOVA. Proportions were analyzed by  $\chi^2$ -test.

Table 2 Clinical characteristics in patients with Hcy&lt;15umol/ and Hcy≥15umol/.

| Characteristics        | Hcy<15umol/L<br>(n=43) | Hcy≥15umol/L<br>(n=45) | p values |
|------------------------|------------------------|------------------------|----------|
| Age, y                 | 61.9±13.0              | 71.9±11.5              | <0.01    |
| Sex(Male/Female)       | 14/29                  | 32/13                  | <0.001   |
| BMI, kg/m <sup>2</sup> | 23.9±4.2               | 23.3±3.8               | 0.48     |
| Hypertension, No(%)    | 26(60.5)               | 31(68.9)               | 0.41     |
| CAD, No(%)             | 18(41.2)               | 25(55.6)               | 0.2      |
| ASO, No(%)             | 8(18.6)                | 17(37.8)               | 0.03     |
| LDL, mmol/L            | 1.72±0.4               | 1.84±0.6               | 0.31     |
| HDL, mmol/L            | 1.19±1.5               | 1.04±0.3               | 0.53     |
| Hs-CRP, mg/L           | 7.70±0.17              | 11.34±19.5             | 0.36     |
| HbA1c %                | 5.80±0.3               | 5.96±0.8               | 0.34     |
| Hcy umol/L             | 11.89±2.0              | 22.19±8.0              | <0.001   |
| Urinary Microalbumin   | 4.35±4.3               | 17.58±35.0             | 0.057    |
| Heartrate              | 72.0±9.7               | 74.9±14.5              | 0.28     |
| ABI                    | 1.09±0.12              | 1.06±0.13              | 0.23     |
| SBP, mmHg              | 134.1±18.2             | 147.0±23.2             | 0.005    |
| DBP, mmHg              | 81.2±8.4               | 83.1±10.0              | 0.36     |
| CF-PWV                 | 10.8±2.5               | 13.7±3.0               | <0.001   |
| CR-PWV                 | 9.2±1.6                | 10.6±2.1               | 0.001    |
| CAVI                   | 7.79±2.1               | 9.30±2.1               | 0.001    |

Results were shown as mean ±SD unless stand otherwise. CAD: coronary artery disease. ASO: arteriosclerosis obliterans. BMI: body mass index. LDL: low-density lipoprotein. HDL: high-density lipoprotein. CRP: C-reactive protein. Hcy: homocysteine. ABI: ankle-brachial index. SBP: systolic blood pressure; DBP: diastolic blood pressure. CF-PWV: carotid-femoral pulse wave velocity. CR-PWV: carotid-radial pulse wave velocity. CAVI: cardio-ankle vascular index. The difference between groups were analyzed by Student' *t*-test. Proportions were analyzed by  $\chi^2$ -test.

1  
2  
3  
4 Descriptive study of possible link between cardio-ankle vascular index  
5  
6 and homocysteine in vascular-related diseases  
7  
8

9 Hongyu Wang<sup>\*,1,#</sup>, Jinbo Liu<sup>\*,1</sup>, Qi Wang<sup>1</sup>, Hongwei Zhao<sup>1</sup>, Hongyan Shi<sup>1</sup>,  
10  
11 Xiaolan Yu<sup>1</sup>, Xiaobao Fu<sup>1</sup>  
12  
13

14  
15 <sup>1</sup> Department of Vascular Medicine; Peking University Shougang Hospital, Beijing  
16  
17 100144, P. R. of China.  
18  
19

20  
21 \* Equal contributors  
22  
23

24  
25 #Corresponding Author: Hongyu Wang, Vascular Medicine; Peking University  
26  
27 Shougang Hospital; Beijing 100144, P. R. of China.  
28  
29

30  
31 Tel (Fax): +8610-57830226; +8610-57830226  
32

33  
34 Email: [hongyuwang@188.com](mailto:hongyuwang@188.com)  
35  
36

37  
38 *Running title:* CAVI and Homocysteine  
39  
40  
41  
42  
43  
44  
45  
46  
47  
48  
49  
50  
51  
52  
53  
54  
55  
56  
57  
58  
59  
60

## Abstract

**Objectives:** Cardio-ankle vascular index (CAVI) is a new index of arterial stiffness independent of immediate blood pressure. Homocysteine (Hcy) is an independent risk factor for vascular diseases. The aim of this study was to investigate the relationship between Hcy and CAVI in vascular-related diseases.

**Design:** Descriptive Research.

**Participants:** 88 patients (M/F 46/42) with or without hypertension, coronary artery disease or arteriosclerosis obliterans were enrolled into our study. They were divided into two groups according to the level of Hcy.

**Methods:** CAVI, carotid-femoral pulse wave velocity (CF-PWV) and carotid-radial pulse wave velocity (CR-PWV) were measured by VS-1000 and Complior apparatus.

**Results:** There was significant correlation between Hcy and CF-PWV, CR-PWV, CAVI in the entire group ( $r=0.33$ ,  $p=0.002$ ;  $r=0.51$ ,  $p<0.001$ ;  $r=0.42$ ,  $p<0.001$ ; respectively). And there was significant correlation between Hcy and CF-PWV, CR-PWV, CAVI in the vascular-related disease group ( $r=0.23$ ,  $p=0.048$ ;  $r=0.51$ ,  $p<0.001$ ;  $r=0.392$ ,  $p=0.001$ ; respectively). The level of Hcy was significantly higher in patients with one or more vascular diseases than in patients without vascular diseases. The levels of CF-PWV, CR-PWV, and CAVI were significantly higher in Hcy  $\geq 15\mu\text{mol/L}$  group than in Hcy  $<15\mu\text{mol/L}$  group ( $13.7\pm 3.0$  vs  $10.8\pm 2.5$ ,  $p<0.001$ ;  $10.6\pm 2.1$  vs  $9.2\pm 1.6$ ,  $p=0.001$ ;  $9.30\pm 2.1$  vs  $7.79\pm 2.1$ ,  $p=0.001$ ; respectively). Multiple linear regression showed that Hcy, body mass index (BMI), and age were independent associating factors of CAVI in the entire study group ( $\beta=0.421$ ,  $p=0.001$ ;



1  
2  
3  
4  $\beta = -0.309, p=0.006; \beta=0.297, p=0.012;$  respectively). And Hcy, BMI, and age were  
5  
6 independent influencing factors of CAVI in vascular-related disease group ( $\beta=0.434,$   
7  
8  $p=0.001; \beta = -0.331, p=0.009; \beta=0.288, p=0.022;$  respectively).

9  
10  
11 **Conclusions:** CAVI was positively correlated with homocysteine in vascular-related  
12  
13 diseases.

14  
15  
16 *Keywords:* Cardio-ankle vascular index; Homocysteine; Vascular-related diseases  
17  
18  
19  
20  
21  
22  
23  
24  
25  
26  
27  
28  
29  
30  
31  
32  
33  
34  
35  
36  
37  
38  
39  
40  
41  
42  
43  
44  
45  
46  
47  
48  
49  
50  
51  
52  
53  
54  
55  
56  
57  
58  
59  
60

1  
2  
3 Article summary  
4

5 1. Article focus  
6

7 To investigate the relationship between homocysteine (Hcy) and Cardio-ankle  
8 vascular index (CAVI) in vascular-related diseases.  
9

10  
11 2. Key messages

12 Homocysteine was positively correlated with CAVI in vascular-related diseases.

13 3. Strengths and limitations of this study

14  
15 Strengths of this study: our present study firstly showed the relationship between  
16 Hcy and CAVI in vascular-related diseases.  
17  
18

19  
20 Limitations of this study: the small sample size, cases, and controls were not  
21 perfectly matched.  
22  
23  
24  
25  
26  
27  
28  
29  
30  
31  
32  
33  
34  
35  
36  
37  
38  
39  
40  
41  
42  
43  
44  
45  
46  
47  
48  
49  
50  
51  
52  
53  
54  
55  
56  
57  
58  
59  
60

## 1. Introduction

Arterial stiffness is a strong predictor of future cardiovascular events and all-cause mortality. And it is one of the earliest detectable manifestations of adverse structural and functional changes within the vessel wall [1]. Arterial stiffness can be measured by pulse wave velocity (PWV), which is considered as the gold standard method suggested by European Society of Hypertension/European Society of Cardiology guidelines [2]. And our previous studies also showed that PWV was positively correlated with pulse pressure and it was increased in hypertension patients with left ventricular hypertrophy [3, 4]. However, PWV itself is essentially dependent on blood pressure especially immediate blood pressure. Cardio-ankle vascular index (CAVI), a new index of arterial stiffness independent of blood pressure, is recently developed by measuring of PWV and blood pressure [5]. Recent studies have showed that CAVI was a reliable index of arterial stiffness in many vascular-related diseases [6,7].

Homocysteine has been considered as an independent risk factor for atherosclerosis [8]. The possible mechanism of this process includes endothelial cell damage, vascular endothelial dysfunction and enhanced oxidative stress. Recent studies showed that homocysteine caused endothelial dysfunction through inhibiting the reactions between endothelial nitric oxide synthase (eNOS) and tetrahydrobiopterin (BH4) [9,10]. Our previous study showed that chronic hyperhomocysteinemia contributed to coronary artery disease by inhibiting dysfunction of the coronary artery endothelium [11]. Increased arterial stiffness

1  
2  
3  
4 resulted from many factors such as endothelial dysfunction, smooth muscle cells  
5  
6 proliferation, thickening of vascular wall. Kadota et al had showed positive  
7  
8 correlation between Hcy and CAVI in general population [12]. However, the  
9  
10 relationship between CAVI and Hcy in vascular-related diseases such as hypertension,  
11  
12 coronary artery disease (CAD), and arteriosclerosis obliterans (ASO) was still  
13  
14 unknown, especially in patients with one more kinds of vascular-related diseases. In  
15  
16 the present study, we investigated the possible link between CAVI and homocysteine  
17  
18 in vascular-related diseases such as hypertension, CAD and ASO.  
19  
20  
21  
22  
23  
24  
25

## 26 **2. Materials and methods**

### 27 *2.1 Subjects*

28  
29  
30  
31 88 patients (M/F: 46/42) with or without hypertension, CAD or ASO from  
32  
33 vascular medicine department of Peking University Shougang Hospital from February  
34  
35 2012 to April 2012 were enrolled into our study. There were 57 patients with  
36  
37 hypertension, 43 with CAD, and 25 patients with ASO in the whole study group. And  
38  
39 there were 12 patients without hypertension, CAD and ASO but suffering one of these  
40  
41 two diseases, acute upper respiratory tract infection or acute gastritis.  
42  
43  
44  
45

46  
47 Hypertension was defined as blood pressure measurement  $\geq 140/90$ mmHg in  
48  
49 three occasions at rest or subjects with known cases of diagnosed hypertension before  
50  
51 and taking antihypertensive drugs at present. CAD or ASO was defined as the  
52  
53 narrowing or blockage of coronary artery or lower extremity artery diagnosed by  
54  
55 angiography. Hyperhomocysteinemia was defined as the level of plasma Hcy  $\geq$   
56  
57  
58  
59  
60

1  
2  
3  
4 15umol/L[11].

5  
6 Enrolled patients were divided into four groups according to numbers of  
7  
8 suffering vascular-related diseases. Also they were divided into two groups according  
9  
10 to level of Hcy (Hcy <15umol/L group, N=43, and Hcy  $\geq$ 15umol/L group, N=45).  
11  
12 All participants gave their written informed consent. This study was approved by the  
13  
14 ethics committee of the Health Science Center, Peking University.  
15  
16  
17  
18  
19

## 20 21 *2.2 Pulse wave velocity measurement*

22  
23 Arterial stiffness was evaluated by measuring automatic PWV using the  
24  
25 Complior apparatus. The basic principle of PWV assessment is that pressure pulse  
26  
27 generated by ventricular ejection is propagated along the arterial system at a speed  
28  
29 determined by elasticity of the arterial wall. Knowing the distance and pulse transit  
30  
31 time, the velocity can be calculated. Patients were placed in recumbent position and,  
32  
33 after a 10-minute rest, underwent PWV measurement and carotid-femoral PWV  
34  
35 (CF-PWV) and carotid-radial PWV (CR-PWV) was obtained automatically. CF-PWV  
36  
37 and CR-PWV are both reliable index for arterial stiffness of vascular diseases  
38  
39 [2,26].And we chose the right PWV for analysis.  
40  
41  
42  
43  
44  
45  
46  
47  
48

## 49 *2.3 The assessment of CAVI*

50  
51 CAVI was recorded using a VaseraVS-1000 vascular screening system (Fukuda  
52  
53 Denshi, Tokyo, Japan) with the participant resting in a supine position. ECG  
54  
55 electrodes were placed on both wrists, a microphone for detecting heart sounds was  
56  
57  
58  
59  
60

1  
2  
3 placed on the sternum, and cuffs were wrapped around both the arms and ankles.  
4  
5  
6 After automatic measurements, obtained data were analyzed by software, and the  
7  
8 value of CAVI was obtained automatically [16]. And we chose the right CAVI for  
9  
10 analysis.  
11  
12

#### 13 14 15 16 *2.4 Laboratory measurements* 17

18  
19 Blood samples were drawn from an antecubital vein in the morning after  
20  
21 overnight fasting and collected into vacuum tubes containing EDTA for the  
22  
23 measurement of plasma lipid and lipoprotein levels. Total cholesterol, high-density  
24  
25 lipoprotein (HDL) cholesterol, and triglyceride levels were analyzed by colorimetric  
26  
27 enzymatic assays with the use of an autoanalyzer (HITACHI-7170, Hitachi, Tokyo,  
28  
29 Japan). Low-density lipoprotein cholesterol (LDL-C) levels were calculated. Fasting  
30  
31 plasma glucose, homocysteine, hs-C reactive protein were also determined by  
32  
33 colorimetric methods of related metabolic products using the same autoanalyzer at the  
34  
35 central chemistry laboratory of the Peking University Shougang Hospital.  
36  
37  
38  
39  
40  
41  
42  
43

#### 44 *2.5 Statistical analysis* 45

46  
47 SPSS 13.0 was used as statistical software in the present study. The differences  
48  
49 between groups were analyzed by Student' *t*-test and one-way ANOVA. Proportions  
50  
51 were analyzed by  $\chi^2$ -test. Correlation coefficient was done to find linear relation  
52  
53 between different variables using Spearman correlation coefficient. Multiple linear  
54  
55 regressions were used to estimate the coefficients of the linear equation, involving  
56  
57  
58  
59  
60

1  
2  
3  
4 independent variables that affected the value of the dependent variables. Values were  
5  
6 shown as mean  $\pm$  SD unless stand otherwise.  $p < 0.05$  (2-tailed) was considered  
7  
8 statistically significant.  
9

### 10 11 12 13 **3. Results**

#### 14 15 16 *3.1 Clinical characteristics of the study participants*

17  
18 The clinical characteristics of study participants are shown in Table 1. Among  
19  
20 these subjects, 33 patients had only one of these three vascular-related diseases, 34  
21  
22 patients had two of these three vascular-related diseases, 9 patients had all of these  
23  
24 three diseases, and 12 subjects with none of vascular-related diseases. Our results  
25  
26 showed that with the increasing numbers of suffered vascular-related diseases, the  
27  
28 level of Hcy was increasing. Similar results were also found in the parameters of  
29  
30 CF-PWV and CAVI. However, we found there was significant difference about age  
31  
32 between these four groups.  
33  
34  
35  
36  
37  
38

39  
40 Next, we divided subjects into two groups according to the level of Hcy. As  
41  
42 shown in Table 2, the level of CAVI was significant higher in patients with  $Hcy \geq$   
43  
44  $15\mu\text{mol/L}$  than in group with  $Hcy < 15\mu\text{mol/L}$ . The similar result was also found in  
45  
46 another evaluation index of arterial stiffness-PWV. However, there was significant  
47  
48 difference about age and sex between these two groups.  
49  
50

#### 51 52 53 *3.2 Pearson correlations between PWV, CAVI and Hcy*

54  
55  
56 PWV is a golden evaluation of arterial stiffness of vascular diseases. There are  
57  
58  
59  
60

1  
2  
3  
4 some kinds of PWV according to different arteries, such as carotid-femoral pulse  
5  
6 wave velocity (CF-PWV), and carotid-radial pulse wave velocity (CR-PWV).  
7  
8 CF-PWV and CR-PWV are both reliable index for arterial stiffness of vascular  
9  
10 diseases [2,26]. In the present study, patients with ASO had bilateral vascular lesions.  
11  
12 And there was no significant difference between right side ankle-brachial index (ABI)  
13  
14 and left side ABI in the entire study group ( $1.08 \pm 0.13$  vs  $1.07 \pm 0.15$ ,  $p=0.612$ ). In  
15  
16 addition, there was no significant difference between right side ABI and left side ABI  
17  
18 in subjects with ASO ( $1.01 \pm 0.18$  vs  $1.05 \pm 0.14$ ,  $p=0.376$ ). And we chose the right  
19  
20 PWV and CAVI for analysis.  
21  
22  
23  
24  
25

26 As shown in Fig 1. CF-PWV was positively correlated with Hcy in entire group  
27  
28 ( $r=0.33$ ,  $p=0.002$ , Fig 1A). There was also significant positive correlation between  
29  
30 CR-PWV and Hcy in all patients ( $r=0.51$ ,  $p<0.001$ , Fig 1B). In addition, our results  
31  
32 showed that there was significant correlation between Hcy and CF-PWV, CR-PWV in  
33  
34 the vascular-related disease group ( $r=0.23$ ,  $p=0.048$ ;  $r=0.51$ ,  $p<0.001$ , respectively).  
35  
36  
37  
38

39 CAVI, a new index of arterial stiffness independent of blood pressure, is recently  
40  
41 developed by measuring of PWV and blood pressure. And CAVI was not affected by  
42  
43 immediate blood pressure. As shown in Fig2, there was significant positive correlation  
44  
45 between CAVI and Hcy in all patients ( $r=0.42$ ,  $p<0.0001$ ). Also we found there was  
46  
47 significant correlation between Hcy and CAVI in the vascular-related disease group  
48  
49 ( $r=0.392$ ,  $p=0.001$ ). However, there was no significant correlation between Hcy and  
50  
51 CF-PWV, CR-PWV, CAVI in patients without vascular-related diseases in the present  
52  
53 study ( $r=0.14$ ,  $p=0.661$ ;  $r=0.152$ ,  $p=0.620$ ;  $r=0.056$ ,  $p=0.855$ ; respectively).  
54  
55  
56  
57  
58  
59  
60



1  
2  
3  
4 As shown in Table 1 and Table 2, there was significant difference about age or  
5  
6 sex between groups. So next, we investigated the possible relationship between CAVI,  
7  
8 PWV and Hcy after adjusting the variable of age or sex. Our results showed that there  
9  
10 was still significant correlation between CAVI and Hcy after adjustment for age in the  
11  
12 entire study group ( $r=0.293$ ,  $p=0.008$ ). Also a positive correlation between PWV and  
13  
14 Hcy was found after age adjusted in the entire study group (CF-PWV vs Hcy,  $r=0.282$ ,  
15  
16  $p=0.010$ ; CR-PWV vs Hcy,  $r=0.462$ ,  $p<0.001$ ; respectively). In addition, there was  
17  
18 significant correlation between Hcy and CF-PWV, CR-PWV, CAVI after age and sex  
19  
20 adjusted in the entire study group ( $r=0.26$ ,  $p=0.022$ ;  $r=0.38$ ,  $p=0.001$ ;  $r=0.27$ ,  $p=0.014$ ;  
21  
22 respectively).

23  
24  
25  
26  
27  
28  
29 There were 12 patients without vascular-related diseases in the entire study group,  
30  
31 so in next step, we analyzed relationship between PWV, CAVI and Hcy in patients  
32  
33 with vascular-related diseases. Our results showed that there was significant  
34  
35 correlation between Hcy and CR-PWV, CAVI after adjustment for age in the  
36  
37 vascular-related disease group ( $r=0.48$ ,  $p<0.001$ ;  $r=0.321$ ,  $p=0.007$ ; respectively),  
38  
39 without significant correlation between Hcy and CF-PWV ( $r=0.21$ ,  $p=0.079$ ). After  
40  
41 adjustment for age and sex, significant correlation between Hcy and CR-PWV, CAVI  
42  
43 was found in the vascular-related disease group ( $r=0.40$ ,  $p=0.001$ ;  $r=0.298$ ,  $p=0.013$ ;  
44  
45 respectively). However, there was no significant correlation between Hcy and  
46  
47 CF-PWV after age and sex adjusted ( $r=0.193$ ,  $p=0.115$ ).

### 56 3.3 Multiple linear regression analysis

57  
58  
59  
60

1  
2  
3  
4 Multiple linear regressions were used to estimate the coefficients of the linear  
5  
6 equation, involving independent variables that affected the value of CAVI. Our results  
7  
8 showed that Hcy, BMI, and age were independent influencing factors of CAVI in the  
9  
10 entire study group ( $\beta=0.421$ ,  $p=0.001$ ;  $\beta= -0.309$ ,  $p=0.006$ ;  $\beta=0.297$ ,  $p=0.012$ ;  
11  
12 respectively). And Hcy, BMI, and age were independent influencing factors of CAVI  
13  
14 in vascular-related disease group ( $\beta=0.434$ ,  $p=0.001$ ;  $\beta= -0.331$ ,  $p=0.009$ ;  $\beta=0.288$ ,  
15  
16  $p=0.022$ ; respectively).  
17  
18  
19  
20  
21  
22  
23  
24  
25  
26  
27  
28  
29  
30  
31  
32  
33  
34  
35  
36  
37  
38  
39  
40  
41  
42  
43  
44  
45  
46  
47  
48  
49  
50  
51  
52  
53  
54  
55  
56  
57  
58  
59  
60

#### 4. Discussion

In the present study, we found that there was positive correlation between Hcy and CAVI in vascular-related diseases. CAVI and PWV were higher in patients with Hcy  $\geq 15\mu\text{mol/L}$ , and Hcy was an independent influencing factor of CAVI in vascular-related diseases.

An increase in arterial stiffness is not only a pathological status of hypertension, diabetes and coronary artery disease but also a strong predictor for the cardiovascular morbidity and mortality caused by these diseases. With the increasing of arterial stiffness, the incidence of hypertension, coronary heart disease increases. And arterial stiffness can be measured by pulse wave velocity (PWV) suggested by European Society of Hypertension/European Society of Cardiology guidelines. A lot of studies have showed the effect of PWV in the evaluation of arterial stiffness of vascular diseases. Aortic PWV was increasing in patients with diabetes mellitus or end-stage renal disease, indicating a higher arterial stiffness compared with health persons [13]. A research of 710 hypertension patients revealed that aortic PWV is a useful marker and predictor of cardiovascular risk in these subjects [14]. Recently, in a prospective study of general Danish population, the investigator found that aortic PWV was a useful predictor for cardiovascular outcomes above and beyond traditional cardiovascular risk factors such as 24-hour mean blood pressure [15]. Recent study showed that CR-PWV was a discriminator of intrinsic wall alterations during evaluation of endothelial function by flow-mediated dilatation and CR-PWV may predict the severity of the CAD [25,26]. Our present study showed that CF-PWV and

1  
2  
3  
4 CR-PWV were higher in patients with vascular-related diseases than in subjects  
5  
6 without vascular-related diseases ( $12.80 \pm 2.9$  vs  $9.17 \pm 2.6$ ,  $p < 0.001$ ;  $10.00 \pm 2.2$  vs  
7  
8  $9.34 \pm 0.92$ ,  $p = 0.08$ , respectively). However, PWV itself is essentially dependent on  
9  
10 blood pressure, especially immediate blood pressure. Cardio-ankle vascular index  
11  
12 (CAVI), a new index of arterial stiffness, is derived from stiffness parameter  $\beta$ , which  
13  
14 is detected by carotid ultrasonic measurement [16].  
15  
16  
17  
18

19 CAVI is a new evaluation index of arterial stiffness independent of immediate  
20  
21 blood pressure. Recent studies have showed the role of CAVI in the prediction of  
22  
23 vascular events in vascular-related diseases such as metabolic syndrome (MS),  
24  
25 diabetes, CAD, and so on. In MS patients, there was significant positive correlation  
26  
27 between CAVI and waist circumference, and CAVI increased significantly with the  
28  
29 number of metabolic syndrome components [17]. In another MS study, they found  
30  
31 that CAVI was significantly decreased after 3-month period weight-reduction therapy  
32  
33 through diet and exercise, so the determination of arterial stiffness by CAVI may be  
34  
35 useful for evaluating and managing the cardiovascular diseases risks of MS patients  
36  
37 [18]. In a comparative study, researchers showed that the diagnostic accuracy of CAD  
38  
39 was significantly higher in the CAVI than in the brachial ankle PWV, which suggested  
40  
41 that CAVI had increased performance over brachial ankle PWV in predicting the  
42  
43 coronary artery disease [16, 17]. Namekata showed that the CAVI method was a  
44  
45 useful tool to screen persons with moderate to advanced levels of arteriosclerosis.  
46  
47 CAD is one of fatal and disabling diseases, some researchers found that CAVI was  
48  
49 significantly correlated with percentage plaque area in coronary arterial disease [21].  
50  
51  
52  
53  
54  
55  
56  
57  
58  
59  
60

1  
2  
3  
4 A lot of studies have showed that CAVI was a reliable evaluation index of  
5  
6 vascular-related diseases. Our present study showed that with the increasing numbers  
7  
8 of vascular-related diseases suffering, the level of CAVI was increasing (Table 1).  
9  
10 CAVI was significantly higher in patients with vascular-related diseases than in  
11  
12 control subjects ( $8.73 \pm 2.3$  vs  $7.51 \pm 0.9$ ,  $p=0.002$ ). And we also found significant  
13  
14 correlation between PWV and CAVI in the entire group (CAVI & CF-PWV:  $r=0.382$ ,  
15  
16  $p<0.001$ ; CAVI & CR-PWV:  $r=0.225$ ,  $p=0.039$ , respectively).  
17  
18  
19  
20

21 Homocysteine (Hcy) is an independent risk factor of cardiovascular diseases.  
22  
23 Hyperhomocysteinemia (HHcy) has been found in more than one half of patients with  
24  
25 hypertension. The possible mechanism of this process includes endothelial cell  
26  
27 damage, vascular endothelial dysfunction and enhanced oxidative stress [9,10]. Our  
28  
29 previous study showed that chronic hyperhomocysteinemia contributed to coronary  
30  
31 artery disease by inhibiting dysfunction of the coronary artery endothelium [11]. So  
32  
33 Hcy might damage the endothelium through complex mechanisms resulting  
34  
35 endothelial dysfunction. Also Hcy could promote the proliferation of smooth muscle  
36  
37 cells through inflammation and so on. Endothelial dysfunction and proliferation of  
38  
39 smooth muscle cells of arterial medium could lead to the increasing of arterial  
40  
41 stiffness. Previous study had showed positive correlation between Hcy and CAVI in  
42  
43 general population [12]. However, there was little research about the relationship  
44  
45 between Hcy and CAVI in patients with one more kinds of vascular-related diseases.  
46  
47 In the present study, we found that CAVI was positively correlated with Hcy even  
48  
49 after adjustment of other parameters, such as age and sex. The similar result was also  
50  
51  
52  
53  
54  
55  
56  
57  
58  
59  
60

1  
2  
3  
4 found between PWV and Hcy. Hcy increases not only in hypertension patients but  
5  
6 also in other vascular diseases. Hcy participates in the pathophysiological process of  
7  
8 these diseases. Hyperhomocysteinemia was defined as the level of Hcy  $\geq 15\mu\text{mol/L}$ .  
9  
10 Next, we compared the arterial stiffness between HHcy group and patients with Hcy  
11  
12  $< 15\mu\text{mol/L}$ . As shown in Table 2, the levels of PWV and CAVI were significantly  
13  
14 higher in group with Hcy  $\geq 15\mu\text{mol/L}$  than in group with Hcy  $< 15\mu\text{mol/L}$ . Finally,  
15  
16 our research showed that Hcy was an independent influencing factor of CAVI in  
17  
18 vascular-related diseases. Folate administration has been consistently shown to reduce  
19  
20 plasma Hcy even in healthy individuals without elevated Hcy levels [22]. Lange et al  
21  
22 found that folic acid treatment could reduce frequency of restenosis after angioplasty  
23  
24 in patients with markedly elevated homocysteine levels [23]. Another study showed  
25  
26 that low-dose folic acid treatment improves vascular function in CAD patients [24].  
27  
28 Our study suggested that CAVI was higher in HHcy patients, so treatment should be  
29  
30 made to lower homocysteine in HHcy patients in order to reduce arterial stiffness.  
31  
32 And thorough clinical research should be investigated in future.  
33  
34  
35  
36  
37  
38  
39  
40

41  
42 However, there were some limitations in the study: the small sample size, cases,  
43  
44 and controls were not perfectly matched. Also some patients with hypertension and  
45  
46 (or) CAD had oral medication such as amlodipine before coming to the hospital, this  
47  
48 might affect our results to a certain extent. So thorough research should be  
49  
50 investigated in future. However, our study suggested that CAVI was a useful  
51  
52 evaluation index for arterial stiffness, and there was positively correlation between  
53  
54 CAVI and Hcy.  
55  
56  
57  
58  
59  
60

1  
2  
3  
4 In conclusion, our study showed that CAVI and Hcy are closely associated  
5  
6 among vascular-related diseases. More studies should be made to investigate the role  
7  
8 of Hcy in the development of arterial stiffness.  
9  
10  
11  
12  
13  
14  
15  
16  
17  
18  
19  
20  
21  
22  
23  
24  
25  
26  
27  
28  
29  
30  
31  
32  
33  
34  
35  
36  
37  
38  
39  
40  
41  
42  
43  
44  
45  
46  
47  
48  
49  
50  
51  
52  
53  
54  
55  
56  
57  
58  
59  
60

For peer review only

### Acknowledgments

This work was supported by grants from The Capital Health Research and Development of Special to HY Wang (No. 2011-4026-02), and the hospital fund of Peking University Shougang Hospital to Hongyu Wang (No. 2010-Y002) and Jinbo Liu (No. 2012Y04).

### Disclosures

No conflicts of interest, financial or otherwise, are declared by the authors.

**Ethics approval:** From the ethics committee of the Health Science Center, Peking University, China.



## References

- [1] Cavalcante JL, Lima JAC, Redheuil A, Al-Mallah MH. Aortic stiffness. *J Am Coll Cardiol* 2011; 57:1511-22.
- [2] Mancia G, De Backer G, Dominiczak A, et al. 2007 guidelines for the management of arterial hypertension: the Task Force for the Management of Arterial Hypertension of the European Society of Hypertension (ESH) and of the European Society of Cardiology (ESC). *J Hypertens* 2007;25:1105– 87.
- [3] Ni Y, Wang H, Hu D, Zhang W. The Relationship between Pulse Wave Velocity and Pulse Pressure in Chinese Patients with Essential Hypertension. *Hypertens Res* 2003;26:871-874.
- [4] Wang H, Zhang W, Gong L, Hu D, et al. Study of Relationship between Large Artery Distensibility and Left Ventricular Hypertrophy in Patients with Essential Hypertension. *Chin J Cardiol*, 2000;28:177-180.
- [5] Shirai K, Utino J, Otsuka K, Takata M. A novel blood pressure-independent arterial wall stiffness parameter: cardio-ankle vascular index (CAVI). *J Atheroscler Thromb* 2006, 13:101-107.
- [6] Kim KJ, Lee BW, Kim HM, Shin JY, Kang ES, Cha BS, et al. Associations between cardio-ankle vascular index and microvascular complications in type 2 diabetes mellitus patients. *J Atheroscler Thromb* 2011;27;18(4):328-36.
- [7] Takaki A, Ogawa H, Wakeyama T, Iwami T, Kimura M, Hadano Y, et al. Cardio-ankle vascular index is a new noninvasive parameter of arterial stiffness. *Circ J* 2007;71(11):1710-4.

- 1  
2  
3  
4 [8] Antoniadou C, Antonopoulos AS, Tousoulis D, Marinou K, Stefanadis C.  
5  
6 Homocysteine and coronary atherosclerosis: from folate fortification to the recent  
7  
8 clinical trials. *European Heart Journal* (2009) 30, 6–15  
9  
10  
11 [9] Topal G, Brunet A, Millanvoye E, Boucher JL, Rendu F, Devynck MA, et al.  
12  
13 Homocysteine induces oxidative stress by uncoupling of NO synthase activity  
14  
15 through reduction of tetrahydrobiopterin. *Free Radic Biol Med*, 2004; 36: 1532-41.  
16  
17  
18 [10] Meze C, Schumann J, Wagner A, and Gross P. Effects of homocysteine on the  
19  
20 levels of caveolin-1 and eNOS in caveolae of human coronary artery endothelial  
21  
22 cells. *Atherosclerosis*, 2007; 190: 256-63.  
23  
24  
25  
26 [11] He L, Zeng H, Li F, Feng J, Liu S, Liu J, et al. Homocysteine impairs coronary  
27  
28 artery endothelial function by inhibiting tetrahydrobiopterin in patients with  
29  
30 hyperhomocysteinemia. *Am J Physiol Endocrinol Metab* 2010; 299: E1061–E1065.  
31  
32  
33  
34 [12] Kadota K, Takamura N, Aoyagi K, Yamasaki H, Usa T, Nakazato M, et al.  
35  
36 Availability of cardio-ankle vascular index (CAVI) as a screening tool for  
37  
38 atherosclerosis. *Cir J* 2008; 72: 304-308.  
39  
40  
41 [13] Aoun S, Blacher J, Safar ME, Mourad JJ. Diabetes mellitus and renal  
42  
43 failure: effects on large artery stiffness. *Journal of Human Hypertension* 2001;  
44  
45 15:693-700.  
46  
47  
48  
49 [14] Blacher J, Asmar R, Djane S, London GM, Safar ME. Aortic pulse wave velocity  
50  
51 as a marker of cardiovascular risk in hypertensive patients. *Hypertension* 1999; 33:  
52  
53 1111-1117.  
54  
55  
56 [15] Hansen TW, Staessen JA, Torp-Pedersen C, Rasmussen S, Thijs L, Ibsen H, et al.  
57  
58  
59  
60

- 1  
2  
3  
4 Prognostic value of aortic pulse wave velocity as index of arterial stiffness in the  
5  
6 general population. *Circulation*. 2006;113:664-670.  
7
- 8  
9 [16] Takaki A, Ogawa H, Wakeyama T, Iwami T, Kimura M, Hadano Y, et al.  
10  
11 Cardio-Ankle Vascular Index is a New Noninvasive Parameter of Arterial  
12  
13 Stiffness. *Circ J* 2007;71:1710–1714.  
14
- 15  
16 [17]Liu H, Zhang X, Feng X, Li J, Hu M, Yambe T. Effects of metabolic syndrome  
17  
18 on cardio-ankle vascular index in middle-aged and elderly Chinese. *Metab Syndr*  
19  
20 *Relat Disord* 2011 Apr;9(2):105-10. Epub 2010 Nov 22.  
21  
22
- 23  
24 [18] Satoh N, Shimatsu A, Kato Y, Araki R, Koyama K, Okajima T, et al. Evaluation  
25  
26 of the cardio-ankle vascular index, a new indicator of arterial stiffness independent  
27  
28 of blood pressure, in obesity and metabolic syndrome. *Hypertens Res*  
29  
30 2008;31(10):1921-30.  
31  
32
- 33  
34 [19]Horinaka S, Yabe A, Yagi H, Ishimura K, Hara H, Iemua T, Matsuoka H.  
35  
36 Comparison of atherosclerotic indicators between cardio ankle vascular index and  
37  
38 brachial ankle pulse wave velocity. *Angiology* 2009 Aug-Sep;60(4):468-76. Epub  
39  
40 2008 Nov 17.  
41  
42
- 43  
44 [20]Takaki A, Ogawa H, Wakeyama T, Iwami T, Kimura M, Hasano Y, et al.  
45  
46 Cardio-ankle vascular index is superior to brachial-ankle pulse wave velocity as an  
47  
48 index of arterial stiffness. *Hypertens Res* 2008 Jul;31(7):1347-55.  
49  
50
- 51  
52 [21]Horinaka S, Yabe A, Yagi H, Ishimura K, Hara H, Iemura T, et al. Cardio-ankle  
53  
54 vascular index could reflect plaque burden in the coronary artery. *Angiology* 2011  
55  
56 Jul;62(5):401-8. Epub 2011 Mar 18.  
57  
58  
59  
60

- 1  
2  
3  
4 [22] Ward M, McNulty H, McPartlin J, Strain JJ, Weir DG, Scott JM. Plasma  
5  
6 homocysteine, a risk factor for cardiovascular disease, is lowered by physiological  
7  
8 doses of folic acid. *QJM* 1997;90:519–524.  
9  
10  
11 [23] Lange H, Suryapranata H, De Luca G, Borner C, Dille J, Kallmayer K, et al.  
12  
13 Folate therapy and in-stent restenosis after coronary stenting. *N Engl J Med*  
14  
15 2004;350:2673–2681.  
16  
17  
18 [24] Shirodaria C, Antoniadou C, Lee J, Jackson CE, Robson MD, Francis JM, et al.  
19  
20 Global improvement of vascular function and redox state with low-dose folic acid:  
21  
22 implications for folate therapy in patients with coronary artery disease.  
23  
24 *Circulation*. 2007; May 1;115(17):2262-70.  
25  
26  
27  
28 [25] Torrado J, Bia D, Zócalo Y, Farro I, Farro F, Valero M, et al. Carotid-radial pulse  
29  
30 wave velocity as a discriminator of intrinsic wall alterations during evaluation of  
31  
32 endothelial function by flow-mediated dilatation. *Conf Proc IEEE Eng Med Biol*  
33  
34 *Soc*. 2011;2011:6458-61.  
35  
36  
37  
38 [26] Lee YS, Kim KS, Nam CW, Han SW, Hur SH, Kim YN, et al. Clinical  
39  
40 implication of carotid-radial pulse wave velocity for patients with coronary artery  
41  
42 disease. *Korean Circulation J* 2006;36:565-572.  
43  
44  
45  
46  
47  
48  
49  
50  
51  
52  
53  
54  
55  
56  
57  
58  
59  
60

**Figure legends**

Figure 1 Relationship between CF-PWV and Hcy (Fig 1A) , CR-PWV and Hcy (Fig 1B) in the entire study group. Hcy: homocysteine. CF-PWV: carotid-femoral pulse wave velocity. CR-PWV: carotid-radial pulse wave velocity.

Figure 2 Relationship between CAVI and Hcy in the entire study group. Hcy: homocysteine. CAVI: cardio-ankle vascular index.

Table 1 Clinical characteristics in different groups according to the numbers of vascular-related diseases.

| Characteristics        | Group 0<br>N=12 | Group 1<br>N=33 | Group 2<br>N=34 | Group 3<br>N=9 | p values |
|------------------------|-----------------|-----------------|-----------------|----------------|----------|
| Age, y                 | 54.4±9.5        | 63.5±13.1       | 73.2±10.0       | 76.1±10.3      | <0.01    |
| Sex(Male/Female)       | 4/8             | 20/13           | 16/18           | 6/3            | 0.283    |
| BMI, kg/m <sup>2</sup> | 22.4±3.3        | 23.9±3.9        | 23.3±4.4        | 25.7±2.6       | 0.32     |
| LDL, mmol/L            | 1.82±0.4        | 1.83±0.6        | 1.71±0.4        | 1.84±0.2       | 0.759    |
| HDL, mmol/L            | 1.90±2.9        | 0.95±0.2        | 1.01±0.3        | 1.00±0.25      | 0.078    |
| Hs-CRP, mg/L           | 4.73±10.8       | 8.14±15.3       | 10.79±15.3      | 17.2±35.8      | 0.496    |
| HbA1c %                | 5.78±0.3        | 5.92±0.5        | 5.86±0.3        | 5.98±1.7       | 0.917    |
| Hcy (umol/L)           | 11.0±2.8        | 19.0±9.1        | 16.7±6.4        | 21.1±8.5       | 0.006    |
| Urinary Microalbumin   | 3.66±4.4        | 16.69±39.0      | 7.50±10.9       | 13.90±22.4     | 0.522    |
| Heart rate             | 75.5±9.6        | 72.4±13.3       | 74.7±13.4       | 69.4±8.5       | 0.621    |
| ABI                    | 1.10±0.13       | 1.10±0.09       | 1.06±0.14       | 1.02±0.21      | 0.284    |
| SBP, mmHg              | 126.0±13.8      | 138.6±19.8      | 145.3±23.1      | 154.3±23.4     | 0.012    |
| DBP, mmHg              | 79.5±7.2        | 81.7±9.5        | 82.7±9.7        | 86.1±9.9       | 0.479    |
| CF-PWV                 | 9.17±2.6        | 12.33±3.0       | 13.03±2.8       | 13.85±1.86     | <0.001   |
| CR-PWV                 | 9.34±0.92       | 10.12±1.98      | 9.8±2.21        | 10.29±2.96     | 0.648    |
| CAVI                   | 7.51±0.9        | 8.23±2.4        | 9.09±2.3        | 9.34±2.0       | 0.08     |

CAD: coronary artery disease. ASO: arteriosclerosis obliterans. Group 0: without diseases of hypertension, CAD, ASO; group 1: with one of diseases of hypertension, CAD, ASO; group 2: with two of diseases of hypertension, CAD, ASO; group 3: with all diseases of hypertension, CAD, ASO; BMI: body mass index. LDL: low-density lipoprotein. HDL: high-density lipoprotein. CRP: C-reactive protein. Hcy: homocysteine. ABI: ankle-brachial index. SBP: systolic blood pressure; DBP: diastolic blood pressure. CF-PWV: carotid-femoral pulse wave velocity. CR-PWV: carotid-radial pulse wave velocity. CAVI: cardio-ankle vascular index. The differences between groups were analyzed by one-way ANOVA. Proportions were analyzed by  $\chi^2$ -test.

Table 2 Clinical characteristics in patients with Hcy&lt;15umol/ and Hcy≥15umol/.

| Characteristics        | Hcy<15umol/L<br>(n=43) | Hcy≥15umol/L<br>(n=45) | <i>p</i> values |
|------------------------|------------------------|------------------------|-----------------|
| Age, y                 | 61.9±13.0              | 71.9±11.5              | <0.01           |
| Sex(Male/Female)       | 14/29                  | 32/13                  | <0.001          |
| BMI, kg/m <sup>2</sup> | 23.9±4.2               | 23.3±3.8               | 0.48            |
| Hypertension, No(%)    | 26(60.5)               | 31(68.9)               | 0.41            |
| CAD, No(%)             | 18(41.2)               | 25(55.6)               | 0.2             |
| ASO, No(%)             | 8(18.6)                | 17(37.8)               | 0.03            |
| LDL, mmol/L            | 1.72±0.4               | 1.84±0.6               | 0.31            |
| HDL, mmol/L            | 1.19±1.5               | 1.04±0.3               | 0.53            |
| Hs-CRP, mg/L           | 7.70±0.17              | 11.34±19.5             | 0.36            |
| HbA1c %                | 5.80±0.3               | 5.96±0.8               | 0.34            |
| Hcy umol/L             | 11.89±2.0              | 22.19±8.0              | <0.001          |
| Urinary Microalbumin   | 4.35±4.3               | 17.58±35.0             | 0.057           |
| Heartrate              | 72.0±9.7               | 74.9±14.5              | 0.28            |
| ABI                    | 1.09±0.12              | 1.06±0.13              | 0.23            |
| SBP, mmHg              | 134.1±18.2             | 147.0±23.2             | 0.005           |
| DBP, mmHg              | 81.2±8.4               | 83.1±10.0              | 0.36            |
| CF-PWV                 | 10.8±2.5               | 13.7±3.0               | <0.001          |
| CR-PWV                 | 9.2±1.6                | 10.6±2.1               | 0.001           |
| CAVI                   | 7.79±2.1               | 9.30±2.1               | 0.001           |

Results were shown as mean ±SD unless stand otherwise. CAD: coronary artery disease. ASO: arteriosclerosis obliterans. BMI: body mass index. LDL: low-density lipoprotein. HDL: high-density lipoprotein. CRP: C-reactive protein. Hcy: homocysteine. ABI: ankle-brachial index. SBP: systolic blood pressure; DBP: diastolic blood pressure. CF-PWV: carotid-femoral pulse wave velocity. CR-PWV: carotid-radial pulse wave velocity. CAVI: cardio-ankle vascular index. The difference between groups were analyzed by Student' *t*-test. Proportions were analyzed by  $\chi^2$ -test.

Fig 1

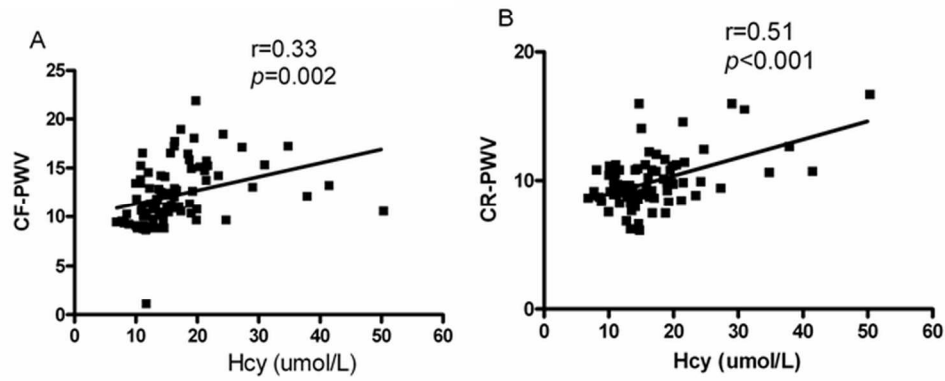

Figure 1 Relationship between CF-PWV and Hcy (Fig 1A) , CR-PWV and Hcy (Fig 1B) in the entire study group. Hcy: homocysteine. CF-PWV: carotid-femoral pulse wave velocity. CR-PWV: carotid-radial pulse wave velocity.

189x90mm (300 x 300 DPI)



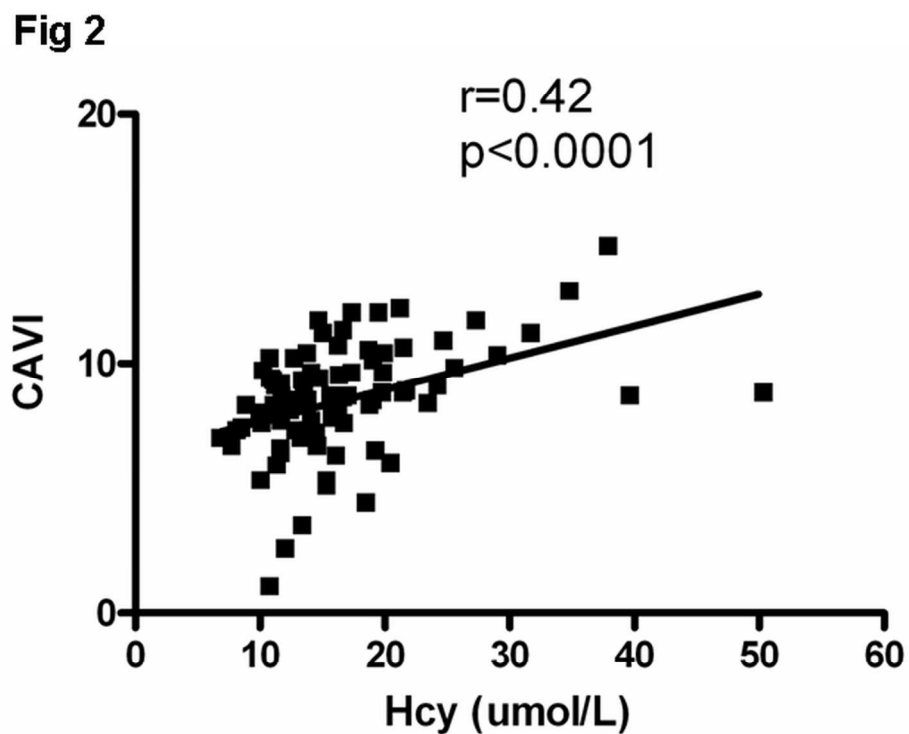

Figure 2 Relationship between CAVI and Hcy in the entire study group. Hcy: homocysteine. CAVI: cardio-ankle vascular index.  
118x90mm (300 x 300 DPI)
